# Supplementary material for: Combination of several predictors for forensic age estimation
Source: Springer Nature journal article supplement (doi:10.1007/s00194-023-00672-7), 2024-01-03

```
with(Statistics) :
with(plots) :
with(LinearAlgebra) :
with(SignalProcessing) :
```

```
printlevel := 4 :
```

```
ZPi := 3.1415926535897932384626433832795
```

```
ZPi := 3.1415926535897932384626433832795
```

(1)

```
# INPUT Data P(A | M)
```

```
#
```

```
#####
#####
```

```
# #####
```

```
#####
```

```
# Berechnung P(M|A) aus Table 4 für P(A|M) in OLZE 2012 Third molars
```

```
# #####
```

```
#####
```

```
# #####
```

```
#####
```

```
# #####
```

```
#Bestückung der Matrix X #####
```

```
# ##### Also: N =279 - 12 = Tab 4:p872: Non impacted 3-rd molars #####
```

```
#
```

```
#####
#####
```

```
# #####Spalte 1: Tooth; 2: Stage; 3: N; 4: Min; 5: Max; 6: Mean; 7: SD; 8:LQ; 9:Median; 10: UQ #####
```

```
#
```

```
#####
#####
```

```
# M = ml
```

```
X := Matrix([ [18, 1, 11, 10.29, 15.72, 13.21, 1.49, 12.14, 13.05, 14.13 ],
[18, 2, 14, 13.07, 19.73, 15.57, 2.04, 13.67, 15.09, 17.03 ],
[18, 3, 22, 12.83, 23.09, 17.86, 2.34, 16.46, 17.37, 19.35 ],
[18, 4, 45, 15.57, 26.73, 20.95, 2.62, 18.82, 21.00, 22.94 ],
[18, 5, 282, 17.06, 26.95, 22.68, 2.15, 21.27, 22.78, 24.31 ],
[28, 1, 13, 10.29, 15.20, 13.39, 1.47, 12.42, 13.34, 14.80 ],
```

```
[28, 2, 11, 12.14, 18.46, 14.94, 2.06, 13.52, 14.17, 16.80 ],
[28, 3, 26, 12.83, 23.09, 17.92, 2.43, 16.36, 17.66, 19.57 ],
[28, 4, 42, 15.57, 26.73, 20.49, 2.59, 18.52, 20.44, 22.54 ],
[28, 5, 288, 17.38, 26.95, 22.76, 2.12, 21.27, 22.87, 24.36 ],
[38, 3, 20, 12.83, 21.86, 18.43, 2.35, 16.63, 18.21, 20.54 ],
[38, 4, 23, 17.61, 25.17, 20.73, 2.10, 19.14, 20.10, 22.49 ],
[38, 5, 217, 17.38, 26.95, 22.80, 2.02, 21.32, 22.88, 24.32 ],
[48, 3, 19, 12.83, 23.43, 18.48, 2.54, 16.74, 18.39, 20.37 ],
[48, 4, 30, 15.77, 24.88, 20.25, 2.17, 18.53, 20.00, 21.74 ],
[48, 5, 225, 17.38, 26.91, 22.91, 1.96, 21.39, 23.12, 24.41 ]]) :
```

```
#
#####
#####
# #####
#####
# Berechnung P(M|A) aus OLZE 2008 Studies wisdom tooth eruption German pp.426-429
# #####
#####
# #####
#####
```

```
interface(rtablessize = 100)
100 (2)
```

```
NMI = 4;
NMI = 4 (3)
```

```
# #####
#Bestückung der Matrix X #####
# ##### Also: N =144 Tab 2:p427: Non impacted 3-rd molars
# #####
#
#####
#####
# #####Spalte 1: Tooth; 2: Stage; 3: N; 4: Min; 5: Max; 6: Mean; 7: SD; 8:LQ;
# 9:Median; 10: UQ #####
#
#####
#####
```

```
X := Matrix([[18, 1, 14, 14.7, 24.9, 18.9, 3.4, 15.5, 18.3, 21.9],
[18, 2, 32, 14.9, 25.7, 20.8, 2.7, 19.7, 21.2, 22.9],
[18, 3, 15, 18.7, 25.8, 22.1, 2.3, 20.1, 21.3, 24.2],
[18, 4, 31, 19.0, 26.9, 23.4, 2.3, 21.9, 24.0, 25.2],
[28, 1, 13, 15.0, 26.1, 18.8, 3.3, 15.5, 18.5, 21.0],
[28, 2, 34, 14.7, 25.7, 21.2, 3.0, 19.5, 21.7, 23.3],
[28, 3, 14, 20.0, 5.2, 21.4, 1.5, 20.4, 20.9, 22.4],
```

[28, 4, 33, 19.2, 26.9, 23.7, 2.2, 22.4, 24.5, 25.4],  
 [38, 1, 6, 14.7, 22.9, 18.6, 3.5, 15.1, 18.3, 22.2],  
 [38, 2, 17, 19.0, 26.1, 22.4, 2.0, 20.8, 22.5, 24.0],  
 [38, 3, 30, 20.0, 26.6, 22.8, 2.1, 21.2, 22.3, 24.7],  
 [38, 4, 27, 19.5, 26.9, 23.6, 2.1, 22.6, 24.0, 25.0],  
 [48, 1, 8, 14.7, 25.2, 19.9, 4.0, 15.7, 20.0, 23.9],  
 [48, 2, 27, 14.9, 26.6, 21.3, 2.9, 19.9, 21.9, 22.9],  
 [48, 3, 33, 18.7, 25.8, 22.7, 1.9, 21.4, 22.7, 24.2],  
 [48, 4, 25, 19.5, 26.9, 23.7, 2.2, 22.1, 24.2, 25.5]]) :

$X$

|    |   |    |      |      |      |     |      |      |      |
|----|---|----|------|------|------|-----|------|------|------|
| 18 | 1 | 14 | 14.7 | 24.9 | 18.9 | 3.4 | 15.5 | 18.3 | 21.9 |
| 18 | 2 | 32 | 14.9 | 25.7 | 20.8 | 2.7 | 19.7 | 21.2 | 22.9 |
| 18 | 3 | 15 | 18.7 | 25.8 | 22.1 | 2.3 | 20.1 | 21.3 | 24.2 |
| 18 | 4 | 31 | 19.0 | 26.9 | 23.4 | 2.3 | 21.9 | 24.0 | 25.2 |
| 28 | 1 | 13 | 15.0 | 26.1 | 18.8 | 3.3 | 15.5 | 18.5 | 21.0 |
| 28 | 2 | 34 | 14.7 | 25.7 | 21.2 | 3.0 | 19.5 | 21.7 | 23.3 |
| 28 | 3 | 14 | 20.0 | 5.2  | 21.4 | 1.5 | 20.4 | 20.9 | 22.4 |
| 28 | 4 | 33 | 19.2 | 26.9 | 23.7 | 2.2 | 22.4 | 24.5 | 25.4 |
| 38 | 1 | 6  | 14.7 | 22.9 | 18.6 | 3.5 | 15.1 | 18.3 | 22.2 |
| 38 | 2 | 17 | 19.0 | 26.1 | 22.4 | 2.0 | 20.8 | 22.5 | 24.0 |
| 38 | 3 | 30 | 20.0 | 26.6 | 22.8 | 2.1 | 21.2 | 22.3 | 24.7 |
| 38 | 4 | 27 | 19.5 | 26.9 | 23.6 | 2.1 | 22.6 | 24.0 | 25.0 |
| 48 | 1 | 8  | 14.7 | 25.2 | 19.9 | 4.0 | 15.7 | 20.0 | 23.9 |
| 48 | 2 | 27 | 14.9 | 26.6 | 21.3 | 2.9 | 19.9 | 21.9 | 22.9 |
| 48 | 3 | 33 | 18.7 | 25.8 | 22.7 | 1.9 | 21.4 | 22.7 | 24.2 |
| 48 | 4 | 25 | 19.5 | 26.9 | 23.7 | 2.2 | 22.1 | 24.2 | 25.5 |

(4)

$NM18 := 4;$   
 $NM28 := 4;$   
 $NM38 := 4;$   
 $NM48 := 4;$

```

NM18 := 4
NM28 := 4
NM38 := 4
NM48 := 4

```

(5)

```

#####
# Berechnung von P(A | M=m) für alle m
# Normalannahme ==> E,S
#####

```

```

# Matrix für Gleichungssystem

```

```

G := Matrix(7, 2, 0.) :

```

```

# Ergebnisvektor E

```

```

E18 := Vector[column](NM18) :

```

```

S18 := Vector[column](NM18) :

```

```

E28 := Vector[column](NM28) :

```

```

S28 := Vector[column](NM28) :

```

```

E38 := Vector[column](NM38) :

```

```

S38 := Vector[column](NM38) :

```

```

E48 := Vector[column](NM48) :

```

```

S48 := Vector[column](NM48) :

```

```

for j from 1 to NM18 do

```

```

    S18(j) := X[j, 7] : E18(j) := X[j, 6] :

```

```

od:

```

```

E18; S18;

```

$$\begin{bmatrix} 18.9 \\ 20.8 \\ 22.1 \\ 23.4 \end{bmatrix}$$

$$\begin{bmatrix} 3.4 \\ 2.7 \\ 2.3 \\ 2.3 \end{bmatrix}$$

(6)

```

for j from NM18 + 1 to NM18 + NM28 do

```

```

    S28(j - NM18) := X[j, 7] : E28(j - NM18) := X[j, 6] :

```

```

od:

```

```

# G; S28;

```

**for**  $j$  **from**  $NM18 + NM28 + 1$  **to**  $NM18 + NM28 + NM38$  **do**  
     $S38(j - NM18 - NM28) := X[j, 7]; E38(j - NM18 - NM28) := X[j, 6];$

**od:**

**for**  $j$  **from**  $NM18 + NM28 + NM38 + 1$  **to**  $NM18 + NM28 + NM38 + NM48$  **do**  
     $S48(j - NM18 - NM28 - NM38) := X[j, 7]; E348(j - NM18 - NM28 - NM38) := X[j, 6];$

**od:**

$E18; S18;$

$$\begin{bmatrix} 18.9 \\ 20.8 \\ 22.1 \\ 23.4 \end{bmatrix}$$
$$\begin{bmatrix} 3.4 \\ 2.7 \\ 2.3 \\ 2.3 \end{bmatrix}$$

**(7)**

$E28; S28;$

$$\begin{bmatrix} 18.8 \\ 21.2 \\ 21.4 \\ 23.7 \end{bmatrix}$$
$$\begin{bmatrix} 3.3 \\ 3.0 \\ 1.5 \\ 2.2 \end{bmatrix}$$

**(8)**

$E38; S38;$

$$\begin{bmatrix} 18.6 \\ 22.4 \\ 22.8 \\ 23.6 \end{bmatrix}$$

$$\begin{bmatrix} 3.5 \\ 2.0 \\ 2.1 \\ 2.1 \end{bmatrix}$$

(9)

E48; S48;

$$\begin{bmatrix} 0 \\ 0 \\ 0 \\ 0 \end{bmatrix}$$
$$\begin{bmatrix} 4.0 \\ 2.9 \\ 1.9 \\ 2.2 \end{bmatrix}$$

(10)

```
# Datenmatrix Alter OLZE 2008: Tab. 1 #####  
#### Spalte: 1: Alter, 2: Anz. Männer, 3: Anz. Frauen #####  
interface(rtablesize = 100)
```

100

(11)

```
Y := Matrix([[12, 0, 13],  
[13, 0, 28],  
[14, 2, 33],  
[15, 5, 48],  
[16, 5, 45],  
[17, 1, 49],  
[18, 5, 41],  
[19, 11, 51],  
[20, 19, 39],  
[21, 22, 60],  
[22, 18, 31],  
[23, 18, 42],  
[24, 19, 33],  
[25, 14, 9],  
[26, 5, 0]]) :
```

```
# Anzahl Alterseinträge  
NA := 14;
```

$$NA := 14 \quad (12)$$

# Gesamtzahl Männer  $\leq P(A)$   
 $NMenA := add(Y[i, 2], i = 1 .. NA + 1);$

$$NMenA := 144 \quad (13)$$

# Gesamtzahl Männer  $\leq P(M)$   
 $NMenM18 := add(X[j, 3], j = 1 .. NM18);$

$$NMenM18 := 92 \quad (14)$$

$NMenM28 := add(X[j, 3], j = NM18 + 1 .. NM18 + NM28);$

$$NMenM28 := 94 \quad (15)$$

$NMenM38 := add(X[j, 3], j = NM18 + NM28 + 1 .. NM18 + NM28 + NM38);$

$$NMenM38 := 80 \quad (16)$$

$NMenM48 := add(X[j, 3], j = NM18 + NM28 + NM38 + 1 .. NM18 + NM28 + NM38 + NM48);$

$$NMenM48 := 93 \quad (17)$$

#####  
 #####  
 #!!!!!!!!!!!!!!!!!!!! ACHTUNG: AB HIER NA=21 UND AMin=9 WEGEN KOMPATIBILITÄT MIT  
 CLAVICULA-STUDIE !!!!!!!!!!!!!!!!!!!!!!!!!!!!!!!!!!!!!  
 #####  
 #####

$NAAlt := 14$

$$NAAlt := 14 \quad (18)$$

$AMinAlt := 12;$

$$AMinAlt := 12 \quad (19)$$

$NA := 21$

$$NA := 21 \quad (20)$$

$AMin := 9;$

$$AMin := 9 \quad (21)$$

#####  
 # Berechnung  $P(M | A)$  mit:

$$\# P(M=m | A=a) = P(A=a | M=m) \cdot \frac{P(M=m)}{P(A=a)} = P(A=a | M=m) \cdot \frac{\frac{N(M=m)}{NM}}{\frac{N(A=a)}{NA}}$$

#####

$PM18A := Matrix(NA, NM18, 0.) :$   
 $PAM18 := Matrix(NM18, NA, 0.) :$   
 $PM28A := Matrix(NA, NM28, 0.) :$

$PAM28 := Matrix(NM28, NA, 0.) :$   
 $PM38A := Matrix(NA, NM38, 0.) :$   
 $PAM38 := Matrix(NM38, NA, 0.) :$   
 $PM48A := Matrix(NA, NM48, 0.) :$   
 $PAM48 := Matrix(NM48, NA, 0.) :$

$SPAM18 := Vector(NM18, 0.) :$   
 $SPAM28 := Vector(NM28, 0.) :$   
 $SPAM38 := Vector(NM38, 0.) :$   
 $SPAM48 := Vector(NM48, 0.) :$   
 $SPMA18 := Vector(NA, 0.) :$   
 $SPMA28 := Vector(NA, 0.) :$   
 $SPMA38 := Vector(NA, 0.) :$   
 $SPMA48 := Vector(NA, 0.) :$

$PM18 := Vector(NM18, 0.)$

$$PM18 := \begin{bmatrix} 0. \\ 0. \\ 0. \\ 0. \end{bmatrix} \quad (22)$$

$PM28 := Vector(NM28, 0.)$

$$PM28 := \begin{bmatrix} 0. \\ 0. \\ 0. \\ 0. \end{bmatrix} \quad (23)$$

$PM38 := Vector(NM38, 0.)$

$$PM38 := \begin{bmatrix} 0. \\ 0. \\ 0. \\ 0. \end{bmatrix} \quad (24)$$

$PM48 := Vector(NM48, 0.)$

$$PM48 := \begin{bmatrix} 0. \\ 0. \\ 0. \\ 0. \end{bmatrix} \quad (25)$$



$PA18 := \text{Vector}(NA, 0.) :$   
 $PA28 := \text{Vector}(NA, 0.) :$   
 $PA38 := \text{Vector}(NA, 0.) :$   
 $PA48 := \text{Vector}(NA, 0.) :$

**for**  $i$  **from** 1 **to**  $NA$  **do** #Alter  $A$

**for**  $j$  **from** 1 **to**  $NM18$  **do** #Merkmal  $M$

$PAM18[j, i] := \text{CDF}(\text{Normal}(E18(j), S18(j)), \text{convert}(i + AMin + 1, \text{float}))$   
 $- \text{CDF}(\text{Normal}(E18(j), S18(j)), \text{convert}(i + AMin, \text{float})) :$

$PM18[j] := \frac{\text{convert}(X[j, 3], \text{float})}{\text{convert}(NMenM18, \text{float})} :$

$PA18[i] := PA18[i] + PAM18[j, i] \cdot PM18[j] :$

**od:**

**for**  $j$  **from** 1 **to**  $NM28$  **do** #Merkmal  $M$

$PAM28[j, i] := \text{CDF}(\text{Normal}(E28(j), S28(j)), \text{convert}(i + AMin + 1, \text{float}))$   
 $- \text{CDF}(\text{Normal}(E28(j), S28(j)), \text{convert}(i + AMin, \text{float})) :$

$PM28[j] := \frac{\text{convert}(X[j + NM18, 3], \text{float})}{\text{convert}(NMenM28, \text{float})} :$

$PA28[i] := PA28[i] + PAM28[j, i] \cdot PM28[j] :$

**od:**

**for**  $j$  **from** 1 **to**  $NM38$  **do** #Merkmal  $M$

$PAM38[j, i] := \text{CDF}(\text{Normal}(E38(j), S38(j)), \text{convert}(i + AMin + 1, \text{float}))$   
 $- \text{CDF}(\text{Normal}(E38(j), S38(j)), \text{convert}(i + AMin, \text{float})) :$

$PM38[j] := \frac{\text{convert}(X[j + NM18 + NM28, 3], \text{float})}{\text{convert}(NMenM38, \text{float})} :$

$PA38[i] := PA38[i] + PAM38[j, i] \cdot PM38[j] :$

**od:**

**for**  $j$  **from** 1 **to**  $NM48$  **do** #Merkmal  $M$

$PAM48[j, i] := \text{CDF}(\text{Normal}(E48(j), S48(j)), \text{convert}(i + AMin + 1, \text{float}))$   
 $- \text{CDF}(\text{Normal}(E48(j), S48(j)), \text{convert}(i + AMin, \text{float})) :$

$PM48[j] := \frac{\text{convert}(X[j + NM18 + NM28 + NM38, 3], \text{float})}{\text{convert}(NMenM48, \text{float})} :$

$PA48[i] := PA48[i] + PAM48[j, i] \cdot PM48[j] :$

**od:**

**od:**

$PAM18; PA18;$

$[ [ 0.00564844833254520, 0.0111328191498919, 0.0201361776569166, 0.0334230554075498,$   
 $0.0509112381874338, 0.0711673076826027, 0.0912951184498982, 0.107476941523388,$

0.116113882188486, 0.115120926585945, 0.104743159916656, 0.0874577117623363,  
0.0670148687903280, 0.0471242266689881, 0.0304100048035884, 0.0180088889447834,  
0.00978710687525741, 0.00488109585823993, 0.00223395474826060,  
0.000938261063375356, 0.000361629118087348 ],  
[ 0.000110242842916382, 0.000416603605773819, 0.00137451057945856,  
0.00395945603943091, 0.00995850985462634, 0.0218691856493611,  
0.0419331281673903, 0.0702059903248139, 0.102633239241318, 0.131009369536009,  
0.146022370684465, 0.142115078950718, 0.120771483531935, 0.0896170416887110,  
0.0580652109584672, 0.0328500952540569, 0.0162273389822779, 0.00699909229884732,  
0.00263580007749242, 0.000866664711275611, 0.000248798792775617 ],  
[  $6.24520799352849 \times 10^{-7}$ ,  $4.93742613854645 \times 10^{-6}$ , 0.0000323908504886411,  
0.000176338416941091, 0.000796722955280451, 0.00298768097303431,  
0.00929941487713924, 0.0240268299595985, 0.0515321510228085, 0.0917526749169538,  
0.135622434190326, 0.166427874927243, 0.169553710536360, 0.143408759629362,  
0.100699460566248, 0.0587020371326155, 0.0284080180405931, 0.0114123083696718,  
0.00380566096890822, 0.00105338335374927, 0.000241999870858156 ],  
[  $3.21369419584182 \times 10^{-8}$ ,  $3.23857659622509 \times 10^{-7}$ ,  $2.70784924448310 \times 10^{-6}$ ,  
0.0000187867684436322, 0.000108161390448948, 0.000516795327545868,  
0.00204937978907322, 0.00674547802602003, 0.0184295753353912,  
0.0417977402057587, 0.0786944384971100, 0.122999672701846, 0.159603806092293,  
0.171936551278091, 0.153773206124018, 0.114176809455260, 0.0703805598130746,  
0.0360158405664981, 0.0152997625170166, 0.00539518664166239, 0.00157919458146516  
]]

```
0.000898004474608666  
0.00183994439586878  
0.00354848512770082  
0.00649840037963117  
0.0113775380135207  
0.0190977404119253  
0.0306849321315443  
0.0469650123895131  
0.0679799685561466  
0.0921305746492580  
0.115358523993168  
0.131320635534092  
0.133629557426564  
0.119659228168838  
0.0930574795236851  
0.0622102080795515  
0.0354805648736453  
0.0171737171587488  
0.00703259262474752  
0.00243391806336881  
0.000713145642446410
```

(26)

**for j from 1 to NM18 do**

*dataplot*([PAM18[j,..], PA18[ ..]], *caption* = *typeset*("Output P( A | M18=", j, " ), P(A18)"));

**end do;**

*j* := 1

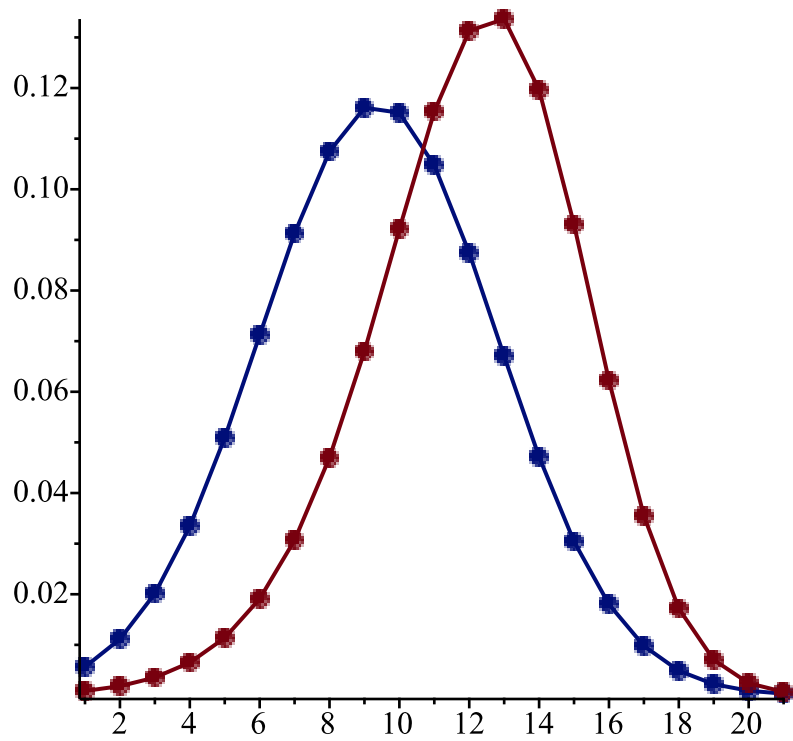

Output  $P(A | M18=1)$ ,  $P(A18)$

$j := 2$

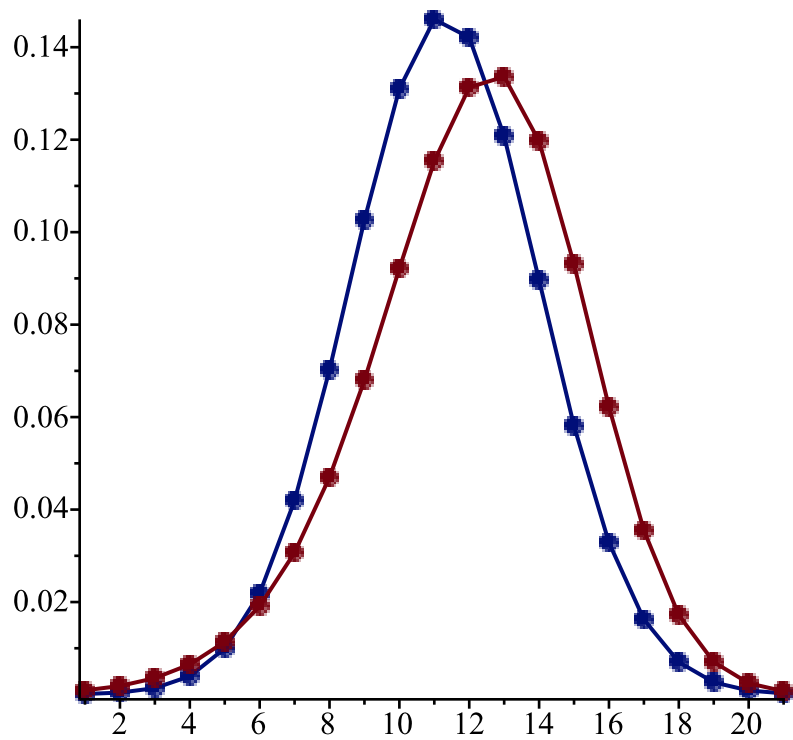

Output  $P(A | M18=2)$ ,  $P(A18)$

$j := 3$

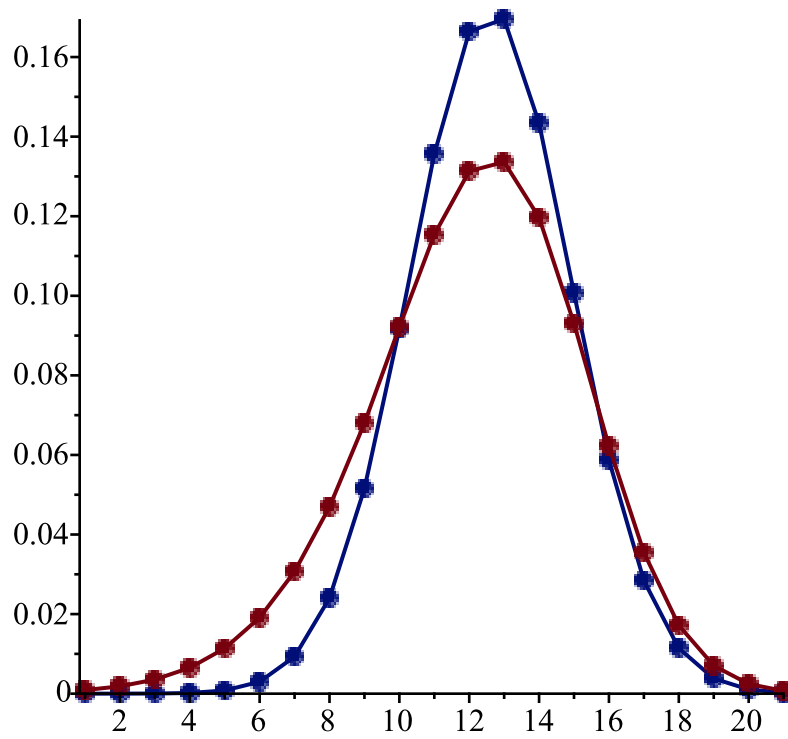

Output  $P(A | M18=3), P(A18)$

$j := 4$

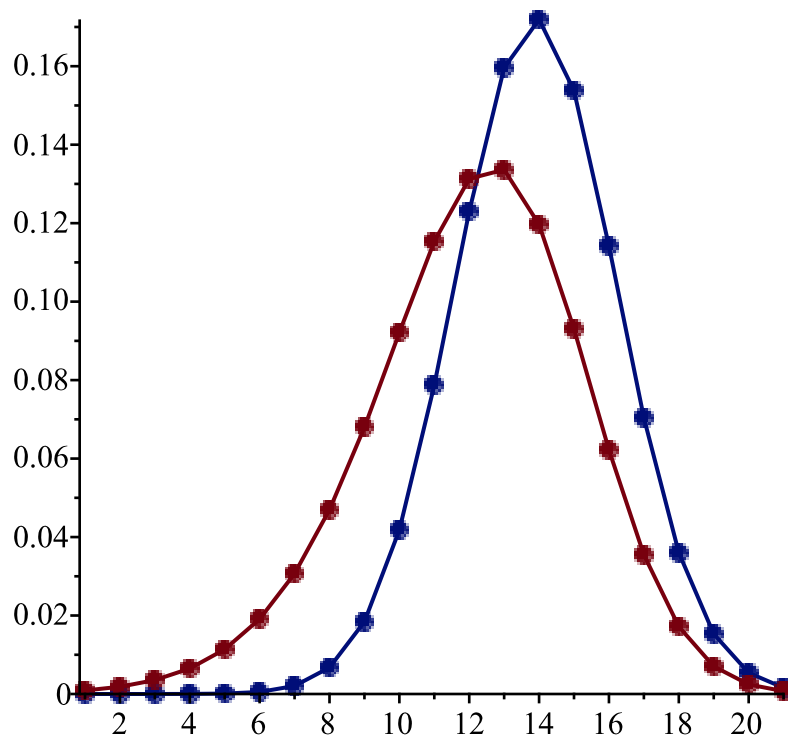

Output  $P(A | M18=4), P(A18)$

$j := 5$

#NMenM18, X[3, 1], X[3, 2], X[3, 3], X[3, 4], PA18;  
E18, S18;

$$\begin{bmatrix} 18.9 \\ 20.8 \\ 22.1 \\ 23.4 \end{bmatrix}, \begin{bmatrix} 3.4 \\ 2.7 \\ 2.3 \\ 2.3 \end{bmatrix} \quad (28)$$

E48, S48;

$$\begin{bmatrix} 0 \\ 0 \\ 0 \\ 0 \end{bmatrix}, \begin{bmatrix} 4.0 \\ 2.9 \\ 1.9 \\ 2.2 \end{bmatrix} \quad (29)$$

Transpose(PAM18);

$$\begin{aligned} & [[ 0.00564844833254520, 0.000110242842916382, 6.24520799352849 \times 10^{-7}, \\ & \quad 3.21369419584182 \times 10^{-8} ], \\ & [ 0.0111328191498919, 0.000416603605773819, 4.93742613854645 \times 10^{-6}, \\ & \quad 3.23857659622509 \times 10^{-7} ], \\ & [ 0.0201361776569166, 0.00137451057945856, 0.0000323908504886411, 2.70784924448310 \\ & \quad \times 10^{-6} ], \\ & [ 0.0334230554075498, 0.00395945603943091, 0.000176338416941091, \\ & \quad 0.0000187867684436322 ], \\ & [ 0.0509112381874338, 0.00995850985462634, 0.000796722955280451, \\ & \quad 0.000108161390448948 ], \\ & [ 0.0711673076826027, 0.0218691856493611, 0.00298768097303431, \\ & \quad 0.000516795327545868 ], \\ & [ 0.0912951184498982, 0.0419331281673903, 0.00929941487713924, \\ & \quad 0.00204937978907322 ], \\ & [ 0.107476941523388, 0.0702059903248139, 0.0240268299595985, 0.00674547802602003 ], \\ & [ 0.116113882188486, 0.102633239241318, 0.0515321510228085, 0.0184295753353912 ], \\ & [ 0.115120926585945, 0.131009369536009, 0.0917526749169538, 0.0417977402057587 ], \\ & [ 0.104743159916656, 0.146022370684465, 0.135622434190326, 0.0786944384971100 ], \\ & [ 0.0874577117623363, 0.142115078950718, 0.166427874927243, 0.122999672701846 ], \\ & [ 0.0670148687903280, 0.120771483531935, 0.169553710536360, 0.159603806092293 ], \\ & [ 0.0471242266689881, 0.0896170416887110, 0.143408759629362, 0.171936551278091 ], \end{aligned} \quad (30)$$

```
[ 0.0304100048035884, 0.0580652109584672, 0.100699460566248, 0.153773206124018 ],
[ 0.0180088889447834, 0.0328500952540569, 0.0587020371326155, 0.114176809455260 ],
[ 0.00978710687525741, 0.0162273389822779, 0.0284080180405931, 0.0703805598130746
],
[ 0.00488109585823993, 0.00699909229884732, 0.0114123083696718,
0.0360158405664981 ],
[ 0.00223395474826060, 0.00263580007749242, 0.00380566096890822,
0.0152997625170166 ],
[ 0.000938261063375356, 0.000866664711275611, 0.00105338335374927,
0.00539518664166239 ],
[ 0.000361629118087348, 0.000248798792775617, 0.000241999870858156,
0.00157919458146516 ]]
```

```
dataplot( 10 ..30, [PAM18[1,..], PAM18[2,..], PAM18[3,..], PAM18[4,..], ], linestyle = [ dot, dash,
dashdot, solid], color = "black", caption = typeset("P(A = a | M = m); a = 10y, ... ,30y "), legend
= [ typeset("m = A"), typeset("m = B"), typeset("m = C"), typeset("m = D") ] );
```

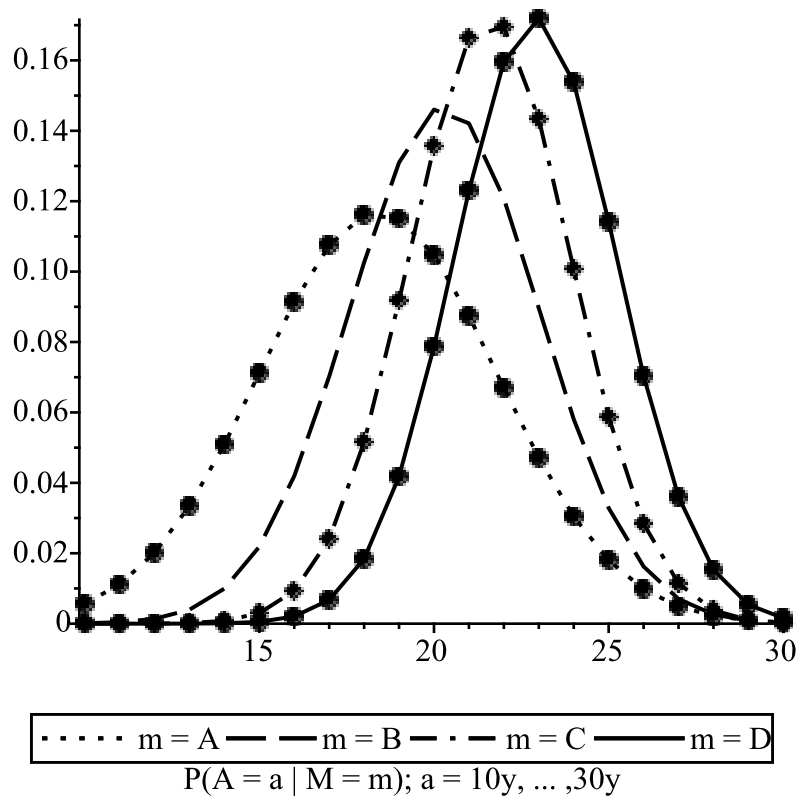

```
for i from 1 to NA do #Alter A
```

```
for j from 1 to NM18 do #Merkmal M18
```

$$PM18A[i,j] := \frac{PAM18[j,i] \cdot PM18[j]}{PA18[i]} ;$$

```
od:
```

**for j from 1 to NM28 do** # Merkmal M28

$$PM28A[i,j] := \frac{PAM28[j,i] \cdot PM28[j]}{PA28[i]} ;$$

**od:**

**for j from 1 to NM38 do** # Merkmal M38

$$PM38A[i,j] := \frac{PAM38[j,i] \cdot PM38[j]}{PA38[i]} ;$$

**od:**

**for j from 1 to NM48 do** # Merkmal M48

$$PM48A[i,j] := \frac{PAM48[j,i] \cdot PM48[j]}{PA48[i]} ;$$

**od:**

**od:**

*add(PA18[i], i = 1 ..NA);*

0.999090171618573

(31)

**for i from 1 to NA do** *SPAM18 := VectorAdd(SPAM18, PAM18[ ..., i])* **end do:**  
**for i from 1 to NA do** *SPAM28 := VectorAdd(SPAM28, PAM28[ ..., i])* **end do:**  
**for i from 1 to NA do** *SPAM38 := VectorAdd(SPAM38, PAM38[ ..., i])* **end do:**  
**for i from 1 to NA do** *SPAM48 := VectorAdd(SPAM48, PAM48[ ..., i])* **end do:**  
*#SPAM18;SPAM28; SPAM38; SPAM48;*  
*#Transpose(PAM18); Transpose(PAM28); Transpose(PAM38); Transpose(PAM48);*  
*#PMA18;PMA28;PMA38;PMA48;*  
**for j from 1 to NM18 do** *SPMA18 := VectorAdd(SPMA18, PM18A[ ..., j])* **end do:**  
**for j from 1 to NM28 do** *SPMA28 := VectorAdd(SPMA28, PM28A[ ..., j])* **end do:**  
**for j from 1 to NM38 do** *SPMA38 := VectorAdd(SPMA38, PM38A[ ..., j])* **end do:**  
**for j from 1 to NM48 do** *SPMA48 := VectorAdd(SPMA48, PM48A[ ..., j])* **end do:**  
*#SPMA18;SPMA28; SPMA38; SPMA48;*

*#####*  
*#####*  
*#####*  
*#####*  
*# Berechnung P(M|A) aus KREITNER 1997 Claviculae*  
*#####*



```
#####  
# #####  
#####
```

```
# INPUT JOINT HISTOGRAM      P(A,M)·N  
A := Matrix(21, 4, 0.) :
```

```
# #####  
#Bestückung der Matrix A #####  
# ##### Weglassen der Niveaus A <= 9 J ##### Also: N = 279 - 12 = 267  
#####  
# ##### M = m1  
A[1, 1] := 1. :  
A[2, 1] := 2. : A[3, 1] := 2. : A[4, 1] := 6. : A[5, 1] := 4. : A[6, 1] := 1. : A[7, 1] := 1. :  
# ##### M = m2  
A[4, 2] := 1. : A[5, 2] := 4. : A[6, 2] := 12. : A[7, 2] := 12. : A[8, 2] := 8. : A[9, 2] := 8. :  
A[10, 2] := 4. : A[11, 2] := 1. : A[13, 2] := 1. :  
# ##### M = m3  
A[7, 3] := 1. : A[8, 3] := 4. : A[9, 3] := 6. : A[10, 3] := 14. : A[11, 3] := 18. : A[12, 3] := 14. :  
A[13, 3] := 12. : A[14, 3] := 11. : A[15, 3] := 5. : A[16, 3] := 3. : A[17, 3] := 2. :  
# ##### M = m4  
A[13, 4] := 1. : A[14, 4] := 9. : A[15, 4] := 11. : A[16, 4] := 25. : A[17, 4] := 21. :  
A[18, 4] := 12. : A[19, 4] := 19. : A[20, 4] := 10. : A[21, 4] := 1. :
```

A

$$\begin{bmatrix}
 1. & 0. & 0. & 0. \\
 2. & 0. & 0. & 0. \\
 2. & 0. & 0. & 0. \\
 6. & 1. & 0. & 0. \\
 4. & 4. & 0. & 0. \\
 1. & 12. & 0. & 0. \\
 1. & 12. & 1. & 0. \\
 0. & 8. & 4. & 0. \\
 0. & 8. & 6. & 0. \\
 0. & 4. & 14. & 0. \\
 0. & 1. & 18. & 0. \\
 0. & 0. & 14. & 0. \\
 0. & 1. & 12. & 1. \\
 0. & 0. & 11. & 9. \\
 0. & 0. & 5. & 11. \\
 0. & 0. & 3. & 25. \\
 0. & 0. & 2. & 21. \\
 0. & 0. & 0. & 12. \\
 0. & 0. & 0. & 19. \\
 0. & 0. & 0. & 10. \\
 0. & 0. & 0. & 1.
 \end{bmatrix}
 \tag{32}$$

$$\text{interface}(rtablesiz = 100)$$

$$100$$

$$\tag{33}$$

*eval(A) :*

*#NA := 21;*  
*NM2 := 4;*

$$NM2 := 4$$

$$\tag{34}$$

*# Age axis*  
*T := Vector(NA, 0.)*



```
p1 := dataplot(T, (A[ ..., 1] / SCol(1)), linestyle = dot, color = "black");
```

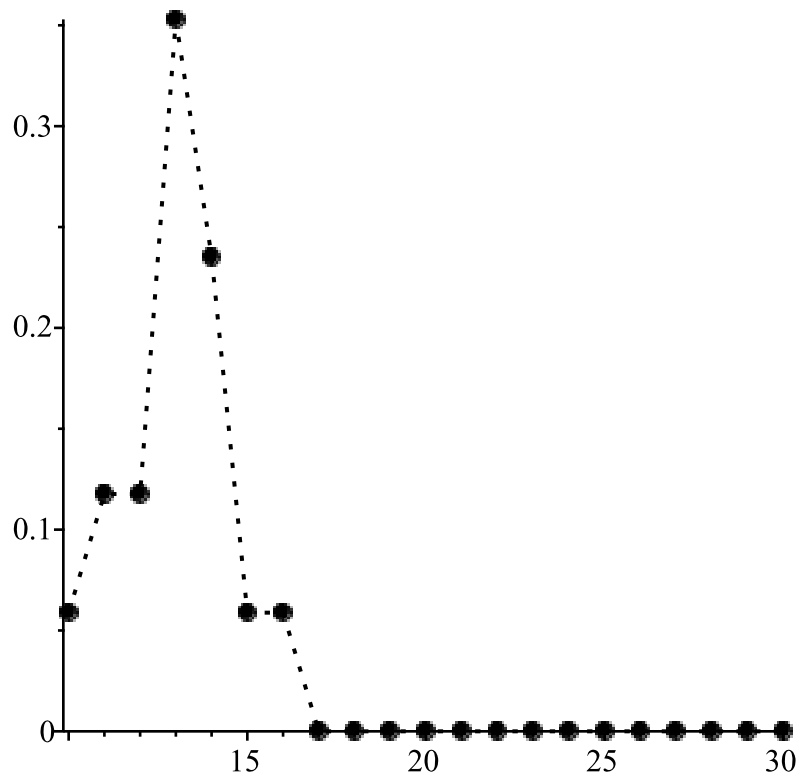

```
p2 := dataplot(T, (A[ ..., 2] / SCol(2)), linestyle = dash, color = "black");
```

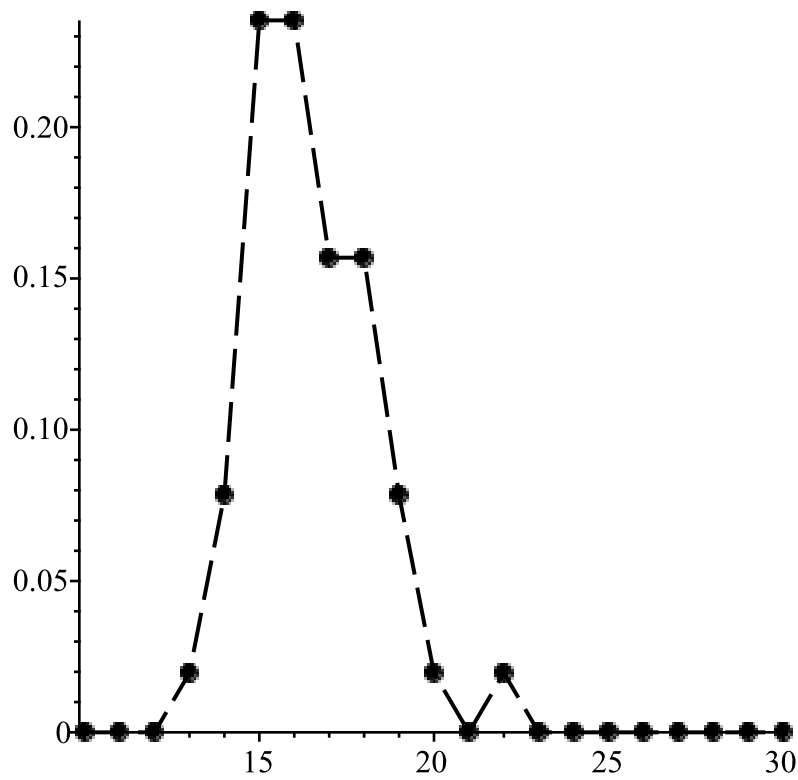

```
p3 := dataplot(T, (A[ ..., 3] / SCol(3)), linestyle=longdash, color="black");
```

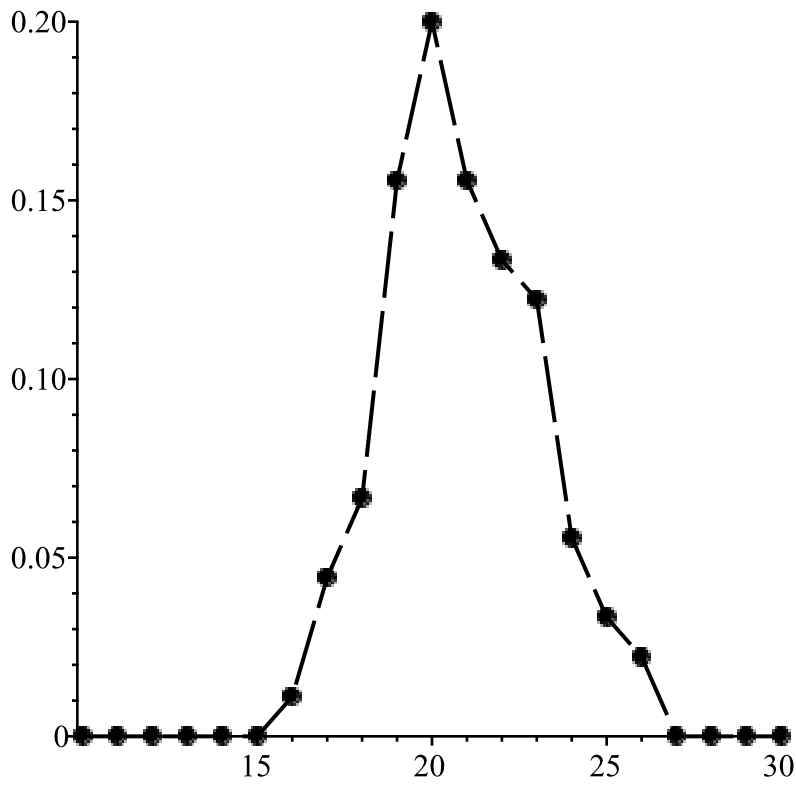

```
p4 := dataplot(T, (A[ ..., 4] / SCol(4)), linestyle=solid, color="black");
```

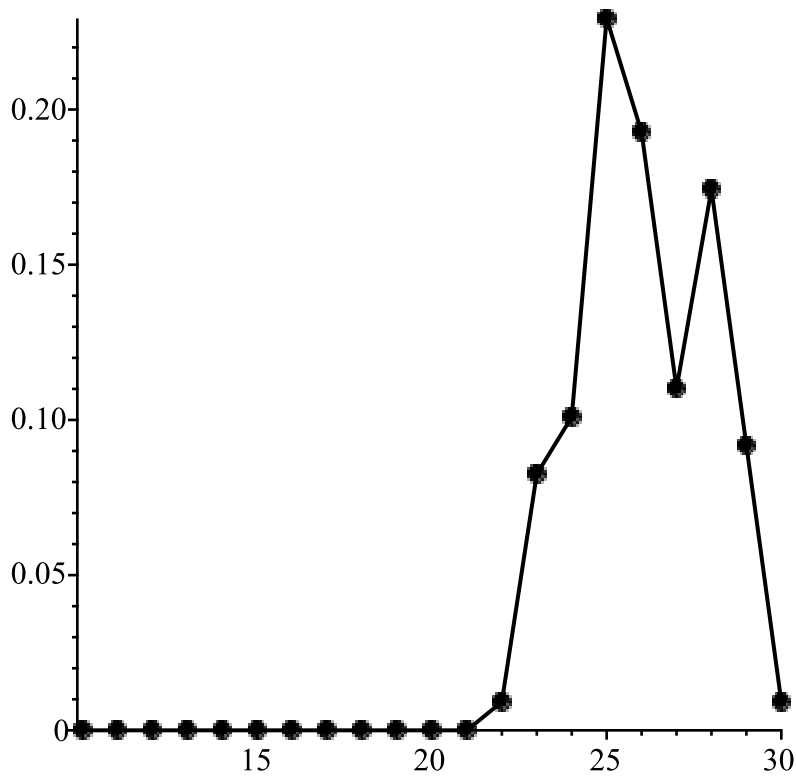

```

dataplot(10..30, [ ( A[ ..., 1 ] / SCol(1) ), ( A[ ..., 2 ] / SCol(2) ), ( A[ ..., 3 ] / SCol(3) ), ( A[ ..., 4 ] / SCol(4) ) ], linestyle = [ dot, dash,
dashdot, solid ], color = "black", caption
= typeset("P[A = a | M = m]; a = 10y, ... ,30y; m = S1, S2, S3, S4") );

```

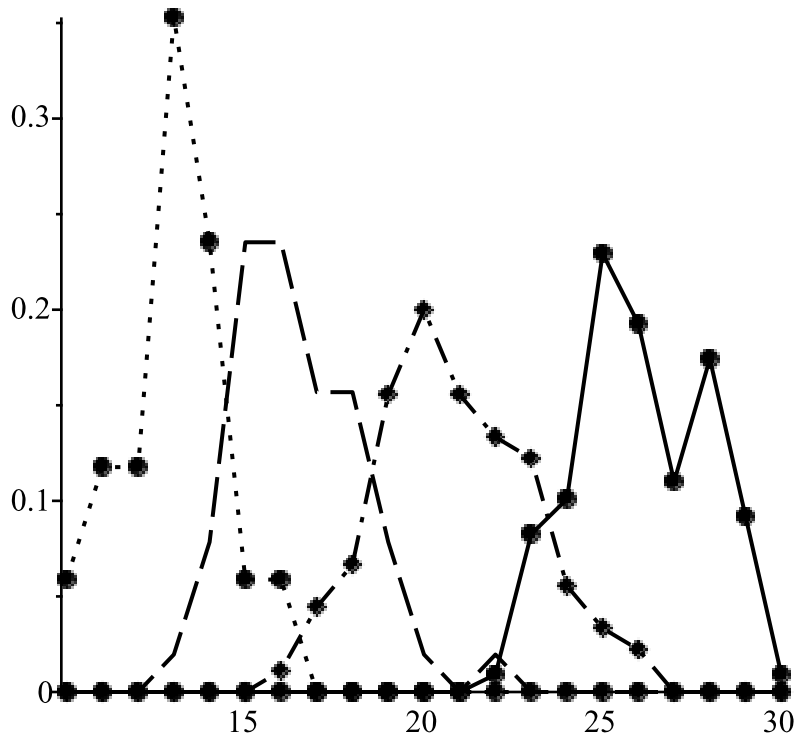

```

P[A = a | M = m]; a = 10y, ... ,30y; m = S1, S2, S3, S4
dataplot(10..30, [ ( A[ ..., 1 ] / SCol(1) ), ( A[ ..., 2 ] / SCol(2) ), ( A[ ..., 3 ] / SCol(3) ), ( A[ ..., 4 ] / SCol(4) ) ], linestyle = [ dot, dash,
dashdot, solid ], color = "black", caption = typeset("P(A = a | M = m); a = 10y, ... ,30y "), legend
= [ typeset("m = S1"), typeset("m = S2"), typeset("m = S3"), typeset("m = S4") ] );

```

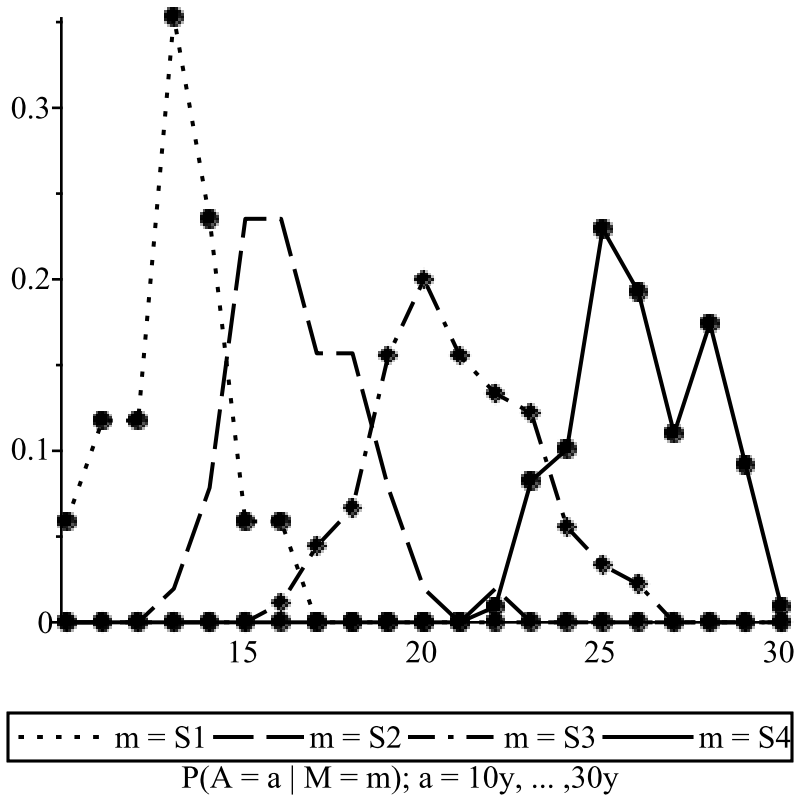

```

PMA := Matrix(NA, NM2, 0.) : PAM := Matrix(NA, NM2, 0.) :
for i from 1 to NA do ( PMA[i,..] :=  $\frac{A[i,..]}{SRows[i]}$  ) end do :
# PAM
for k from 1 to NM2 do ( PAM[ .., k] :=  $\frac{A[ .., k]}{SCol[k]}$  ) end do :
PAM;

```

|                    |                    |                    |                     |
|--------------------|--------------------|--------------------|---------------------|
| 0.0588235294117647 | 0.                 | 0.                 | 0.                  |
| 0.117647058823529  | 0.                 | 0.                 | 0.                  |
| 0.117647058823529  | 0.                 | 0.                 | 0.                  |
| 0.352941176470588  | 0.0196078431372549 | 0.                 | 0.                  |
| 0.235294117647059  | 0.0784313725490196 | 0.                 | 0.                  |
| 0.0588235294117647 | 0.235294117647059  | 0.                 | 0.                  |
| 0.0588235294117647 | 0.235294117647059  | 0.0111111111111111 | 0.                  |
| 0.                 | 0.156862745098039  | 0.0444444444444444 | 0.                  |
| 0.                 | 0.156862745098039  | 0.0666666666666667 | 0.                  |
| 0.                 | 0.0784313725490196 | 0.1555555555555556 | 0.                  |
| 0.                 | 0.0196078431372549 | 0.2000000000000000 | 0.                  |
| 0.                 | 0.                 | 0.1555555555555556 | 0.                  |
| 0.                 | 0.0196078431372549 | 0.1333333333333333 | 0.00917431192660551 |
| 0.                 | 0.                 | 0.1222222222222222 | 0.0825688073394495  |
| 0.                 | 0.                 | 0.0555555555555556 | 0.100917431192661   |
| 0.                 | 0.                 | 0.0333333333333333 | 0.229357798165138   |
| 0.                 | 0.                 | 0.0222222222222222 | 0.192660550458716   |
| 0.                 | 0.                 | 0.                 | 0.110091743119266   |
| 0.                 | 0.                 | 0.                 | 0.174311926605505   |
| 0.                 | 0.                 | 0.                 | 0.0917431192660551  |
| 0.                 | 0.                 | 0.                 | 0.00917431192660551 |

(37)

*# Berechne kumulative bedingte Altersverteilung*

*CAM := Matrix(NA, NM2, 0.) :*

**for i from 1 to NA do** ( *CAM*[*i*,..] := *add*(*PAM*[*j*,..],*j* = 1 ..*i*) : ) **end do**:

*# Altersvektor T*

*T := Vector(NA, fill = 0.) :*

**for i from 1 to NA by 1 do** *T*(*i*) := *convert*(*i* + *A*Min, *float*) **end do** :

*#T;*

*#Ergebnisvektoren E, S*

*E := Vector(NM2, 0.) :*

*S := Vector(NM2, 0.) :*

*# Hilfsfeld für EW, S*

*Aux := Matrix(NA, NM2, 0.) :*



```

for i from 1 to NA do
  for j from 1 to NM2 do ( Aux[i,j] := A[i,j]·T[i] : ) end do:
end do:
# Berechne Schätzer des bedingten EW von A unter der Bedingung einer festen Merkmalsausprägung
for j from 1 to NM2 do (  $E[j] := \frac{\text{add}(Aux[i,j], i = 1 ..NA)}{\text{add}(A[i,j], i = 1 ..NA)}$  : ) end do:
Aux := Matrix(NA, NM2, 0.) :
for i from 1 to NA do
  for j from 1 to NM2 do ( Aux[i,j] := A[i,j]·((T[i] - E[j]))2 : ) end do:
end do:
# Berechne Schätzer des bedingten EW von A unter der Bedingung einer festen Merkmalsausprägung
for j from 1 to NM2 do (  $S[j] := \sqrt{\frac{\text{add}(Aux[i,j], i = 1 ..NA)}{\text{add}(A[i,j], i = 1 ..NA) - 1.}}$  : ) end do:

```

*E*;

$$\begin{bmatrix} 13.00000000 \\ 16.45098039 \\ 20.84444444 \\ 26.05504587 \end{bmatrix} \quad (38)$$

*S*;

$$\begin{bmatrix} 1.50000000 \\ 1.758564477 \\ 2.156313496 \\ 1.824904170 \end{bmatrix} \quad (39)$$

```

#####
#####
# Berechnung PAM rekonstruiert
PAMR := Matrix(NA, NM2, 0.) :
for i from 2 to NA do (PAMR[i, 1] := CDF(Normal(E(1), S(1)), T(i)) - CDF(Normal(E(1),
  S(1)), T(i - 1)) ) end do:
PAMR[1, 1] := CDF(Normal(E(1), S(1)), T(1)) - CDF(Normal(E(1), S(1)), T(1) - 1.)
PAMR1,1 := 0.0189197513805895

```

(40)

$$\begin{aligned}
&\text{for } i \text{ from } 2 \text{ to } NA \text{ do } (PAMR[i, 2] := CDF(\text{Normal}(E(2), S(2)), T(i)) - CDF(\text{Normal}(E(2), \\
&\quad S(2)), T(i-1))) \text{ end do:} \\
&PAMR[1, 2] := CDF(\text{Normal}(E(2), S(2)), T(1)) - CDF(\text{Normal}(E(2), S(2)), T(1) - 1.) \\
&\quad PAMR_{1,2} := 0.000110745940469459 \tag{41}
\end{aligned}$$

$$\begin{aligned}
&\text{for } i \text{ from } 2 \text{ to } NA \text{ do } (PAMR[i, 3] := CDF(\text{Normal}(E(3), S(3)), T(i)) - CDF(\text{Normal}(E(3), \\
&\quad S(3)), T(i-1))) \text{ end do:} \\
&PAMR[1, 3] := CDF(\text{Normal}(E(3), S(3)), T(1)) - CDF(\text{Normal}(E(3), S(3)), T(1) - 1.) \\
&\quad PAMR_{1,3} := 2.26549502642103 \times 10^{-7} \tag{42}
\end{aligned}$$

$$\begin{aligned}
&\text{for } i \text{ from } 2 \text{ to } NA \text{ do } (PAMR[i, 4] := CDF(\text{Normal}(E(4), S(4)), T(i)) - CDF(\text{Normal}(E(4), \\
&\quad S(4)), T(i-1))) \text{ end do:} \\
&PAMR[1, 4] := CDF(\text{Normal}(E(4), S(4)), T(1)) - CDF(\text{Normal}(E(4), S(4)), T(1) - 1.) \\
&\quad PAMR_{1,4} := 6.93385961580379 \times 10^{-19} \tag{43}
\end{aligned}$$

*PAMR;*

$$\begin{aligned}
&[[ 0.0189197513805895, 0.000110745940469459, 2.26549502642103 \times 10^{-7}, 6.93385961580379 \tag{44} \\
&\quad \times 10^{-19}], \\
&[ 0.0684610877776887, 0.000846587771745780, 2.24633721723908 \times 10^{-6}, \\
&\quad 7.86496286666355 \times 10^{-17} ], \\
&[ 0.161281317821055, 0.00471773570275084, 0.0000180180189160761, 6.62882110696384 \\
&\quad \times 10^{-15} ], \\
&[ 0.247507462453077, 0.0191724468644406, 0.000116926461977463, 4.15253699931496 \\
&\quad \times 10^{-13} ], \\
&[ 0.247507462453077, 0.0568393306037088, 0.000613964565554107, 1.93399903093889 \\
&\quad \times 10^{-11} ], \\
&[ 0.161281317821055, 0.122961036322860, 0.00260883373905027, 6.69884984102871 \\
&\quad \times 10^{-10} ], \\
&[ 0.0684610877776887, 0.194143242550816, 0.00897151941678053, 1.72618769641762 \\
&\quad \times 10^{-8} ], \\
&[ 0.0189197513805894, 0.223752368501610, 0.0249713070160220, 3.31030097034565 \\
&\quad \times 10^{-7} ], \\
&[ 0.00340132023439299, 0.188243838265781, 0.0562608029522376, 4.72595900193029 \\
&\quad \times 10^{-6} ], \\
&[ 0.000397389091363665, 0.115600784248295, 0.102609492485784, \\
&\quad 0.0000502467084272176 ], \\
&[ 0.0000301406150965411, 0.0518119266071710, 0.151498040428796,
\end{aligned}$$

```

0.000397988470292000 ],
[ 1.48241370290236 × 10-6, 0.0169447589970415, 0.181083190125853,
0.00234921538119809 ],
[ 4.72264459761007 × 10-8, 0.00404254937383941, 0.175229521704889,
0.0103371127891571 ],
[ 9.73503722079272 × 10-10, 0.000703302563508146, 0.137275569760301,
0.0339172462348912 ],
[ 1.29717347974179 × 10-11, 0.0000891927401124315, 0.0870617465222639,
0.0830022444189520 ],
[ 1.11577413974828 × 10-13, 8.24209356586891 × 10-6, 0.0446985670123755,
0.151526454516017 ],
[ 6.66133814775094 × 10-16, 5.54726649837356 × 10-7, 0.0185767141282634,
0.206382664049904 ],
[ 0., 2.71809245111498 × 10-8, 0.00624918980373557, 0.209736428143082 ],
[ 0., 9.69181734866709 × 10-10, 0.00170146325019693, 0.159034734200703 ],
[ 0., 2.51373366566554 × 10-11, 0.000374908033637156, 0.0899706515551915 ],
[ 0., 4.74065231514942 × 10-13, 0.0000668474757897775, 0.0379705270177421 ]]

```

*# Rekonstruktion der Tafel A aus Tab 1*

*AR := Matrix(NA, NM2, 0.) :*

**for i from 1 to NA do** (*AR(i, 1) := PAMR(i, 1) · SCol(1)*) **end do:**

**for i from 1 to NA do** (*AR(i, 2) := PAMR(i, 2) · SCol(2)*) **end do:**

**for i from 1 to NA do** (*AR(i, 3) := PAMR(i, 3) · SCol(3)*) **end do:**

**for i from 1 to NA do** (*AR(i, 4) := PAMR(i, 4) · SCol(4)*) **end do:**

*# Graphische Darstellung*

*# Balkendiagramm*

**for i from 1 to NA do** (*dataplot( {A[i,..], AR[i,..]}, bar)*) **end do:**

*# Balkendiagramm*

**for i from 1 to NM2 do** (*dataplot( {A[ .., i], AR[ .., i]}, bar)*) **end do:**

*# Berechnung rekonstruierte bedingte Wahrscheinlichkeit P(M | A) aus P(A | M)*

*PMAR := Matrix(NA, NM2, 0.) :*

**for**  $i$  **from** 1 **to**  $NA$  **do**  $\left( PMAR[i, 1] := \frac{AR[i, 1]}{SRows(i)} \right)$  **end do**:

**for**  $i$  **from** 1 **to**  $NA$  **do**  $\left( PMAR[i, 2] := \frac{AR[i, 2]}{SRows(i)} \right)$  **end do**:

**for**  $i$  **from** 1 **to**  $NA$  **do**  $\left( PMAR[i, 3] := \frac{AR[i, 3]}{SRows(i)} \right)$  **end do**:

**for**  $i$  **from** 1 **to**  $NA$  **do**  $\left( PMAR[i, 4] := \frac{AR[i, 4]}{SRows(i)} \right)$  **end do**:

$PMAR$ ;

$[ [ 0.321635773470021, 0.00564804296394241, 0.0000203894552377893, 7.55790698122613$  **(45)**  
 $\times 10^{-17},$   
 $[ 0.581919246110354, 0.0215879881795174, 0.000101085174775759, 4.28640476233163$   
 $\times 10^{-15},$   
 $[ 1.37089120147897, 0.120302260420146, 0.000810810851223423, 3.61270750329529$   
 $\times 10^{-13},$   
 $[ 0.601089551671759, 0.139684970012353, 0.00150334022542453, 6.46609332750472$   
 $\times 10^{-12},$   
 $[ 0.525953357712789, 0.362350732598644, 0.00690710136248370, 2.63507367965423$   
 $\times 10^{-10},$   
 $[ 0.210906338689072, 0.482385604035835, 0.0180611566549634, 5.61672794363177$   
 $\times 10^{-9},$   
 $[ 0.0831313208729077, 0.707236097863686, 0.0576740533935892, 1.34396042078229$   
 $\times 10^{-7},$   
 $[ 0.0268029811225017, 0.950947566131843, 0.187284802620165, 3.00685671473063$   
 $\times 10^{-6},$   
 $[ 0.00413017457033435, 0.685745410825344, 0.361676590407241,$   
 $0.0000367949665150287 ],$   
 $[ 0.000375311919621239, 0.327535555370169, 0.513047462428922,$   
 $0.000304271734364818 ],$   
 $[ 0.0000269679187705894, 0.139074118787670, 0.717622296767982,$   
 $0.00228319701378042 ],$   
 $[ 1.80007378209573 \times 10^{-6}, 0.0617273363463655, 1.16410622223762,$   
 $0.0182903197536137 ],$   
 $[ 5.73463986852651 \times 10^{-8}, 0.0147264298618436, 1.12647549667429,$   
 $0.0804818067155802 ],$   
 $[ 8.27478163767381 \times 10^{-10}, 0.00179342153694577, 0.617740063921355,$

```

0.184848991980157 ],
[ 1.37824682222565 × 10-11, 0.000284301859108375, 0.489722324187735,
0.565452790104111 ],
[ 6.77434299132886 × 10-14, 0.0000150123847092612, 0.143673965396921,
0.589870840794493 ],
[ 4.92359776138113 × 10-16, 1.23004604963935 × 10-6, 0.0726914900671179,
0.978074364410417 ],
[ 0., 1.15518929172387 × 10-7, 0.0468689235280167, 1.90510588896633 ],
[ 0., 2.60148781464222 × 10-9, 0.00805956276409073, 0.912357159361925 ],
[ 0., 1.28200416948943 × 10-10, 0.00337417230273440, 0.980680101951587 ],
[ 0., 2.41773268072620 × 10-11, 0.00601627282107997, 4.13878744493389 ]]

```

#

```

#####
#####

```

```

# #####
# #####
# #####
# #####

```

# Berechnung  $P(A|M1\&M2)$  aus OLZE 2012 3rd molar M1 und KREITNER 1997 Claviculae

M2

M2

(46)

```

# #####
# #####
# #####
# #####

```

# NA := 21; # AMin := 9;  
NM2 := 4;

NM2 := 4

(47)

NRows := NA :  
NCols := NM18 :  
PAM118 := Matrix(NRows, NCols, 0.) :

NRows := NA :  
NCols := NM18·NM2

NCols := 16

(48)

#PAM118:=Matrix(NRows, NCols, 0.)

PAM118M2 := Matrix(NRows, NCols, .0) :

# Konstanten für Prior  $P(A)$  mit Dichte  $f$

$a0 := 18.$

$$a0 := 18. \quad (49)$$

$aL := 10.$

$$aL := 10. \quad (50)$$

$aU := 30.$

$$aU := 30. \quad (51)$$

$z := 0.5$

$$z := 0.5 \quad (52)$$

# A priori age distribution  $P(A)$

#Prior  $f0$  lower

$$f0 := x \rightarrow \begin{cases} \frac{1.}{a0 - aL} & x < a0 \text{ and } x \geq aL \\ 0 & x \geq a0 \text{ or } x < aL \end{cases}$$

$$f0 := x \mapsto \begin{cases} \frac{1.}{a0 - aL} & aL \leq x < a0 \\ 0 & a0 \leq x \text{ or } x < aL \end{cases} \quad (53)$$

#Prior  $f1$  higher

$$f1 := x \rightarrow \begin{cases} \frac{1.}{aU - a0} & x \geq a0 \text{ and } x \leq aU \\ 0 & x < a0 \text{ or } x > aU \end{cases}$$

$$f1 := x \mapsto \begin{cases} \frac{1.}{aU - a0} & a0 \leq x \leq aU \\ 0 & x < a0 \text{ or } aU < x \end{cases} \quad (54)$$

#Prior  $P(A)$  Dichte  $f$

$$f := x \rightarrow z \cdot f0(x) + (1. - z) \cdot f1(x)$$

$$f := x \mapsto z \cdot f0(x) + (1. - z) \cdot f1(x) \quad (55)$$

# Fill Matrix PAM118M2 using BAYES-Theorem

# Build age vector

**Age** := **Vector**(NA + 1, 0.) :

# Build age vector for graphics

**AgeGraph** := **Vector**(NA, 0.) :

**for**  $nx$  **from** 1 **to** NA + 1 **do** **Age**( $nx$ ) := **convert**( $nx$  + AMin, float) **end do**:

**for**  $nx$  **from** 1 **to** NA **do** **AgeGraph**( $nx$ ) := **convert**( $nx$  + AMin, float) **end do**:

**for**  $nx$  **from** 1 **to**  $NA$  **do**  
     **for**  $ny1$  **from** 1 **to**  $NM18$  **do**  
         **for**  $ny2$  **from** 1 **to**  $NM2$  **do**  
              $Nenner := 0. :$   
             **for**  $nxb$  **from** 1 **to**  $NA$  **do**

$$Nenner := Nenner + PMA[nxb, ny2] \cdot PM18A[nxb, ny1] \cdot \int_{Age(nxb)}^{Age(nxb + 1)} f(x) dx :$$

**end do:**

$$\frac{PAM118M2[nx, NM2 \cdot (ny1 - 1) + ny2] := \left( PMA[nx, ny2] \cdot PM18A[nx, ny1] \cdot \int_{Age(nx)}^{Age(nx + 1)} f(x) dx \right)}{Nenner} :$$

**end do;**

**end do:**

**end do:**

$PAM118M2;$

[ [ 0.249997423419490, 0., 0., 0., 0.0652262529032548, 0., 0., 0., 0.00665759017448497, 0., 0., 0., 0.00237656507951668, 0., 0., 0. ], (56)  
     [ 0.240483524548093, 0., 0., 0., 0.120300893364359, 0., 0., 0., 0.0256888441847405, 0., 0., 0., 0.0116888864088800, 0., 0., 0. ],  
     [ 0.225537580789764, 0., 0., 0., 0.205804858972756, 0., 0., 0., 0.0873832138244554, 0., 0., 0., 0.0506763300898452, 0., 0., 0. ],  
     [ 0.175217615779217, 0.0645691749864672, 0., 0., 0.277480709823070, 0.0188285528791450, 0., 0., 0.222660066118416, 0.00293205812832911, 0., 0., 0.164559322625105, 0.000950635461502835, 0., 0. ],  
     [ 0.0889242562286055, 0.196616048064523, 0., 0., 0.232523361699260, 0.0946677355881637, 0., 0., 0.335179686718473, 0.0264825123433955, 0., 0., 0.315658606157908, 0.0109410853164202, 0., 0. ],  
     [ 0.0113930517772168, 0.302287395250917, 0., 0., 0.0468012874013218, 0.228651703735011, 0., 0., 0.115201340976952, 0.109224552272834, 0., 0., 0.138234645787863, 0.0574964353416756, 0., 0. ],  
     [ 0.00844654745761288, 0.224108946378263, 0.0579946254051866, 0., 0.0518626358359782, 0.253379355623237, 0.0228557384156342, 0., 0.207229258002478,

0.196477946621132, 0.00538982231657125, 0., 0.316805643850882, 0.131770115326251,  
0.00148139094861305, 0. ],  
[ 0., 0.134070488869141, 0.208167533840413, 0., 0., 0.215573013156485,  
0.116672813838102, 0., 0., 0.257965078675667, 0.0424592977029604, 0., 0.,  
0.220400951660781, 0.0148667992305054, 0. ],  
[ 0., 0.0571817539622176, 0.133176787860478, 0., 0., 0.124412406690894,  
0.101002059713709, 0., 0., 0.218422889302598, 0.0539263833479949, 0., 0.,  
0.237723160069630, 0.0240528622941424, 0. ],  
[ 0., 0.0162678559326317, 0.176810544606180, 0., 0., 0.0455701781352950,  
0.172645016303699, 0., 0., 0.111594123485017, 0.128573436943220, 0., 0.,  
0.154707612216152, 0.0730489090469921, 0. ],  
[ 0., 0.00279972074331909, 0.156493758095472, 0., 0., 0.00960750826529482,  
0.187192544407025, 0., 0., 0.0312009004763713, 0.184876417514335, 0., 0.,  
0.0550954740367217, 0.133789624837322, 0. ],  
[ 0., 0., 0.121162233148699, 0., 0., 0., 0.168930132924745, 0., 0., 0.,  
0.210365182004278, 0., 0., 0., 0.193901050253876, 0. ],  
[ 0., 0.00209861581252078, 0.0782031031925028, 0.0185084132772691, 0.,  
0.00930954592647504, 0.120924700496728, 0.0225873566188548, 0.,  
0.0456999386946557, 0.180525579230019, 0.0197629111703324, 0., 0.130914530570865,  
0.211935205653568, 0.00722547529960384 ],  
[ 0., 0., 0.0394060463083730, 0.0915670315555241, 0., 0., 0.0642994169328226,  
0.117920277739679, 0., 0., 0.109414011290593, 0.117602399251043, 0., 0.,  
0.163603987746016, 0.0547631310337393 ],  
[ 0., 0., 0.0185787871749585, 0.116082429337647, 0., 0., 0.0304378998303094,  
0.150095958541325, 0., 0., 0.0561315001020321, 0.162226854359278, 0., 0.,  
0.106902678570771, 0.0962178900520295 ],  
[ 0., 0., 0.00564274759234631, 0.133547519465280, 0., 0., 0.00883157459666614,  
0.164963753560270, 0., 0., 0.0167816829029241, 0.183716296556840, 0., 0.,  
0.0407088331133599, 0.138788016473810 ],  
[ 0., 0., 0.00436383277538970, 0.130131922711617, 0., 0., 0.00620810254055995,  
0.146109957723185, 0., 0., 0.0115566866450722, 0.159410180779221, 0., 0.,  
0.0357086583048348, 0.153393653964935 ],  
[ 0., 0., 0., 0.146852590908143, 0., 0., 0., 0.142596540069292, 0., 0., 0.,  
0.144905002273857, 0., 0., 0., 0.177616370712209 ],  
[ 0., 0., 0., 0.164129820019951, 0., 0., 0., 0.131138006942198, 0., 0., 0.,  
0.118001851382288, 0., 0., 0., 0.184256565402224 ],  
[ 0., 0., 0., 0.199180272724569, 0., 0., 0., 0.124588148805196, 0., 0., 0.,  
0.0943745042271404, 0., 0., 0., 0.187738897061450 ],



[ 0., 0., 0., 0., 0., 0., 0., 0., 0., 0., 0., 0., 0., 0., 0., 0. ]]

*PAM;*

|                    |                    |                    |                     |
|--------------------|--------------------|--------------------|---------------------|
| 0.0588235294117647 | 0.                 | 0.                 | 0.                  |
| 0.117647058823529  | 0.                 | 0.                 | 0.                  |
| 0.117647058823529  | 0.                 | 0.                 | 0.                  |
| 0.352941176470588  | 0.0196078431372549 | 0.                 | 0.                  |
| 0.235294117647059  | 0.0784313725490196 | 0.                 | 0.                  |
| 0.0588235294117647 | 0.235294117647059  | 0.                 | 0.                  |
| 0.0588235294117647 | 0.235294117647059  | 0.0111111111111111 | 0.                  |
| 0.                 | 0.156862745098039  | 0.0444444444444444 | 0.                  |
| 0.                 | 0.156862745098039  | 0.0666666666666667 | 0.                  |
| 0.                 | 0.0784313725490196 | 0.1555555555555556 | 0.                  |
| 0.                 | 0.0196078431372549 | 0.2000000000000000 | 0.                  |
| 0.                 | 0.                 | 0.1555555555555556 | 0.                  |
| 0.                 | 0.0196078431372549 | 0.1333333333333333 | 0.00917431192660551 |
| 0.                 | 0.                 | 0.1222222222222222 | 0.0825688073394495  |
| 0.                 | 0.                 | 0.0555555555555556 | 0.100917431192661   |
| 0.                 | 0.                 | 0.0333333333333333 | 0.229357798165138   |
| 0.                 | 0.                 | 0.0222222222222222 | 0.192660550458716   |
| 0.                 | 0.                 | 0.                 | 0.110091743119266   |
| 0.                 | 0.                 | 0.                 | 0.174311926605505   |
| 0.                 | 0.                 | 0.                 | 0.0917431192660551  |
| 0.                 | 0.                 | 0.                 | 0.00917431192660551 |

(57)

*PM18A;*

[ [ 0.957173944502116, 0.0427006075755592, 0.000113389238334873, 0.0000120586839894115 (58) ],  
],  
[ 0.920747744640655, 0.0787554245398690, 0.000437521445368377,  
0.0000593093741078935 ],  
[ 0.863523683105182, 0.134730911695534, 0.00148827365444958, 0.000257131544834793  
],  
[ 0.782672169865799, 0.211929401143168, 0.00442429323778030, 0.000974135753252700  
],  
[ 0.680934866704034, 0.304444556543718, 0.0114172751359749, 0.00320330161627252 ],  
[ 0.567072724528923, 0.398302265410621, 0.0255067818175006, 0.00911822824295642 ],  
[ 0.452754314487718, 0.475328927683661, 0.0494121655939684, 0.0225045922346526 ],

[ 0.348241934085769, 0.519950355726778, 0.0834114105335639, 0.0483962996538892 ],  
[ 0.259922212109426, 0.525132899582885, 0.123594954888809, 0.0913499334188798 ],  
[ 0.190147537160836, 0.494607534355741, 0.162374709142333, 0.152870219341090 ],  
[ 0.138170773626112, 0.440282937502296, 0.191683740745619, 0.229862548125974 ],  
[ 0.101345703718025, 0.376417092516212, 0.206631497813384, 0.315605705952379 ],  
[ 0.0763148139483294, 0.314357641730448, 0.206875090039206, 0.402452454282017 ],  
[ 0.0599291678465495, 0.260499298015845, 0.195403759045380, 0.484167775092226 ],  
[ 0.0497285059620921, 0.217033549821997, 0.176432785389121, 0.556805158826790 ],  
[ 0.0440519841374863, 0.183669536600564, 0.153849096681343, 0.618429382580607 ],  
[ 0.0419762863263599, 0.159081227729292, 0.130543075890764, 0.668399410053584 ],  
[ 0.0432507097683317, 0.141755384949944, 0.108345935525996, 0.706647969755728 ],  
[ 0.0483391621905514, 0.130364443952333, 0.0882303632116926, 0.733066030645424 ],  
[ 0.0586621462645900, 0.123853222423906, 0.0705641198705281, 0.746920511440976 ],  
[ 0.0771658896565804, 0.121347878176189, 0.0553274090794568, 0.746158823087774 ]]

*add(PAM118M2[i, 1], i = 1 ..NA); PAM;*

1.00000000000000

|                    |                    |                    |                     |
|--------------------|--------------------|--------------------|---------------------|
| 0.0588235294117647 | 0.                 | 0.                 | 0.                  |
| 0.117647058823529  | 0.                 | 0.                 | 0.                  |
| 0.117647058823529  | 0.                 | 0.                 | 0.                  |
| 0.352941176470588  | 0.0196078431372549 | 0.                 | 0.                  |
| 0.235294117647059  | 0.0784313725490196 | 0.                 | 0.                  |
| 0.0588235294117647 | 0.235294117647059  | 0.                 | 0.                  |
| 0.0588235294117647 | 0.235294117647059  | 0.0111111111111111 | 0.                  |
| 0.                 | 0.156862745098039  | 0.0444444444444444 | 0.                  |
| 0.                 | 0.156862745098039  | 0.0666666666666667 | 0.                  |
| 0.                 | 0.0784313725490196 | 0.1555555555555556 | 0.                  |
| 0.                 | 0.0196078431372549 | 0.2000000000000000 | 0.                  |
| 0.                 | 0.                 | 0.1555555555555556 | 0.                  |
| 0.                 | 0.0196078431372549 | 0.1333333333333333 | 0.00917431192660551 |
| 0.                 | 0.                 | 0.1222222222222222 | 0.0825688073394495  |
| 0.                 | 0.                 | 0.0555555555555556 | 0.100917431192661   |
| 0.                 | 0.                 | 0.0333333333333333 | 0.229357798165138   |
| 0.                 | 0.                 | 0.0222222222222222 | 0.192660550458716   |
| 0.                 | 0.                 | 0.                 | 0.110091743119266   |
| 0.                 | 0.                 | 0.                 | 0.174311926605505   |
| 0.                 | 0.                 | 0.                 | 0.0917431192660551  |
| 0.                 | 0.                 | 0.                 | 0.00917431192660551 |

(59)

**for ny1 from 1 to NM18 do**  
**for ny2 from 1 to NM2 do**

*add(PAM118M2[i, NM2·(ny1 - 1) + ny2], i = 1 ..NA);*

**end do;**  
**end do;**

*ny1 := 1*  
*ny2 := 1*  
1.0000000000000000  
*ny2 := 2*  
1.0000000000000000  
*ny2 := 3*  
1.0000000000000000

$ny2 := 4$   
1.  
 $ny2 := 5$   
 $ny1 := 2$   
 $ny2 := 1$   
1.0000000000000000  
 $ny2 := 2$   
1.  
 $ny2 := 3$   
1.0000000000000000  
 $ny2 := 4$   
1.  
 $ny2 := 5$   
 $ny1 := 3$   
 $ny2 := 1$   
1.  
 $ny2 := 2$   
1.  
 $ny2 := 3$   
1.  
 $ny2 := 4$   
1.0000000000000000  
 $ny2 := 5$   
 $ny1 := 4$   
 $ny2 := 1$   
1.  
 $ny2 := 2$   
1.  
 $ny2 := 3$   
1.0000000000000000  
 $ny2 := 4$   
1.  
 $ny2 := 5$   
 $ny1 := 5$

**for ny1 from 1 to NM18 do**  
**for ny2 from 1 to NM2 do**

*#dataplot(AgeGraph, [PAM[ ..., ny2], PAM18[ny1,..], PAM118M2[ ..., NM2·(ny1 - 1) + ny2]], caption = typeset("Output P(A | M18=", ny1, ", M2=", ny2, ")"));*

*#dataplot(AgeGraph, [PMA[ ..., ny2], PM18A[ ..., ny1], PAM118M2[ ..., NM2·(ny1 - 1) + ny2]], caption = typeset("Output P( M2=", ny2, " | A ); P(M18=", ny1, ", | A ); P(A | M18=", ny1, ", M2=", ny2, ")"));*

*# dataplot(AgeGraph, [PMA[ ..., ny2], PM18A[ ..., ny1], PAM118M2[ ..., NM2·(ny1 - 1) + ny2]], linestyle = [dot, dash, dashdot, solid], color = "black", legend = [typeset("P( M2=", ny2, " | A )"), typeset("P(M1=", ny1, ", | A );"), typeset("P(A | M18=", ny1, ", M2=", ny2, ")")]);*

**end do;**  
**end do;**

*ny1 := 1*

*ny2 := 1*

*ny2 := 2*

*ny2 := 3*

*ny2 := 4*

*ny2 := 5*

*ny1 := 2*

*ny2 := 1*

*ny2 := 2*

*ny2 := 3*

*ny2 := 4*

*ny2 := 5*

*ny1 := 3*

*ny2 := 1*

*ny2 := 2*

*ny2 := 3*

*ny2 := 4*

*ny2 := 5*

*ny1 := 4*

*ny2 := 1*

*ny2 := 2*

*ny2 := 3*

```

ny2 := 4
ny2 := 5
ny1 := 5

```

**(61)**

```

M18Lab := Array( ["A", "B", "C", "D"], datatype = string);
M18Lab := [ "A" "B" "C" "D" ]

```

**(62)**

```

M18Lab[3];

```

**"C"** **(63)**

```

M2Lab := Array( ["S1", "S2", "S3", "S4"], datatype = string);
M2Lab := [ "S1" "S2" "S3" "S4" ]

```

**(64)**

```

M2Lab[3];

```

**"S3"** **(65)**

```

for ny1 from 1 to NM18 do
  for ny2 from 1 to NM2 do

```

```

    dataplot(AgeGraph, [PAM18[ny1,..], PMA[ .., ny2], PAM118M2[ .., NM2·(ny1 - 1)
+ ny2]], linestyle = [dot, dash, solid], color = "black", legend = [typeset("P(A | M1=",
M18Lab[ny1], ") "), typeset("P(M2=", M2Lab[ny2], " | A) ")",
typeset("P(A | M1=", M18Lab[ny1], ", M2=", M2Lab[ny2], ")") ]]);

```

```

    end do;
end do;

```

```

ny1 := 1
ny2 := 1

```

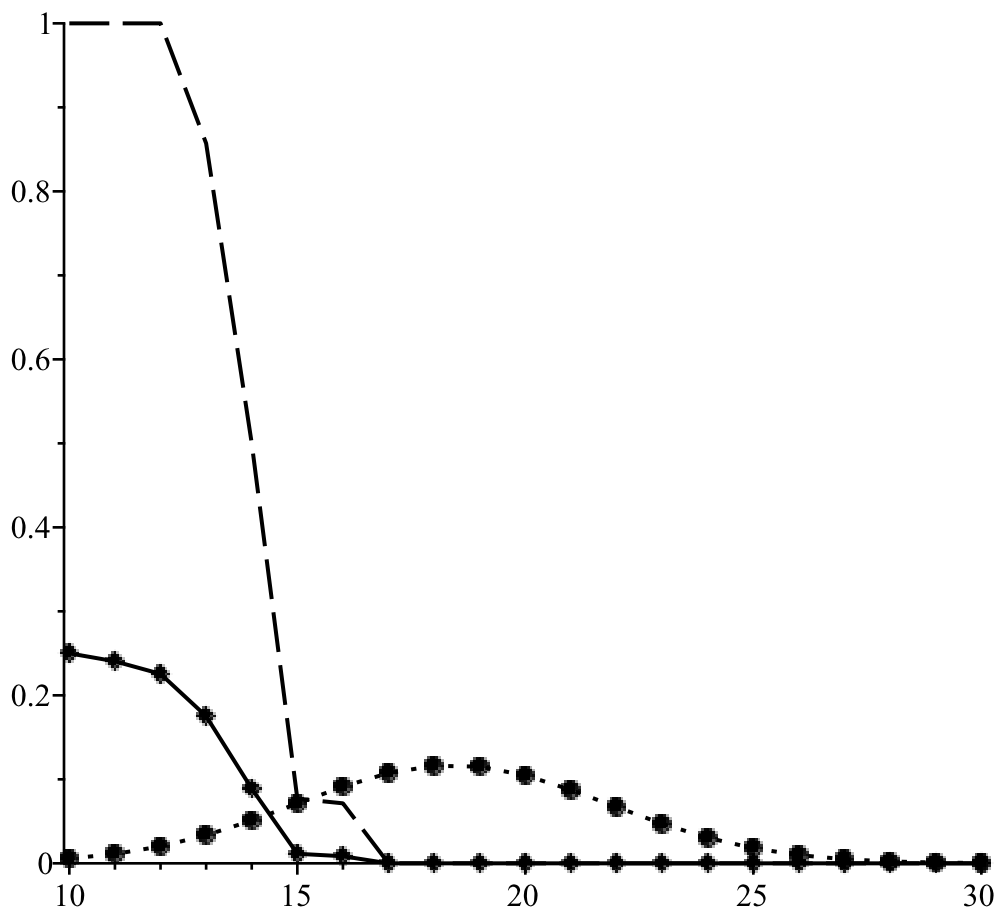

$P(A | M1=A)$ 

 $P(M2=S1 | A)$ 

 $P(A | M1=A, M2=S1)$

*ny2 := 2*

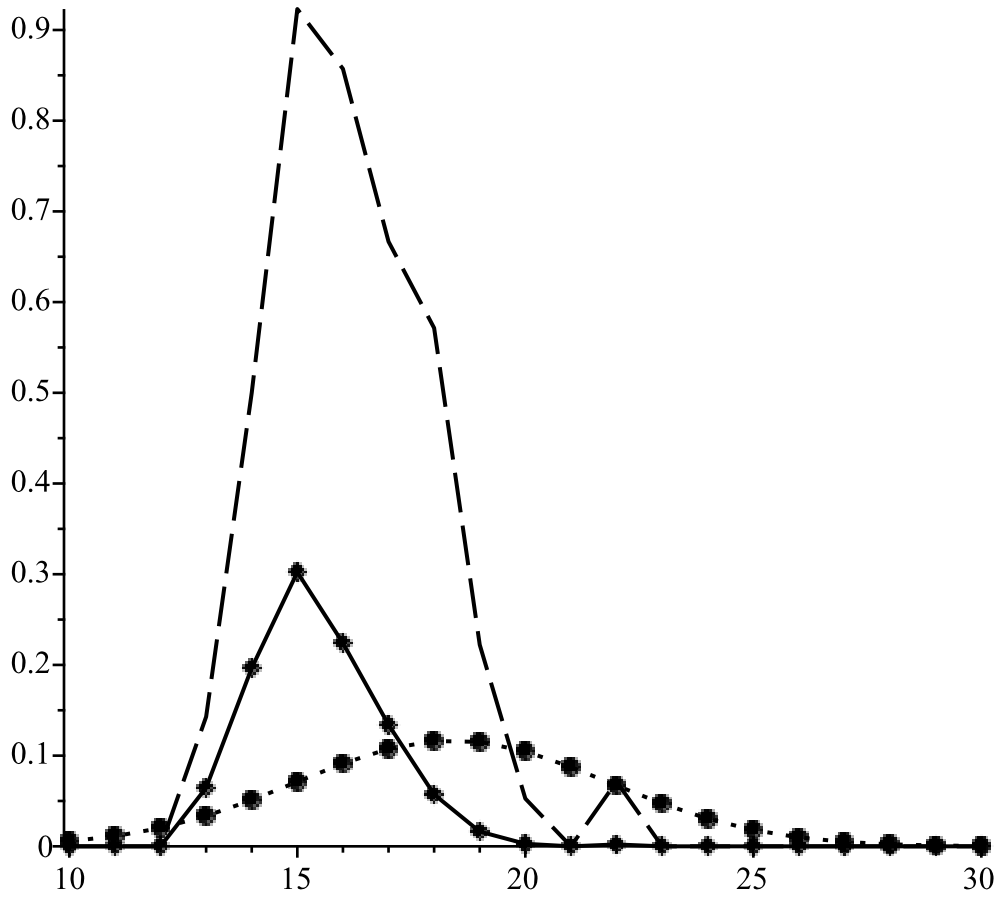

..... P(A | M1=A)    - - - P(M2=S2 | A)    ——— P(A | M1=A, M2=S2)

*ny2 := 3*



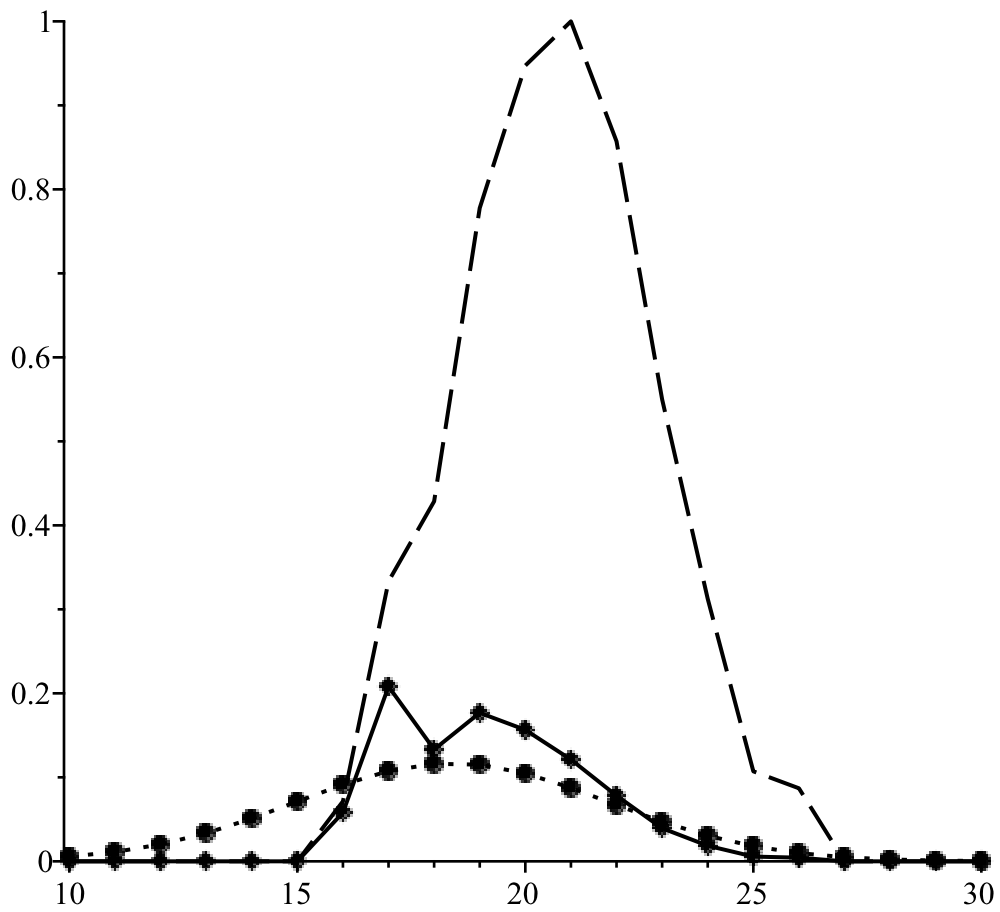

..... P(A | M1=A)    - - - P(M2=S3 | A)    ——— P(A | M1=A, M2=S3)

*ny2 := 4*

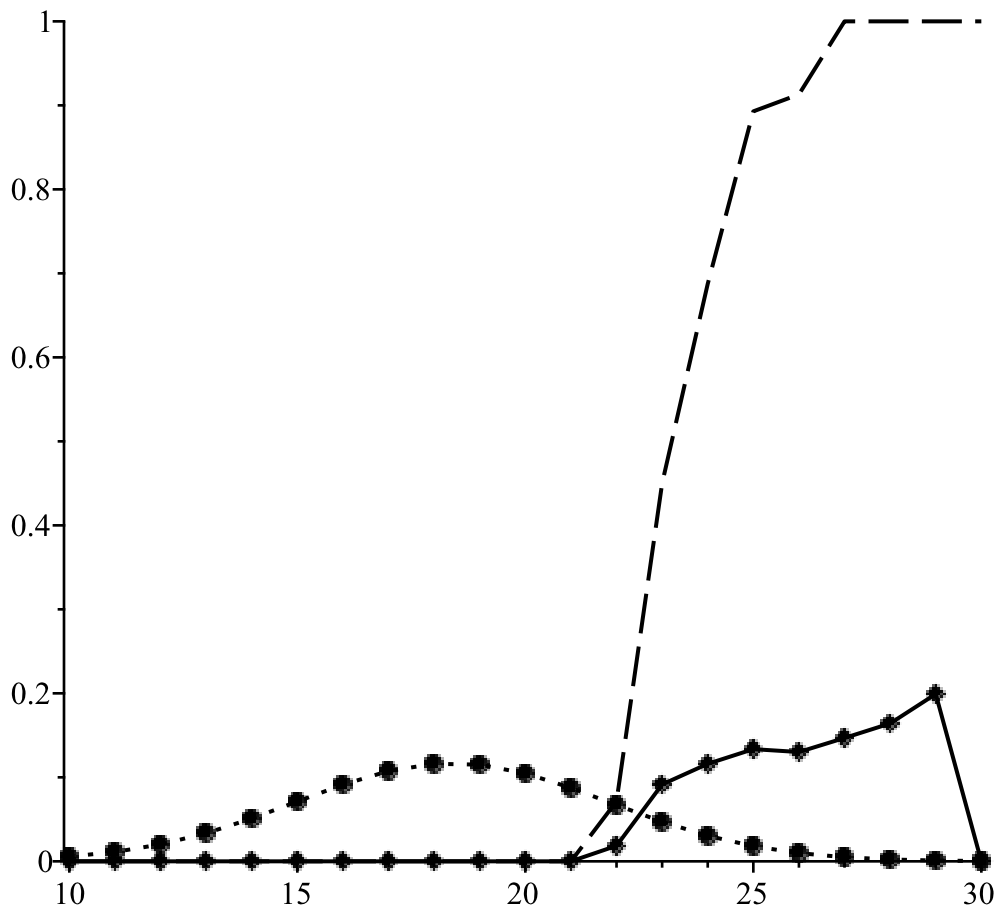

..... P(A | M1=A)    - - - P(M2=S4 | A)    ——— P(A | M1=A, M2=S4)

*ny2 := 5*  
*ny1 := 2*  
*ny2 := 1*

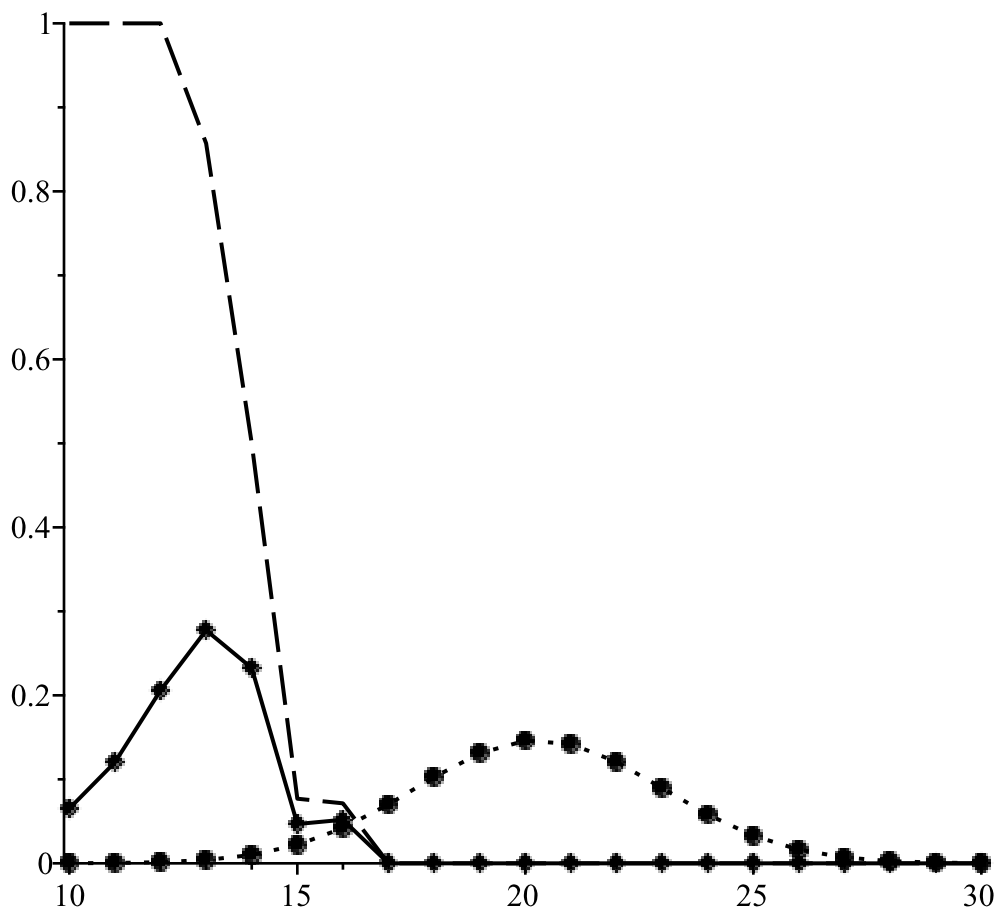

$P(A | M1=B)$ 

 $P(M2=S1 | A)$ 

 $P(A | M1=B, M2=S1)$

*ny2 := 2*

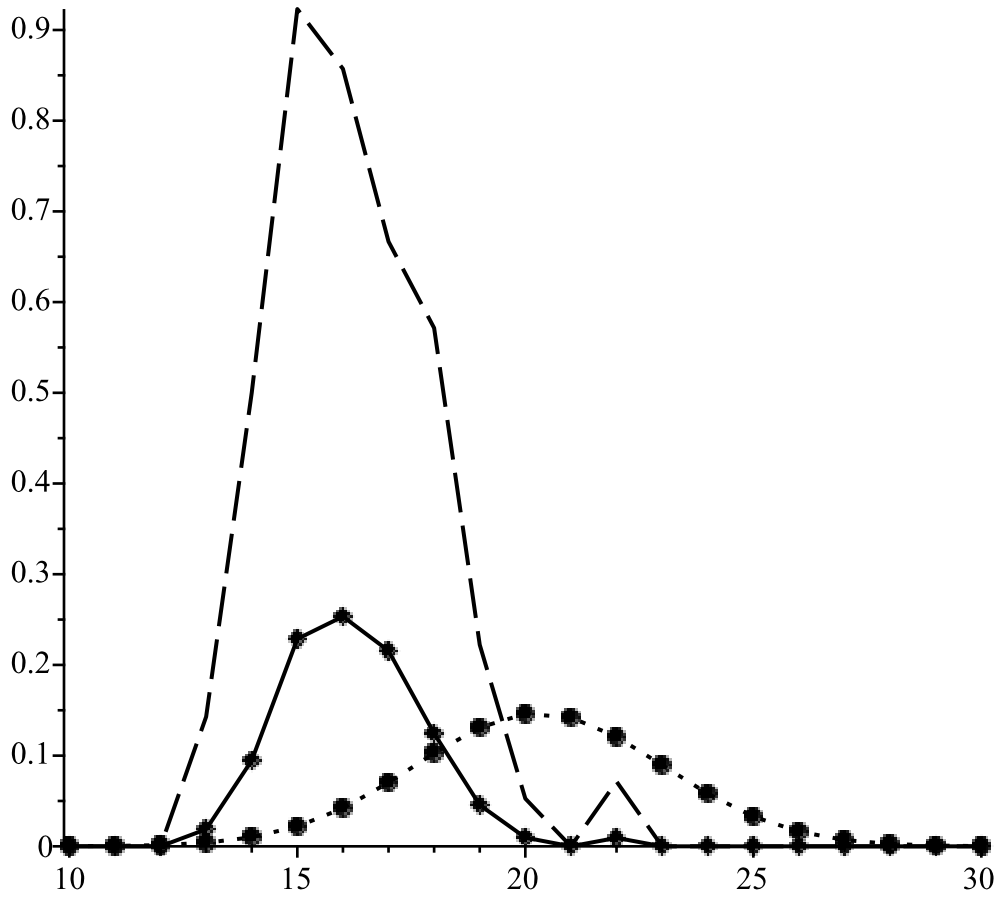

.....  $P(A | M1=B)$     - - -  $P(M2=S2 | A)$     —  $P(A | M1=B, M2=S2)$

*ny2 := 3*

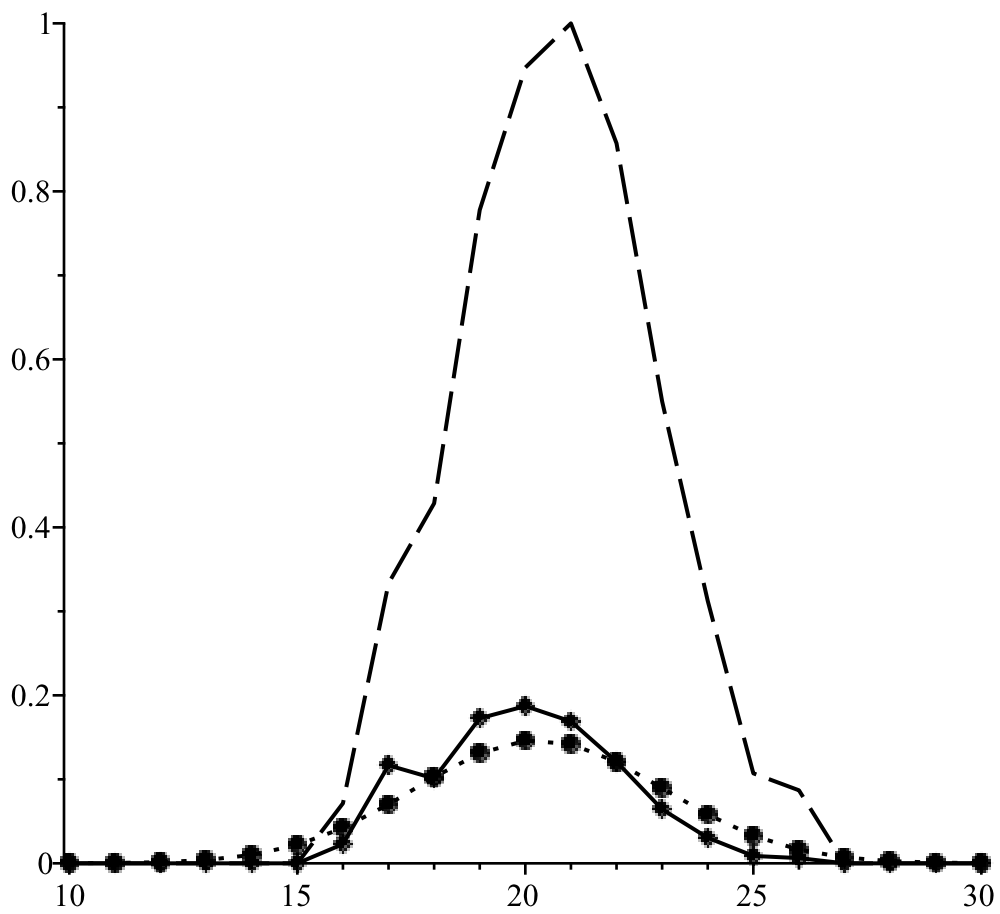

$P(A | M1=B)$ 

 $P(M2=S3 | A)$ 

 $P(A | M1=B, M2=S3)$

$ny2 := 4$

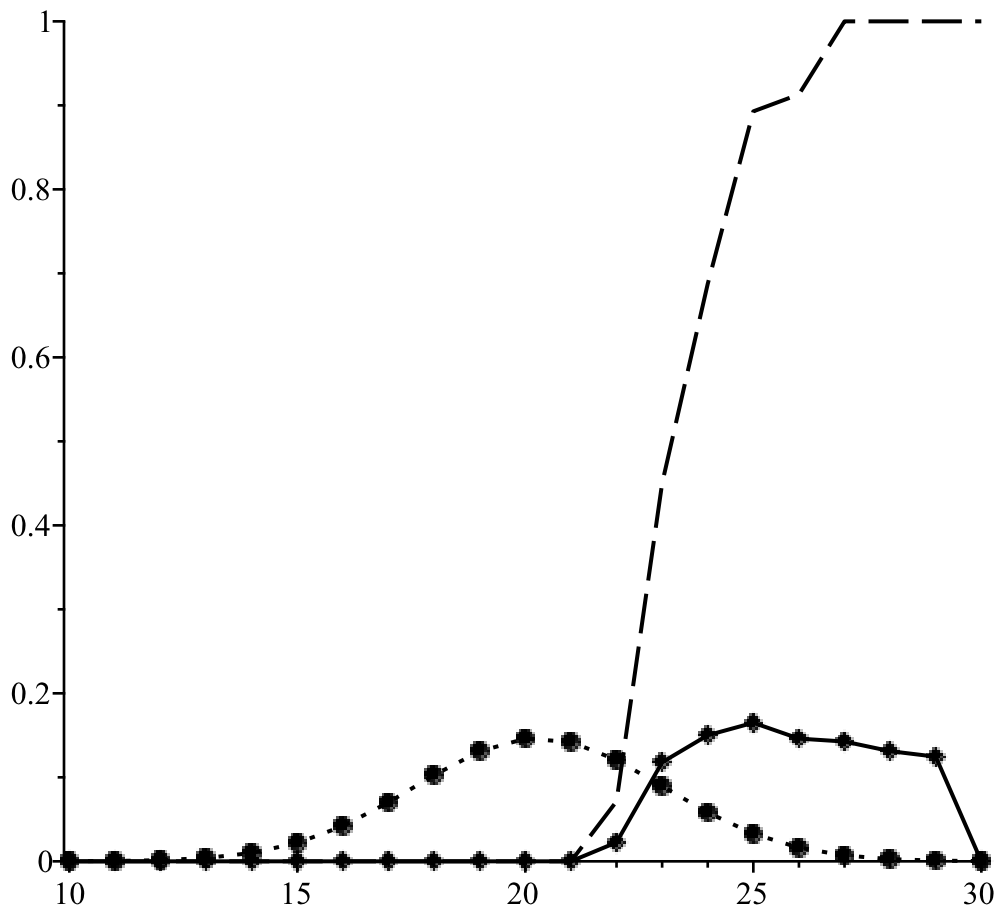

..... P(A | M1=B)    - - - P(M2=S4 | A)    ——— P(A | M1=B, M2=S4)

*ny2 := 5*  
*ny1 := 3*  
*ny2 := 1*

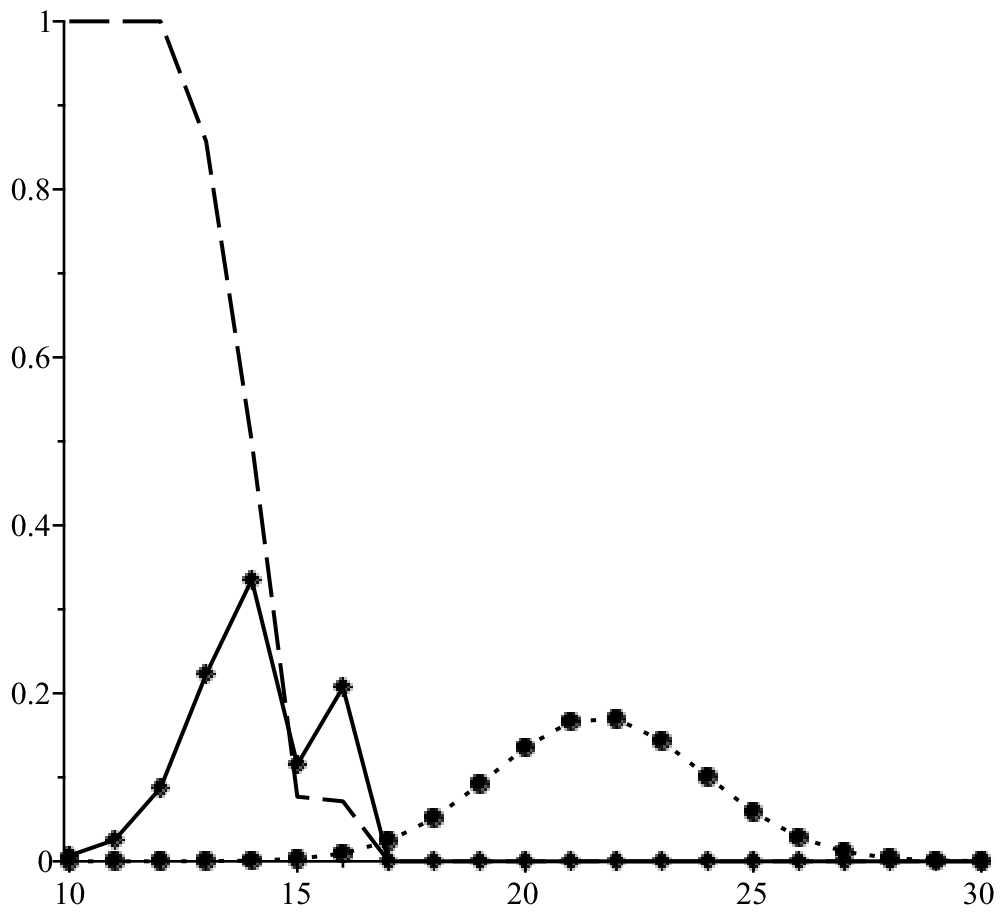

$\cdots$   $P(A | M1=C)$      $---$   $P(M2=S1 | A)$      $—$   $P(A | M1=C, M2=S1)$

$ny2 := 2$

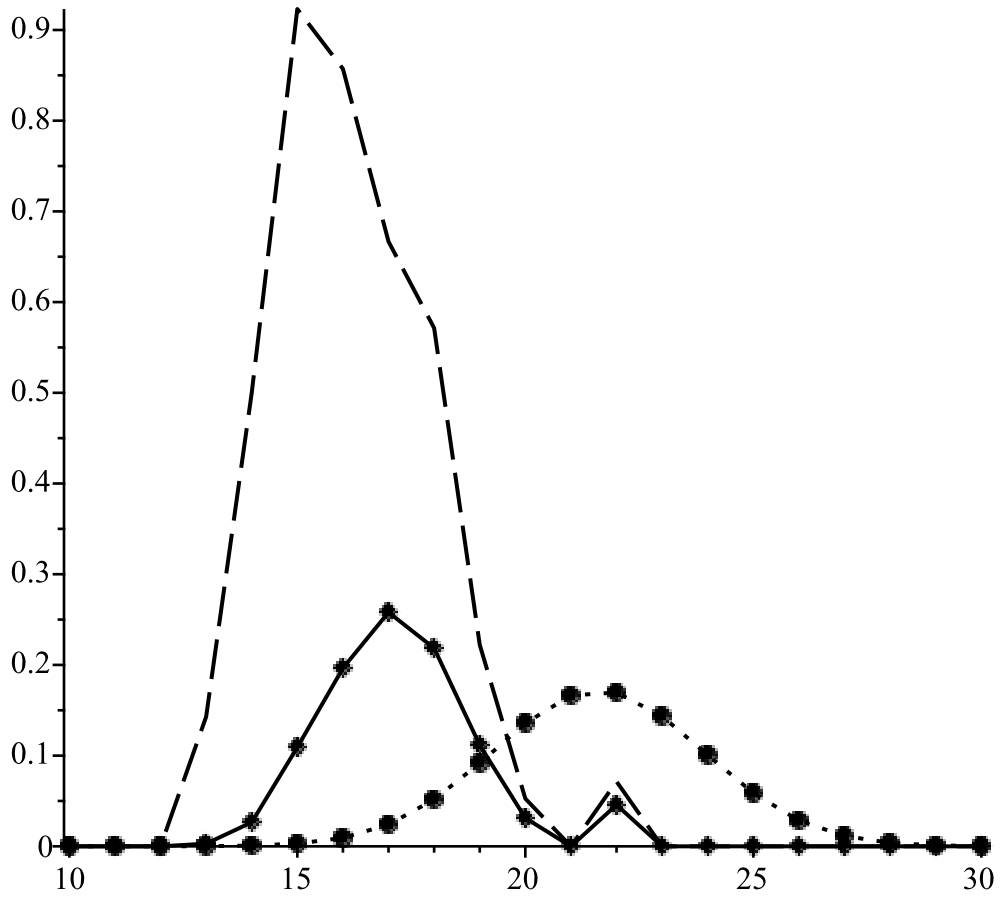

.....  $P(A | M1=C)$     - - -  $P(M2=S2 | A)$     —  $P(A | M1=C, M2=S2)$

*ny2 := 3*



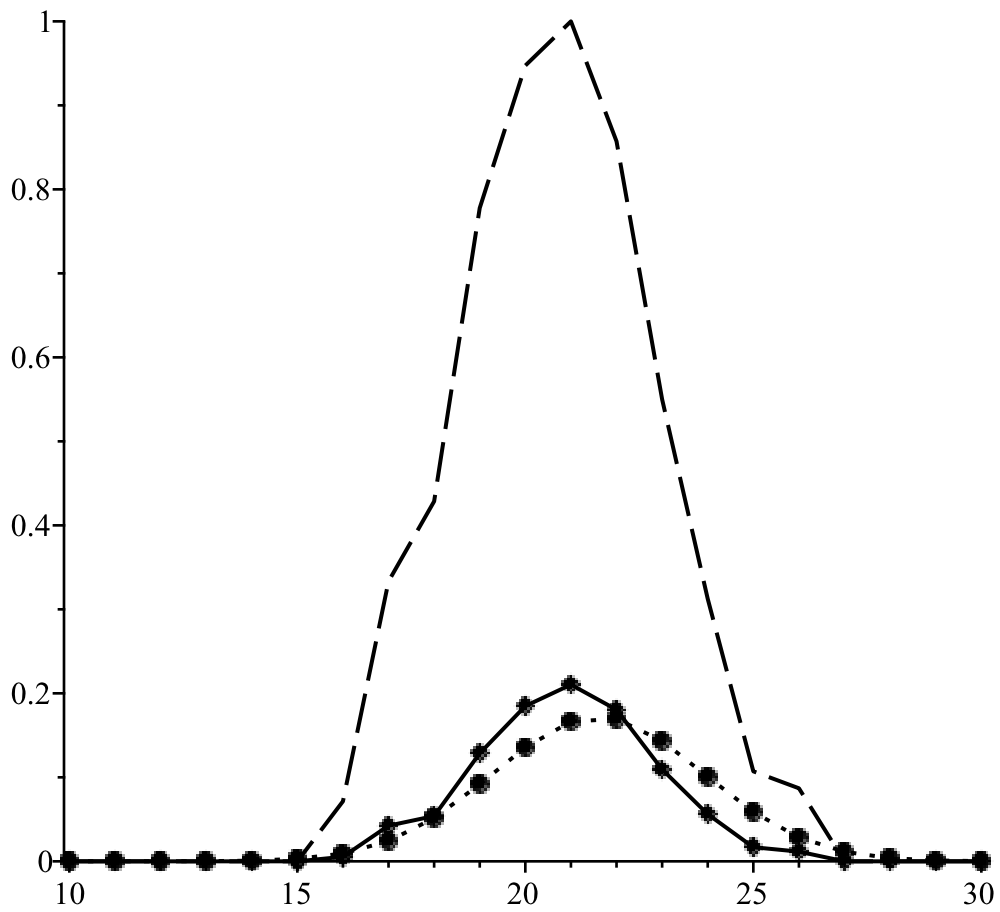

..... P(A | M1=C)    - - - P(M2=S3 | A)    ——— P(A | M1=C, M2=S3)

*ny2 := 4*

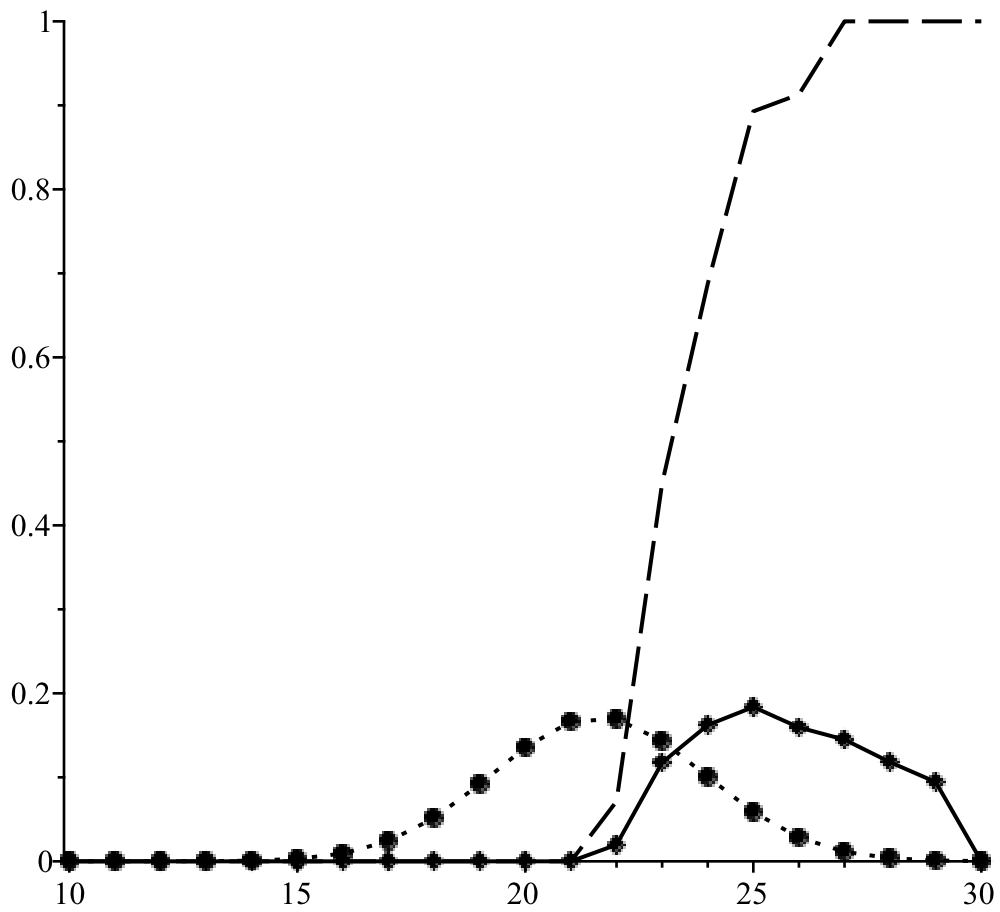

..... P(A | M1=C)    - - - P(M2=S4 | A)    ——— P(A | M1=C, M2=S4)

*ny2 := 5*

*ny1 := 4*

*ny2 := 1*

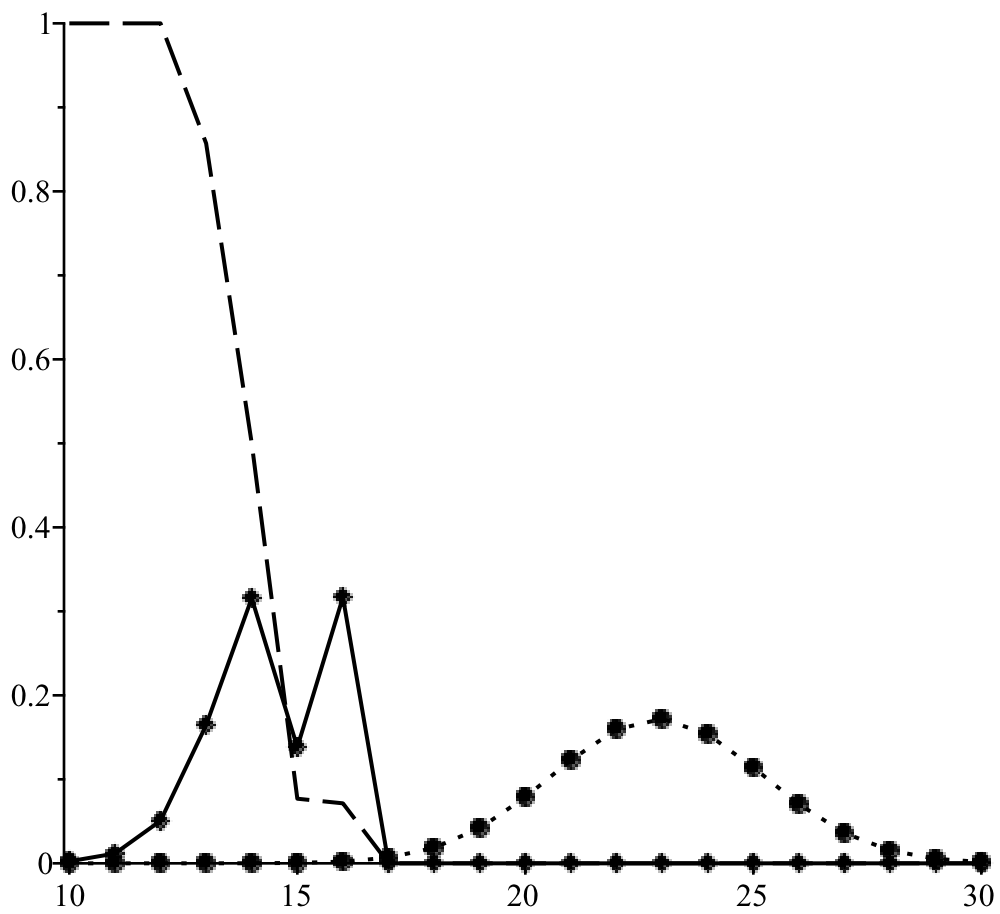

$P(A | M1=D)$ 

 $P(M2=S1 | A)$ 

 $P(A | M1=D, M2=S1)$

$ny2 := 2$

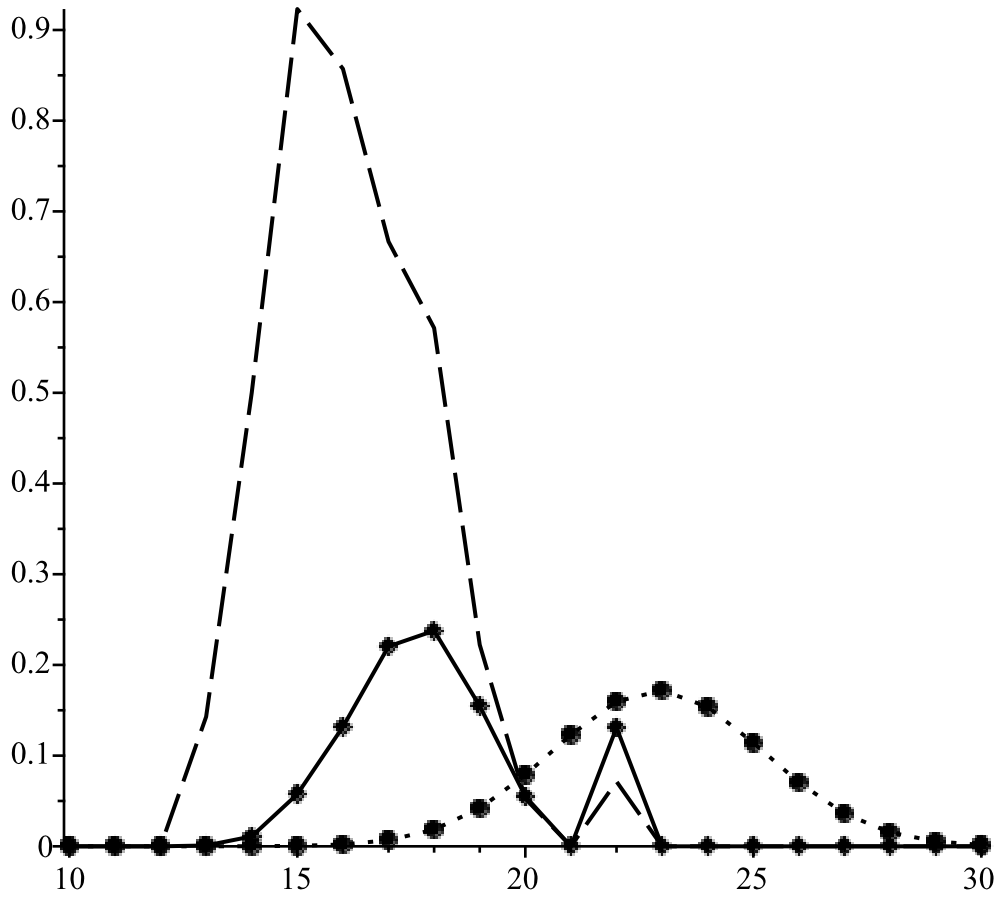

$P(A | M1=D)$ 

 $P(M2=S2 | A)$ 

 $P(A | M1=D, M2=S2)$

*ny2 := 3*

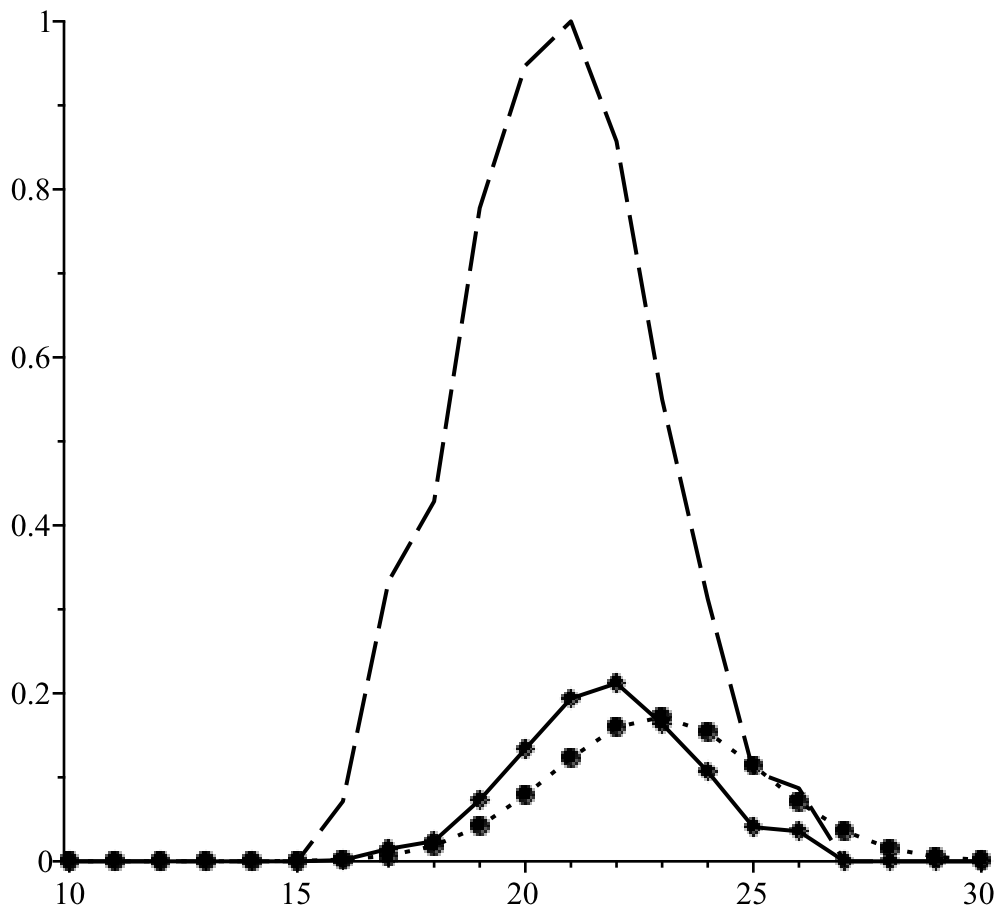

$P(A \mid M1=D)$ 

 $P(M2=S3 \mid A)$ 

 $P(A \mid M1=D, M2=S3)$

*ny2 := 4*

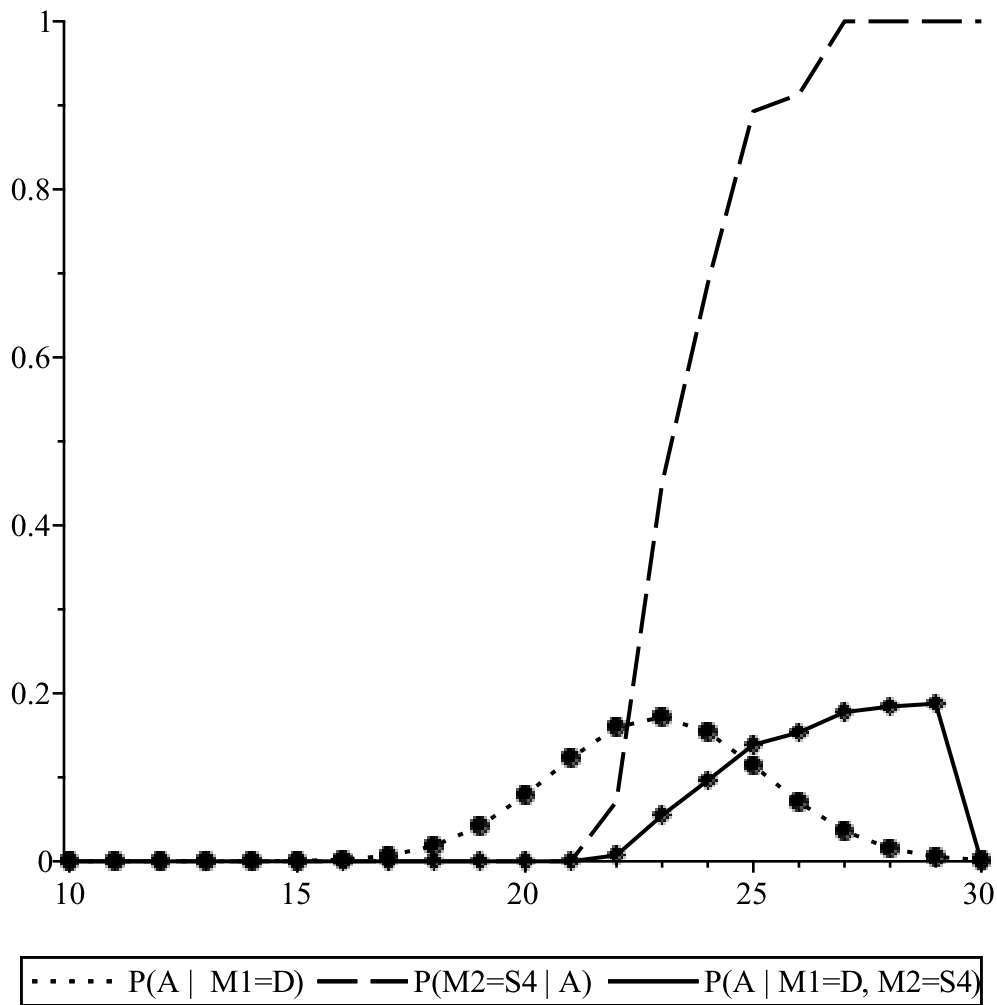

*ny2 := 5*

*ny1 := 5*

(66)

**for ny1 from 1 to NM18 do**  
**for ny2 from 1 to NM2 do**

```

# dataplot(10 .. 30, [PAM[ ..., ny2], PAM18[ny1,..], PAM118M2[ ..., NM2·(ny1 - 1)
+ ny2]], linestyle= [dot, dashdot, solid], color= "black")
dataplot(AgeGraph, [PAM18[ny1,..], PAM[ ..., ny2], PAM118M2[ ..., NM2·(ny1 - 1)
+ ny2]], linestyle= [dot, dash, solid], color= "black", legend= [typeset("P(A | M1=",
M18Lab[ny1], ")"), typeset("P(A | M2=", M2Lab[ny2], ")"), typeset("P(A | M1=", M18Lab[ny1],
", M2=", M2Lab[ny2], ")")]);

```

**end do;**  
**end do;**

*ny1 := 1*

(67)

*ny2 := 1*

(67)

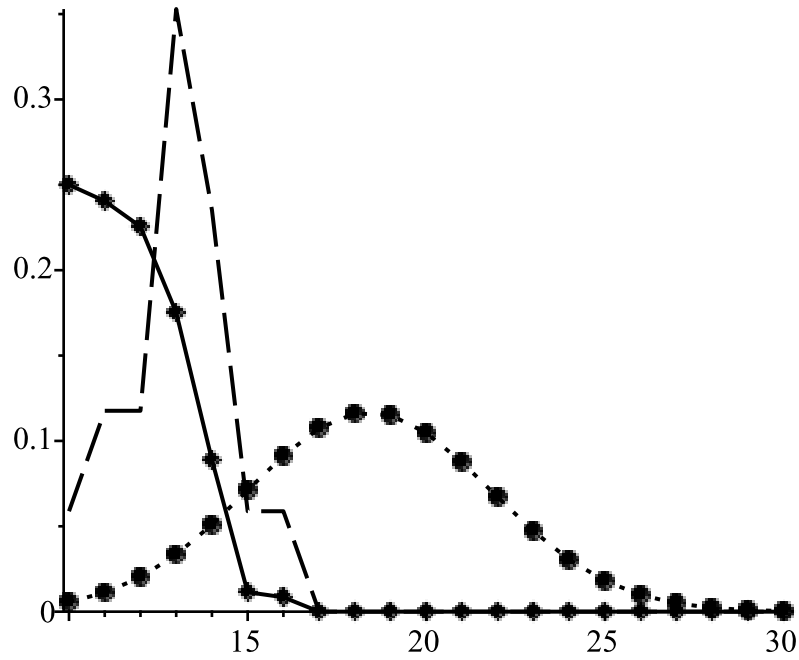

(67)

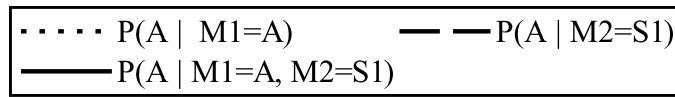

$ny2 := 2$

(67)

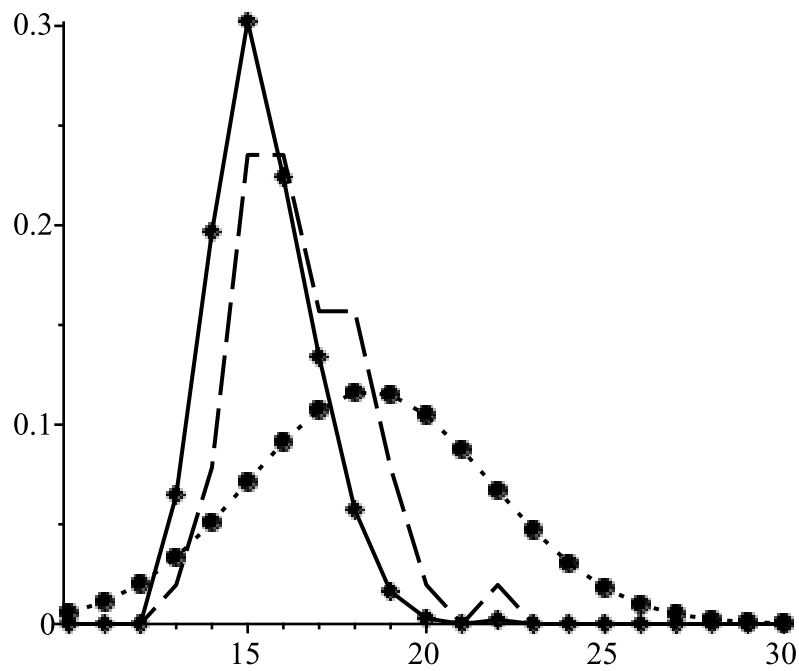

(67)

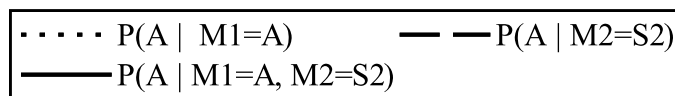

$ny2 := 3$

(67)

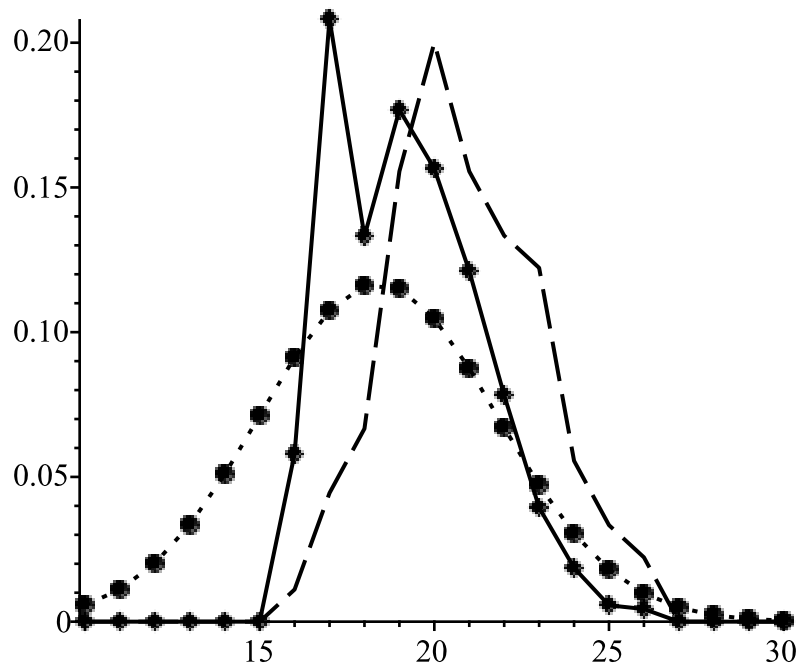

(67)

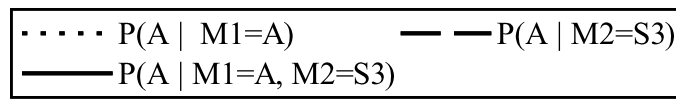

*ny2 := 4*

(67)

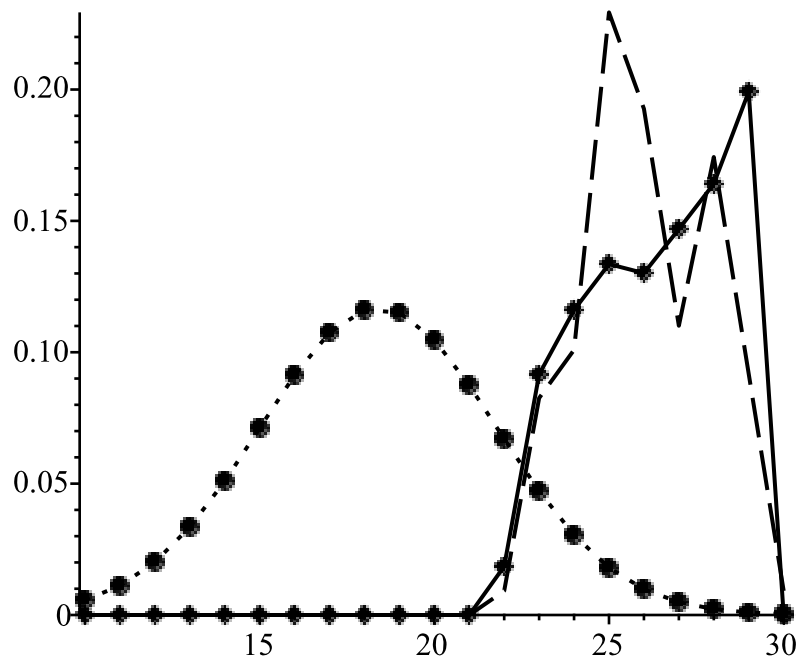

(67)

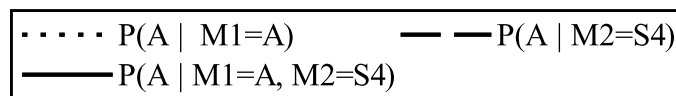

*ny2 := 5*

(67)

*ny1 := 2*

(67)

*ny2 := 1*

(67)



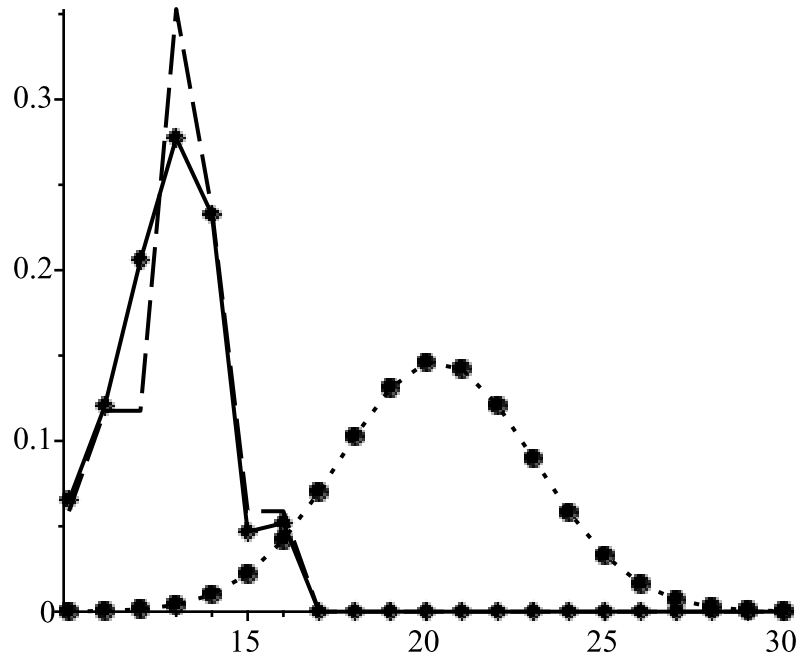

(67)

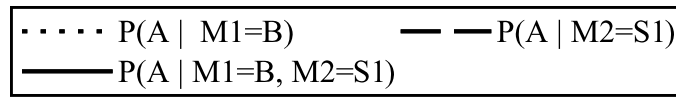

$ny2 := 2$

(67)

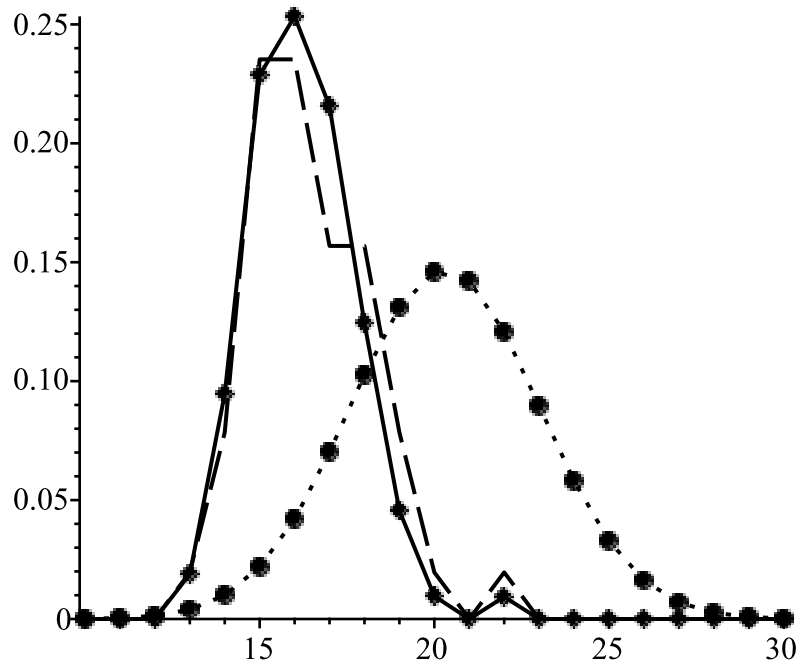

(67)

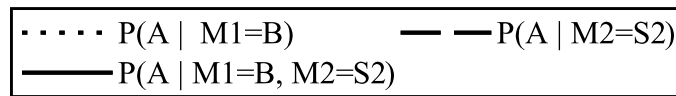

$ny2 := 3$

(67)

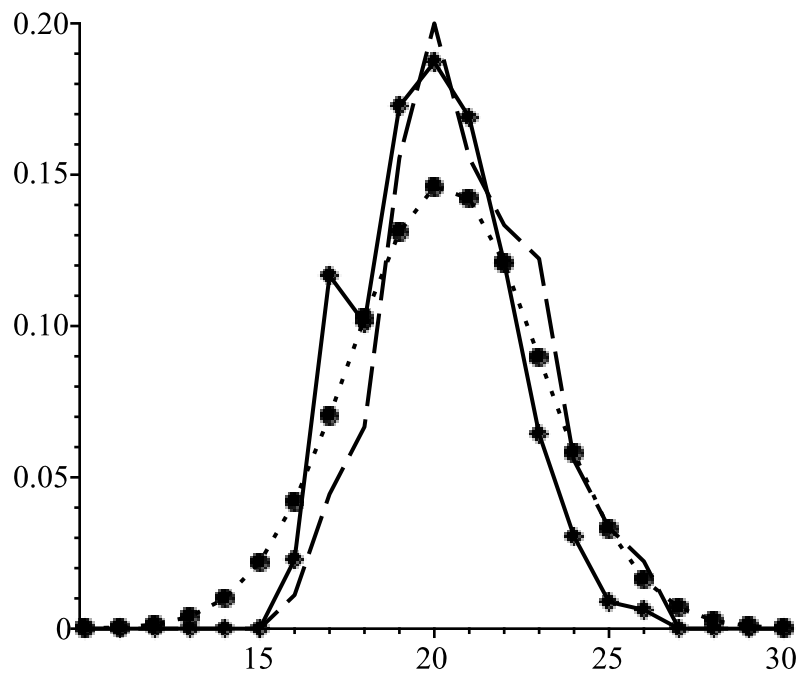

(67)

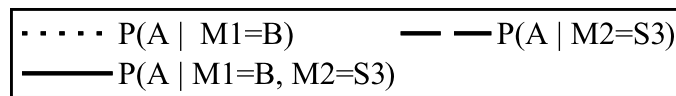

$ny2 := 4$

(67)

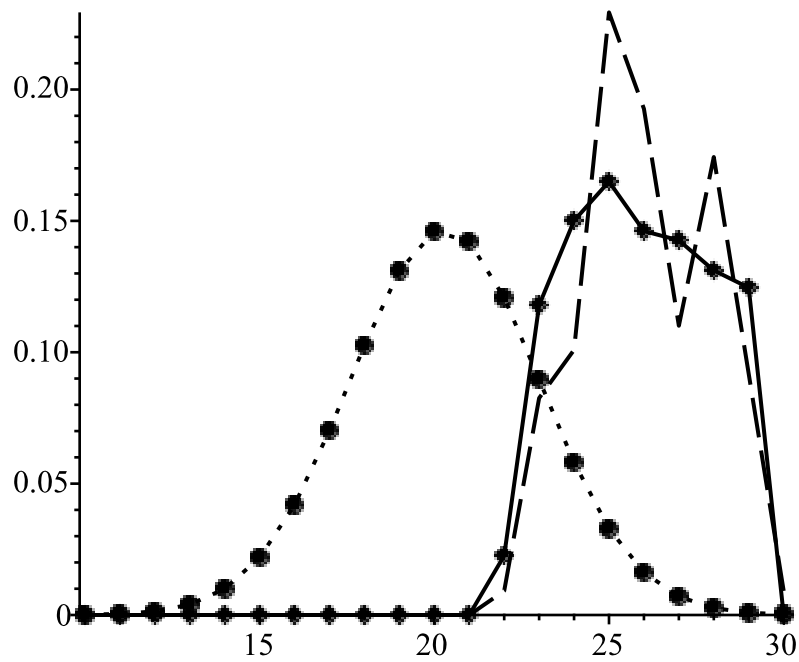

(67)

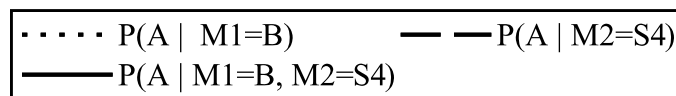

$ny2 := 5$

(67)

$ny1 := 3$

(67)

$ny2 := 1$

(67)

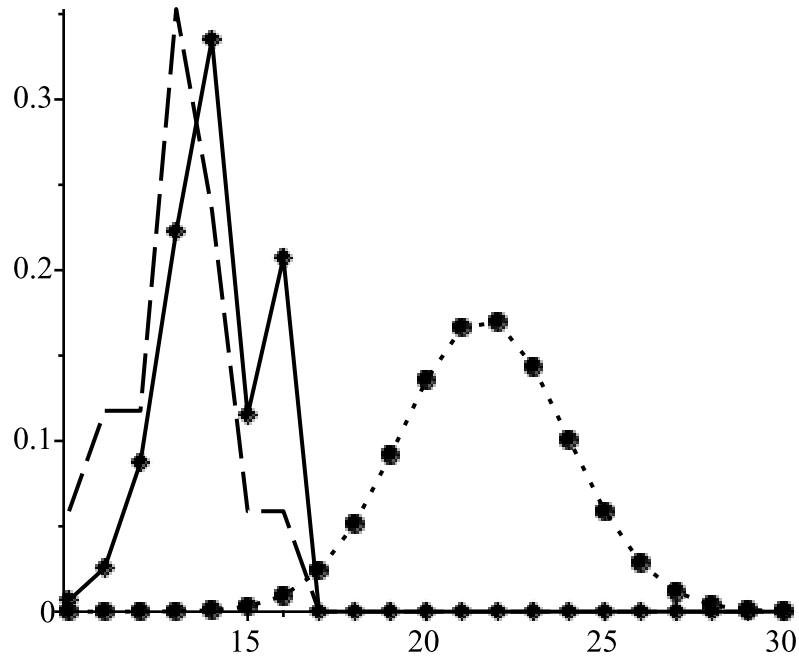

(67)

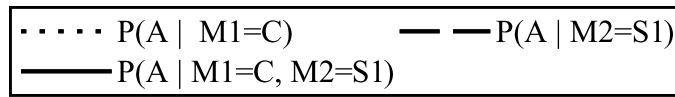

$ny2 := 2$

(67)

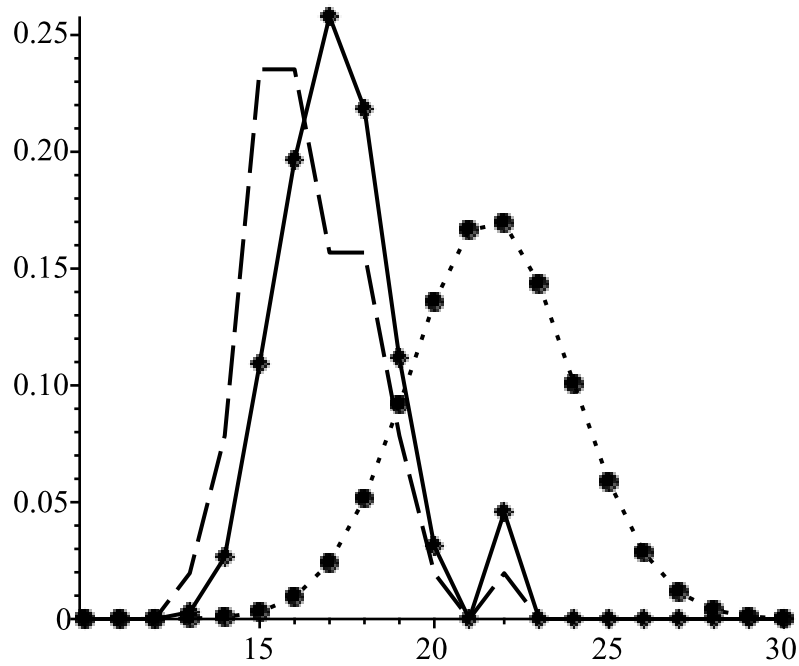

(67)

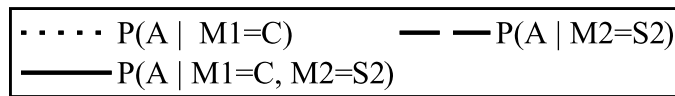

$ny2 := 3$

(67)

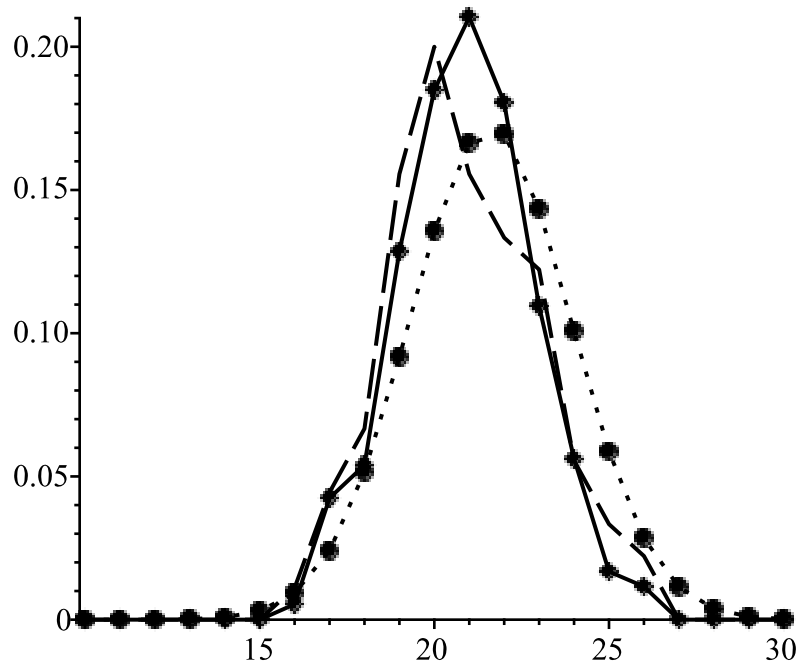

(67)

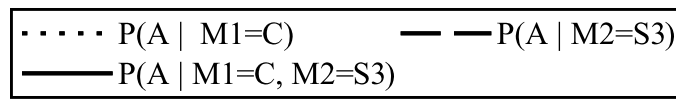

$ny2 := 4$

(67)

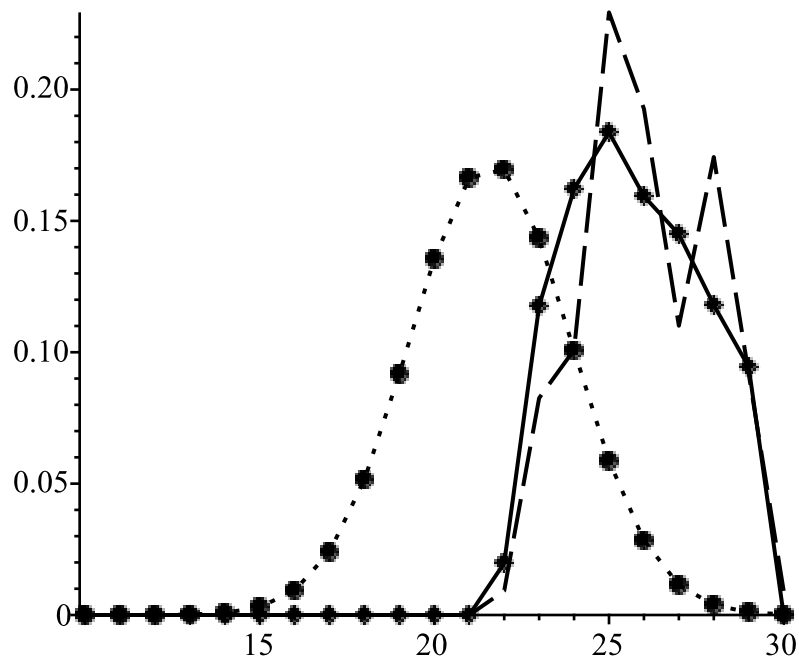

(67)

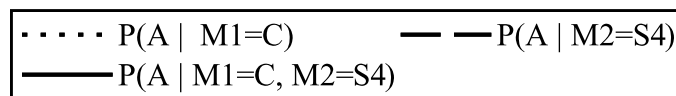

$ny2 := 5$

(67)

$ny1 := 4$

(67)

$ny2 := 1$

(67)

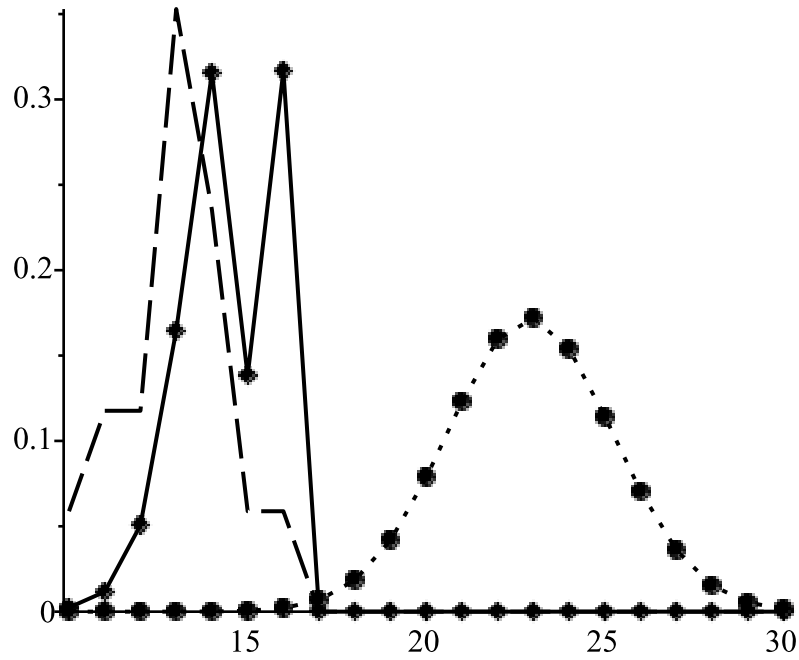

(67)

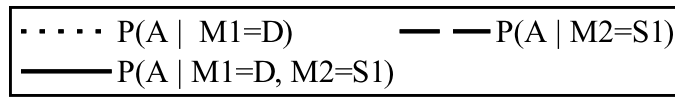

$ny2 := 2$

(67)

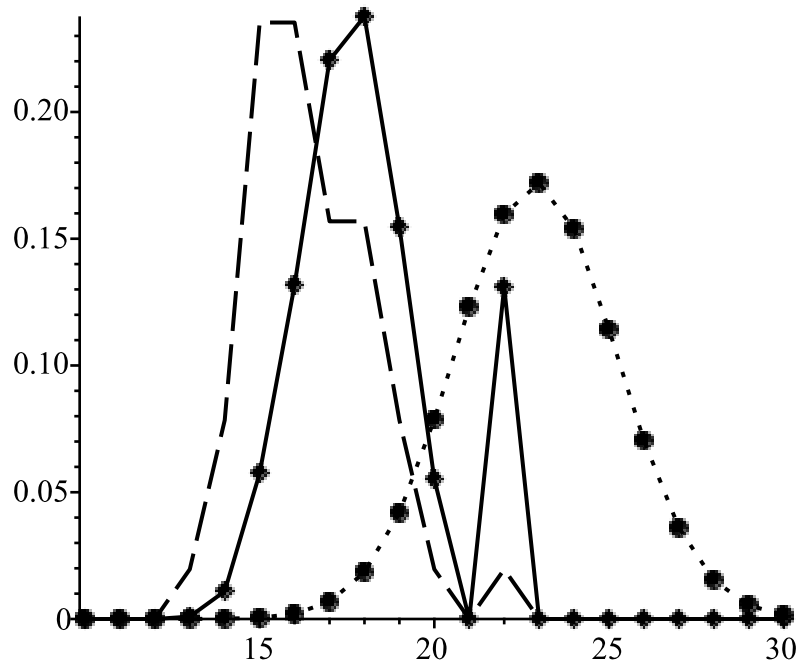

(67)

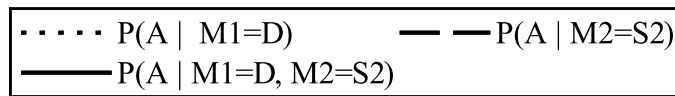

$ny2 := 3$

(67)

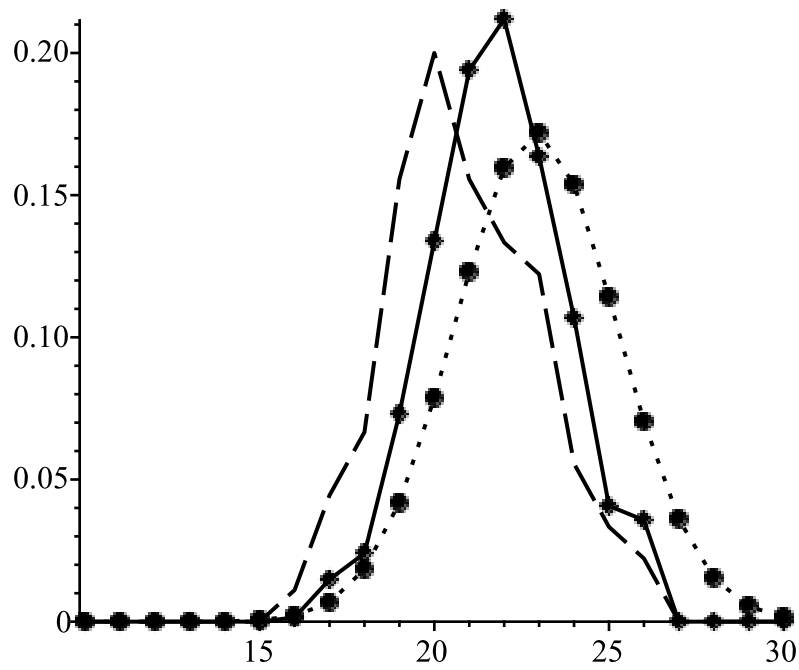

(67)

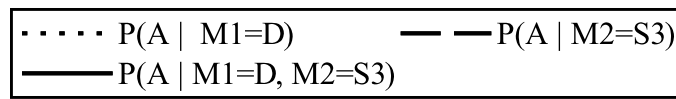

$ny2 := 4$

(67)

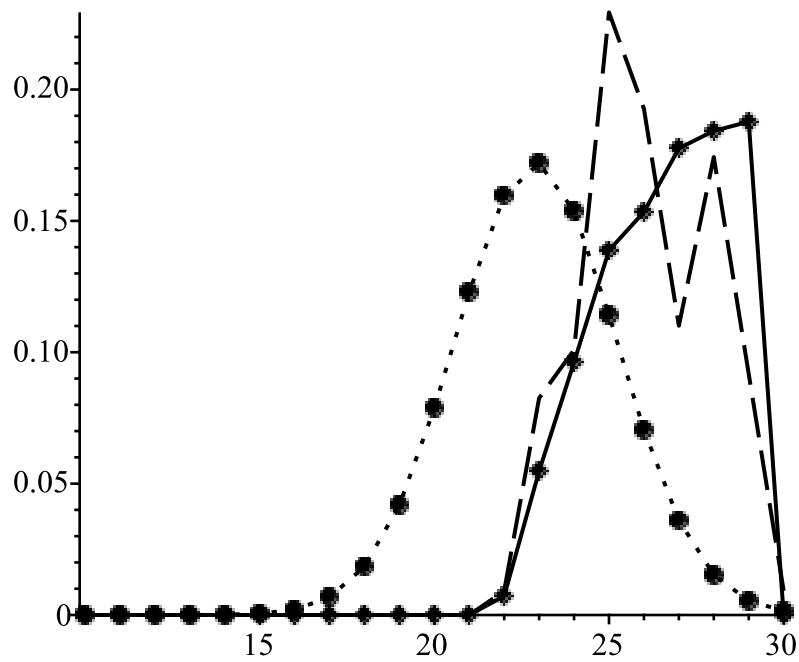

(67)

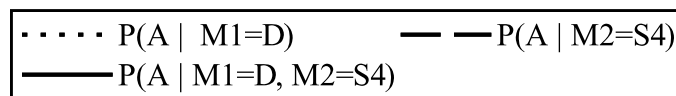

$ny2 := 5$

(67)

$ny1 := 5$

(67)

*for ny1 from 1 to NM18 do*

**for ny2 from 1 to NM2 do**

```
    dataplot(AgeGraph, [PM18A[ .., ny1], PMA[ .., ny2], PAM118M2[ .., NM2·(ny1 - 1)
+ ny2]], linestyle= [dot, dash, solid], color= "black", legend= [typeset("P(M1=", M18Lab[ny1],
" | A)"), typeset("P(M2=", M2Lab[ny2], " | A)"), typeset("P(A | M1=", M18Lab[ny1], ", M2=",
M2Lab[ny2], ")")]);
```

**end do;**  
**end do;**

*ny1 := 1*

*ny2 := 1*

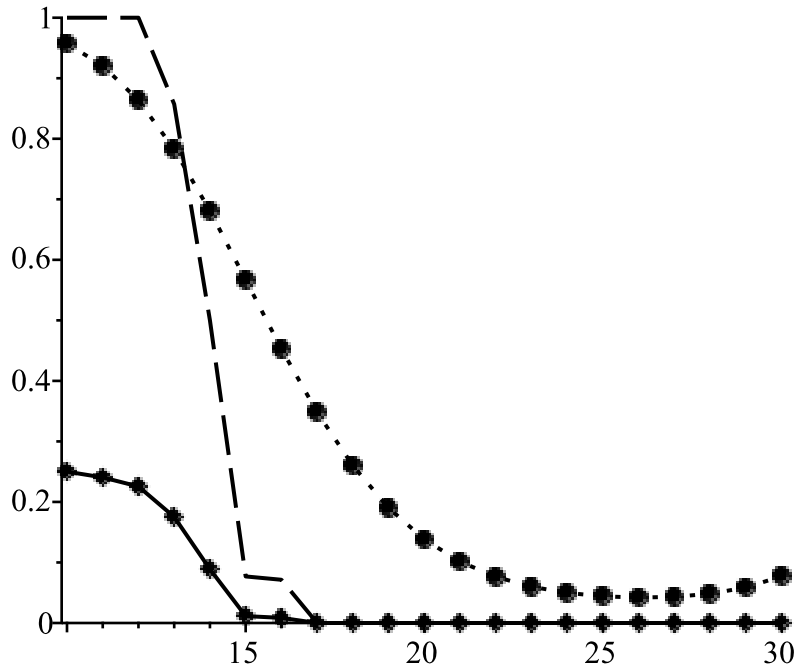

|                         |                    |
|-------------------------|--------------------|
| ..... P(M1=A   A)       | ----- P(M2=S1   A) |
| ———— P(A   M1=A, M2=S1) |                    |

*ny2 := 2*

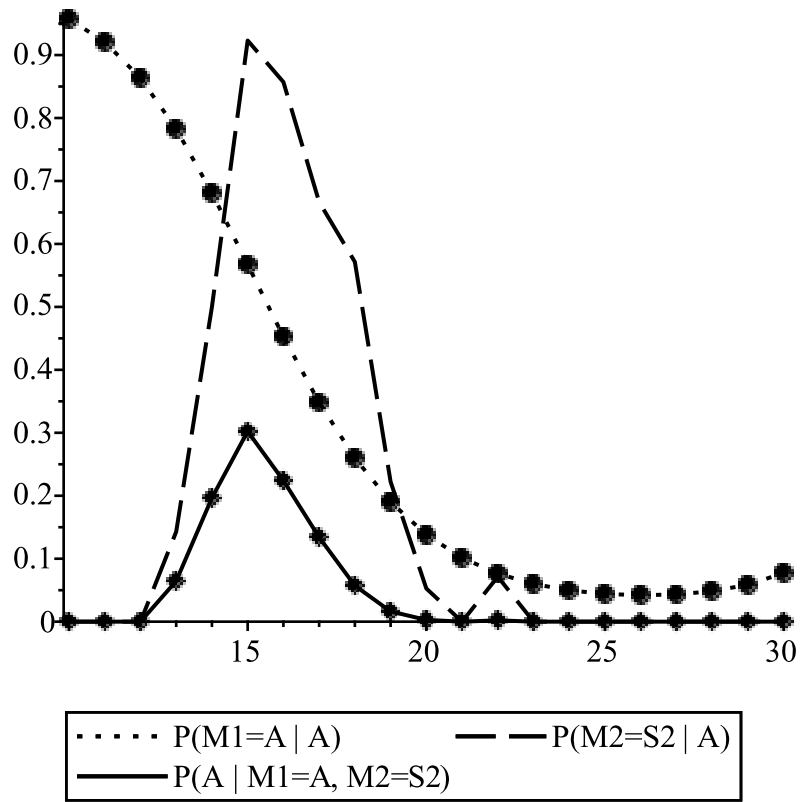

$ny2 := 3$

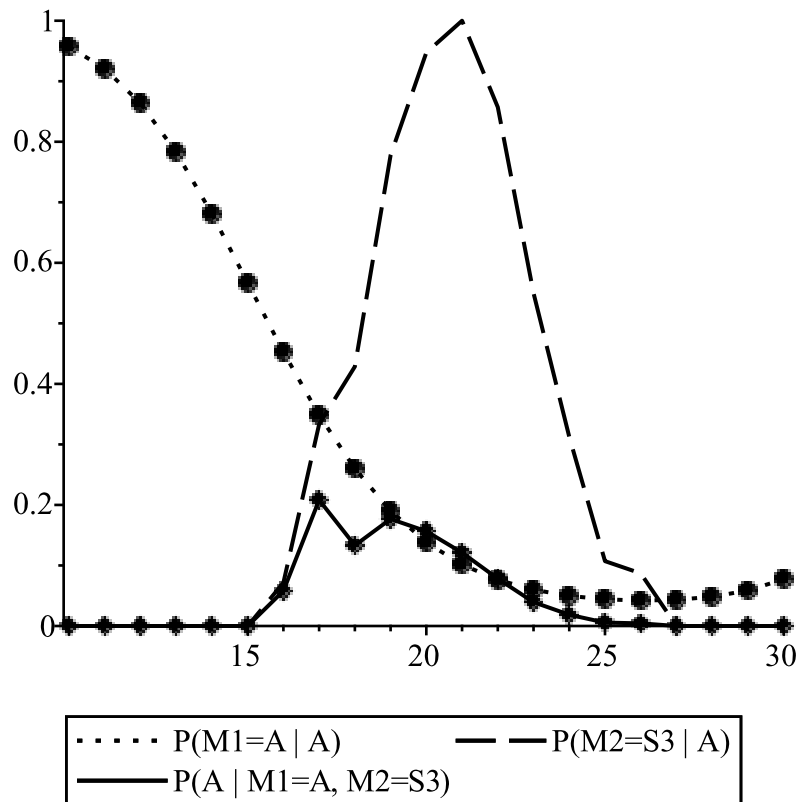

$ny2 := 4$



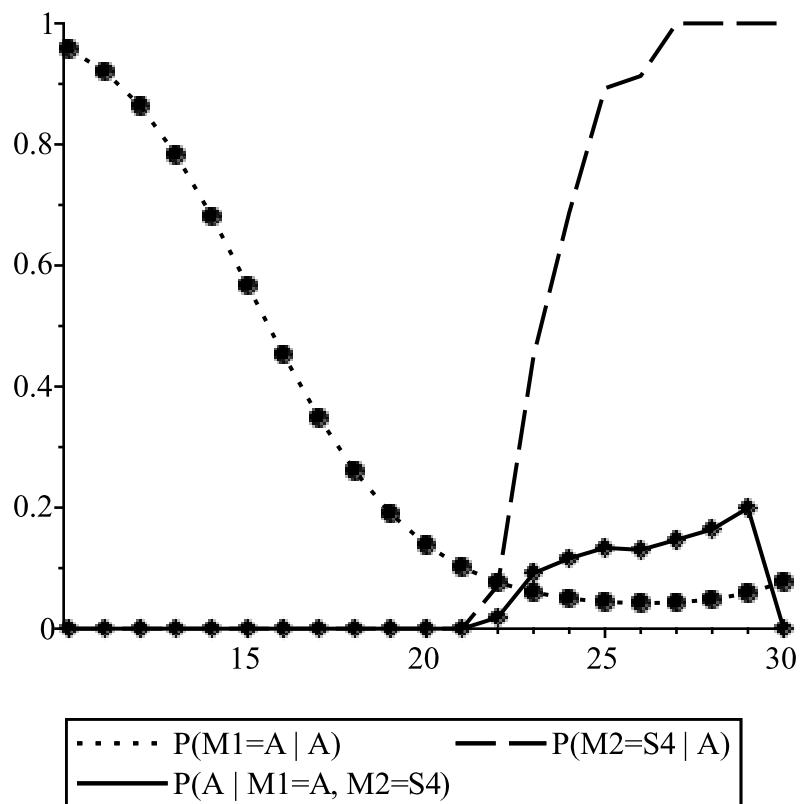

$ny2 := 5$

$ny1 := 2$

$ny2 := 1$

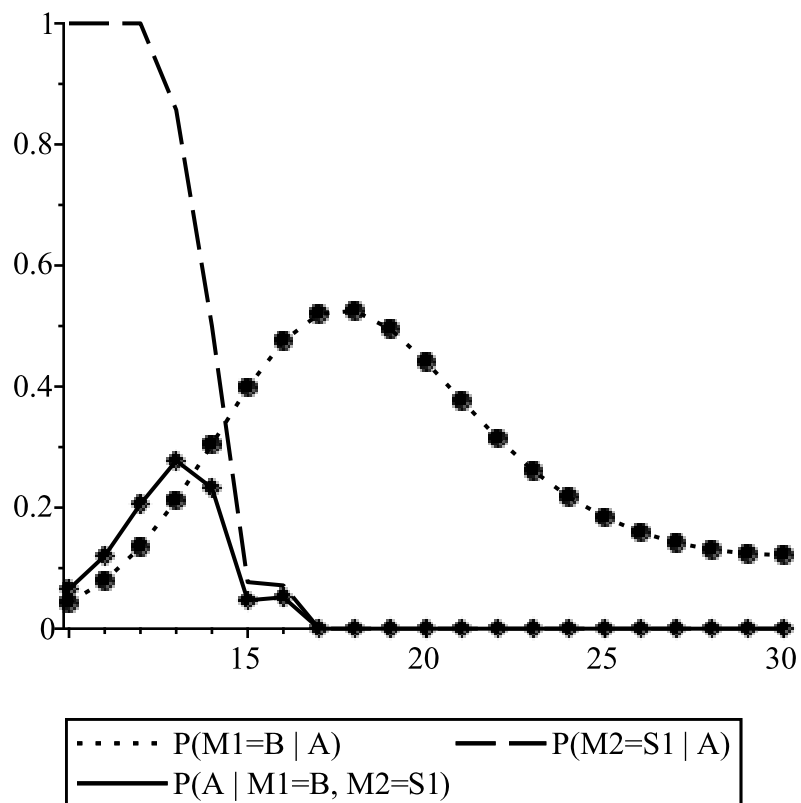

$ny2 := 2$

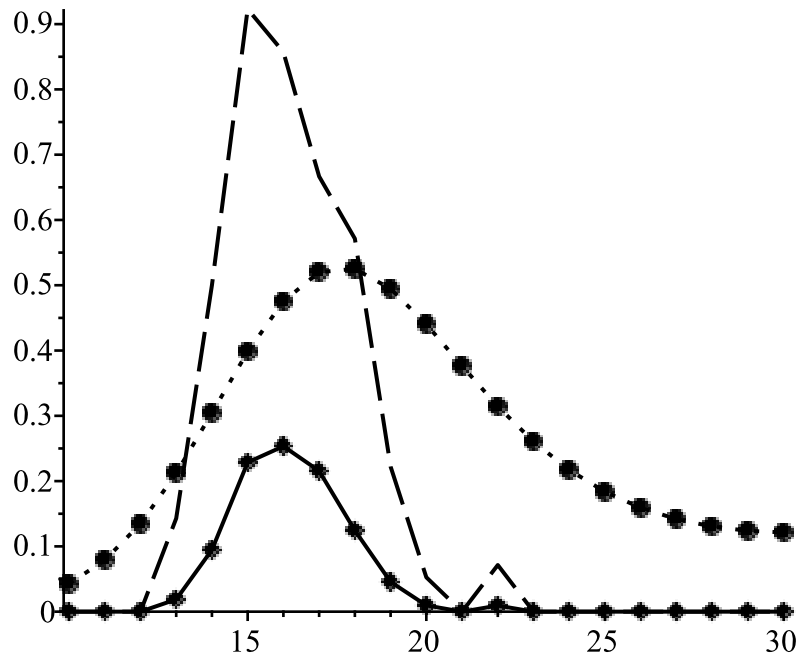

.....  $P(M1=B | A)$       - - -  $P(M2=S2 | A)$   
 ———  $P(A | M1=B, M2=S2)$

$ny2 := 3$

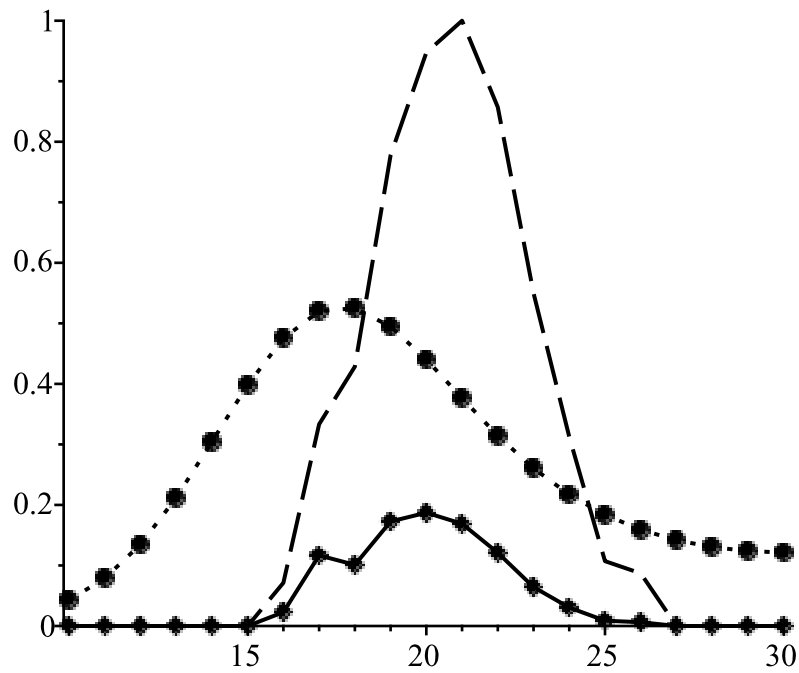

.....  $P(M1=B | A)$       - - -  $P(M2=S3 | A)$   
 ———  $P(A | M1=B, M2=S3)$

$ny2 := 4$

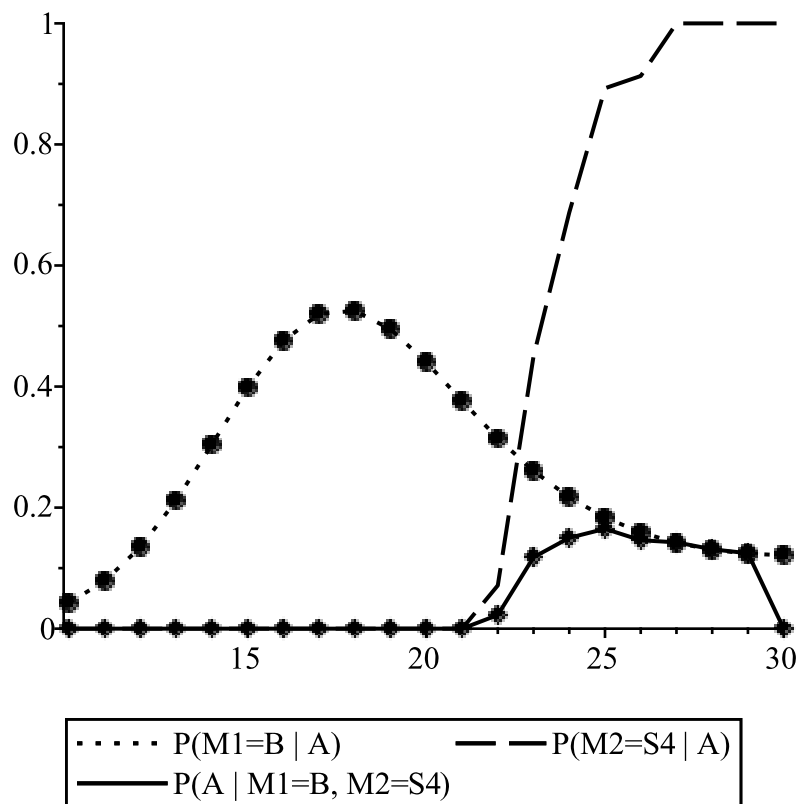

$ny2 := 5$

$ny1 := 3$

$ny2 := 1$

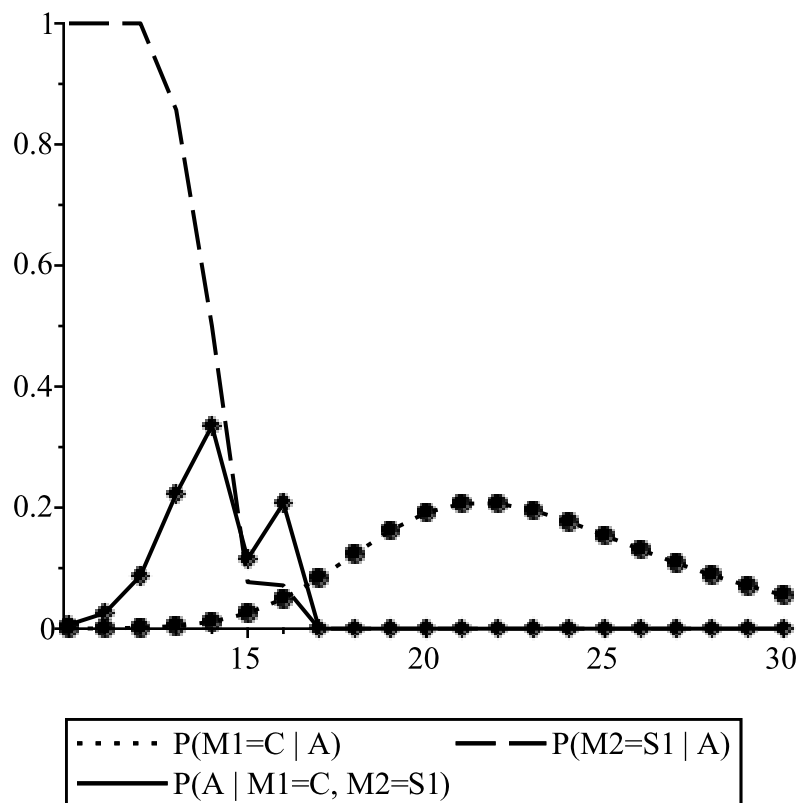

$ny2 := 2$

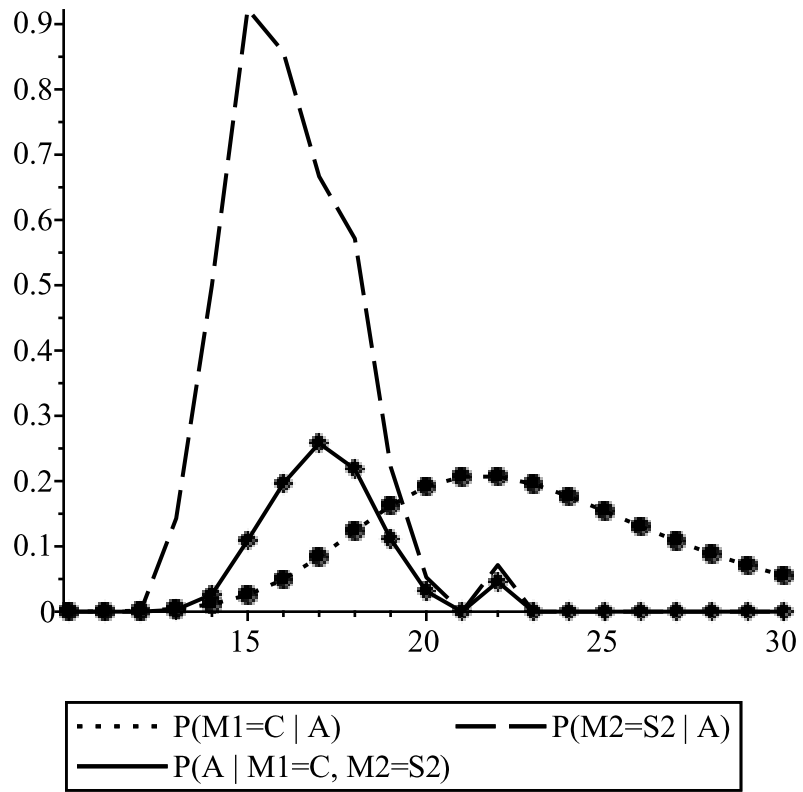

$ny2 := 3$

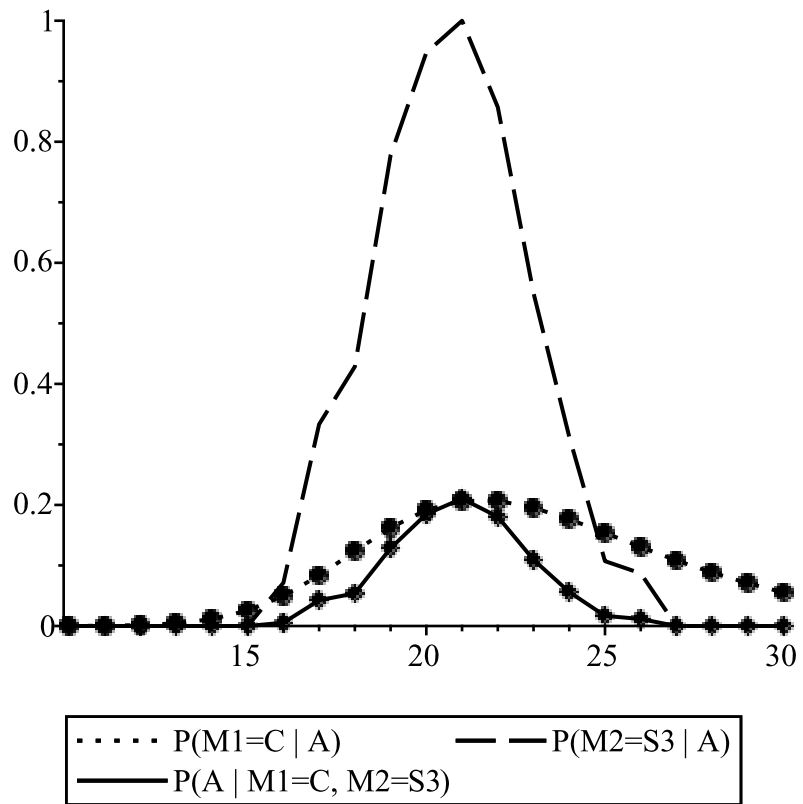

$ny2 := 4$

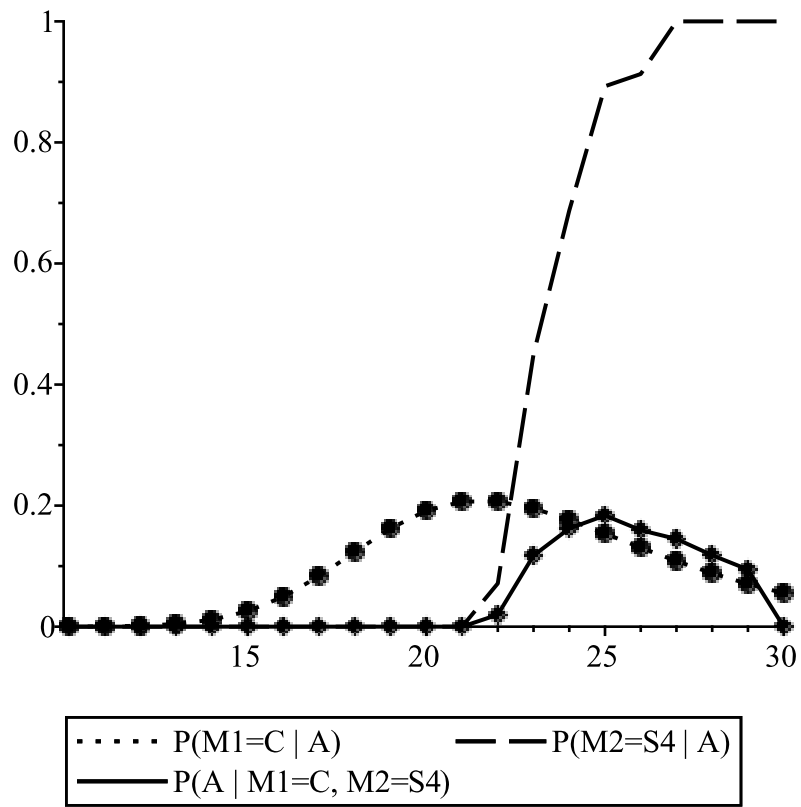

$ny2 := 5$

$ny1 := 4$

$ny2 := 1$

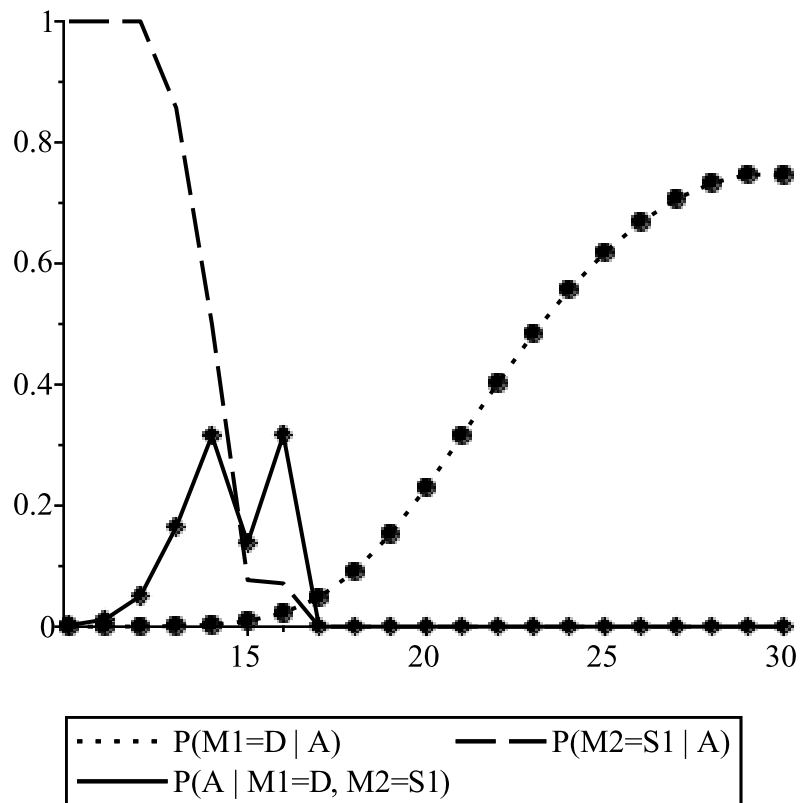

$ny2 := 2$

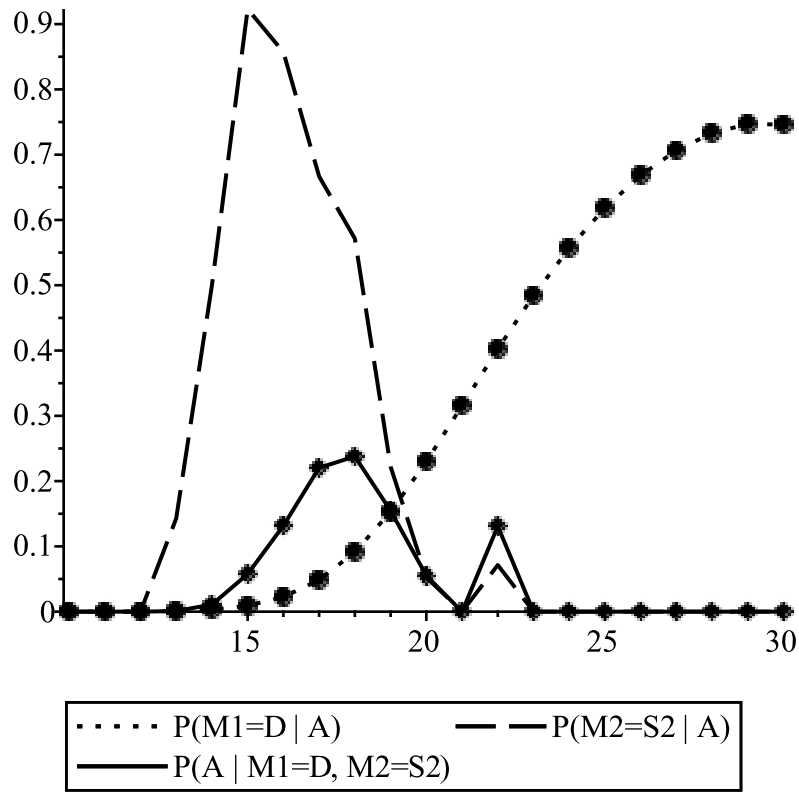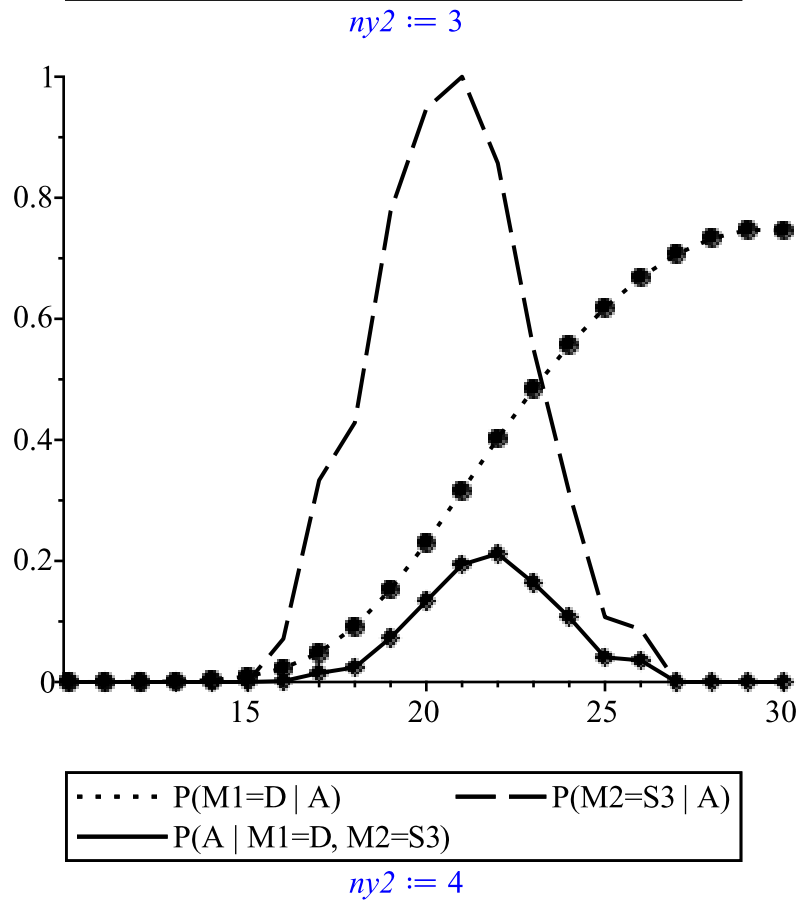

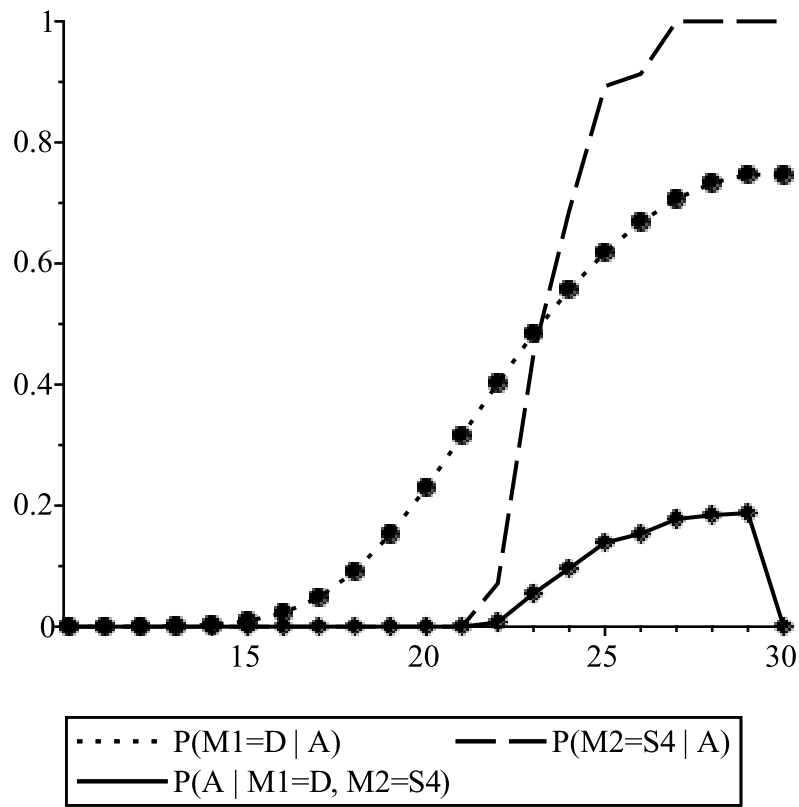

*ny2 := 5*

*ny1 := 5*

(68)

**for** *nx* **from** 1 **to** *NA* **do**

*dataplot*(*PM18A*[*nx*,..], *caption* = *typeset*("Output P(M18 | A=", *nx* + *AMinAlt*, ")");

**end do;**

*nx := 1*

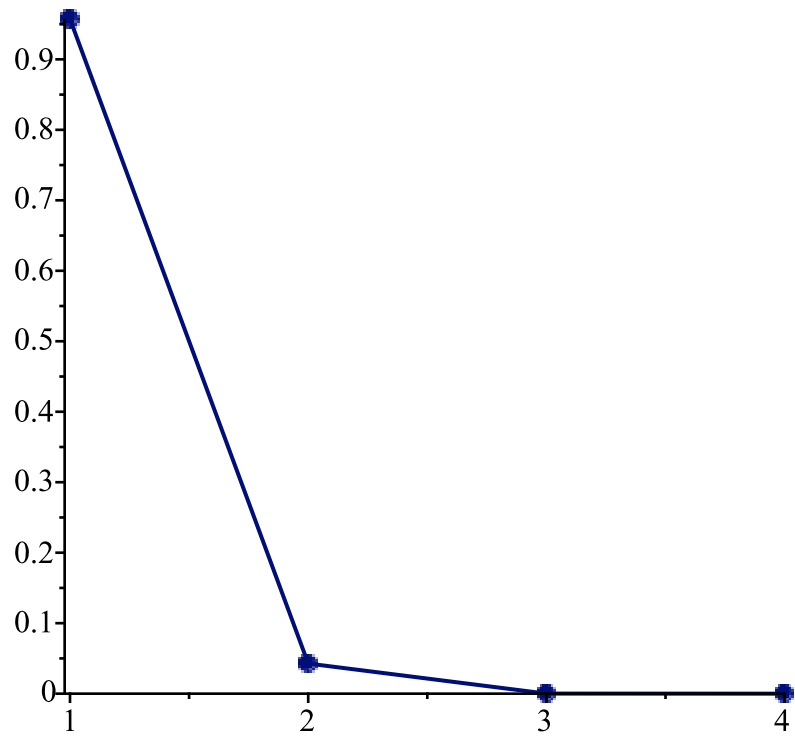

Output P(M18 | A=13)

*nx := 2*

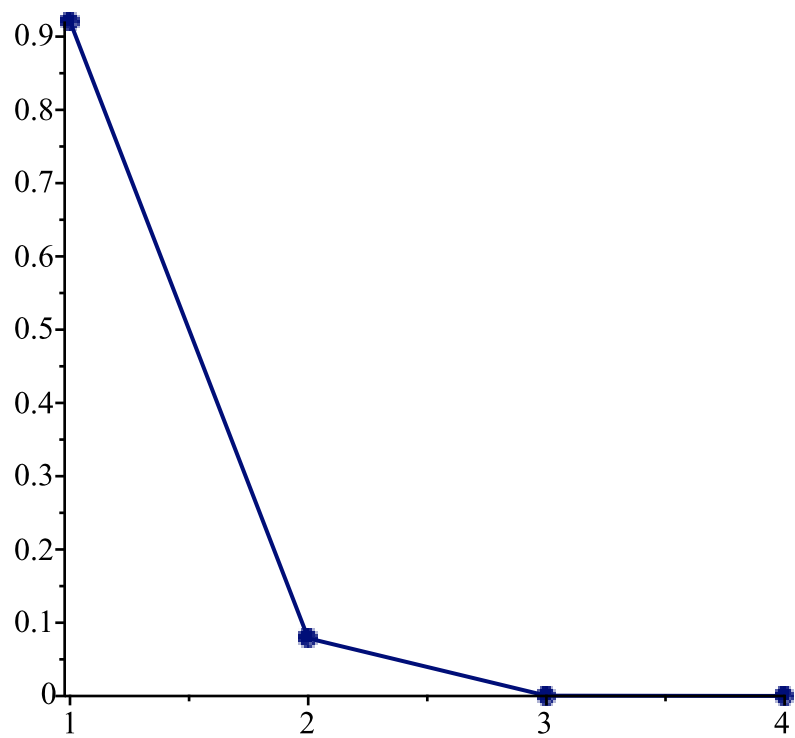

Output P(M18 | A=14)

*nx := 3*



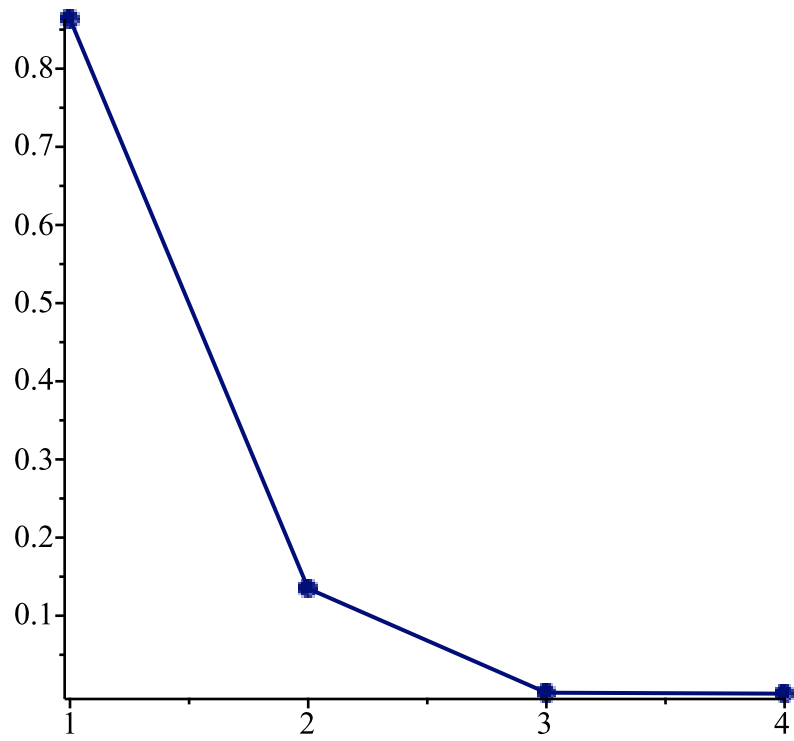

Output P(M18 | A=15)

*nx := 4*

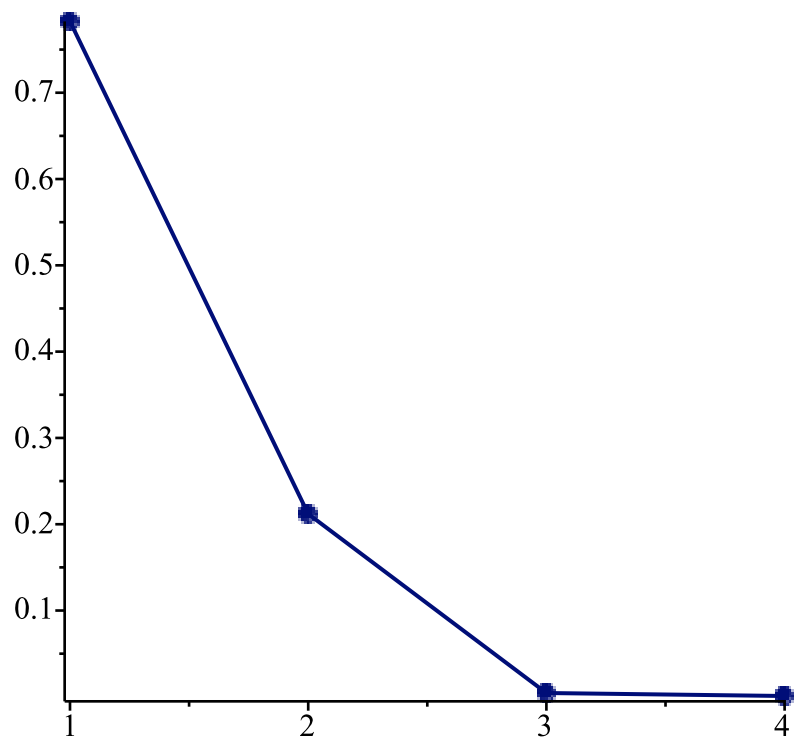

Output P(M18 | A=16)

*nx := 5*

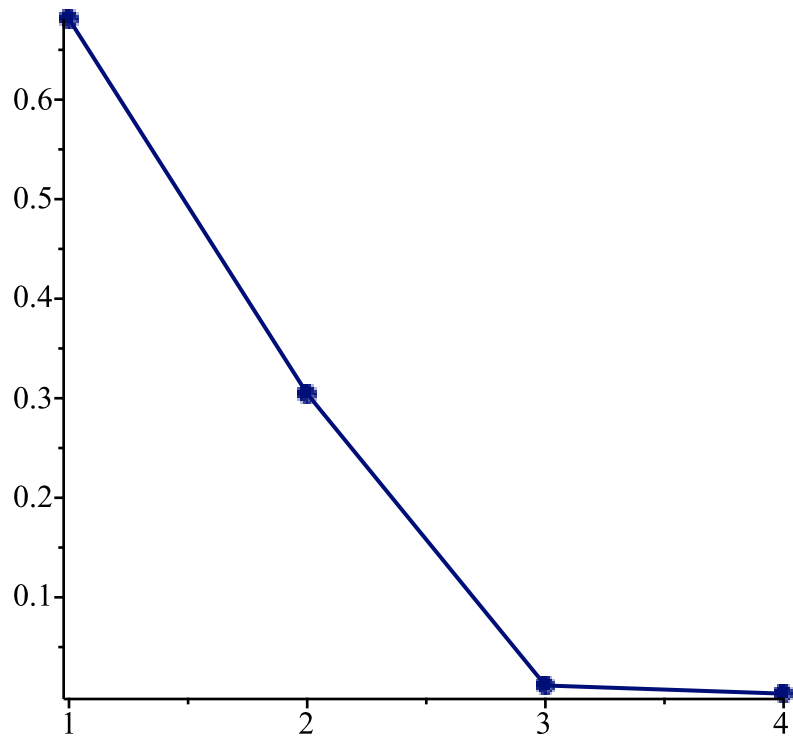

Output P(M18 | A=17)

*nx := 6*

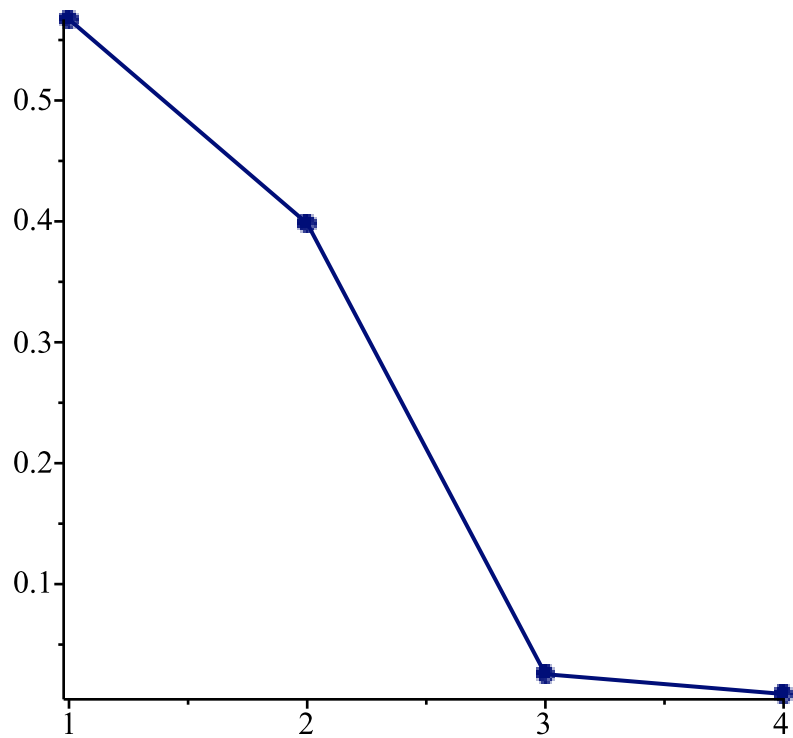

Output P(M18 | A=18)

*nx := 7*

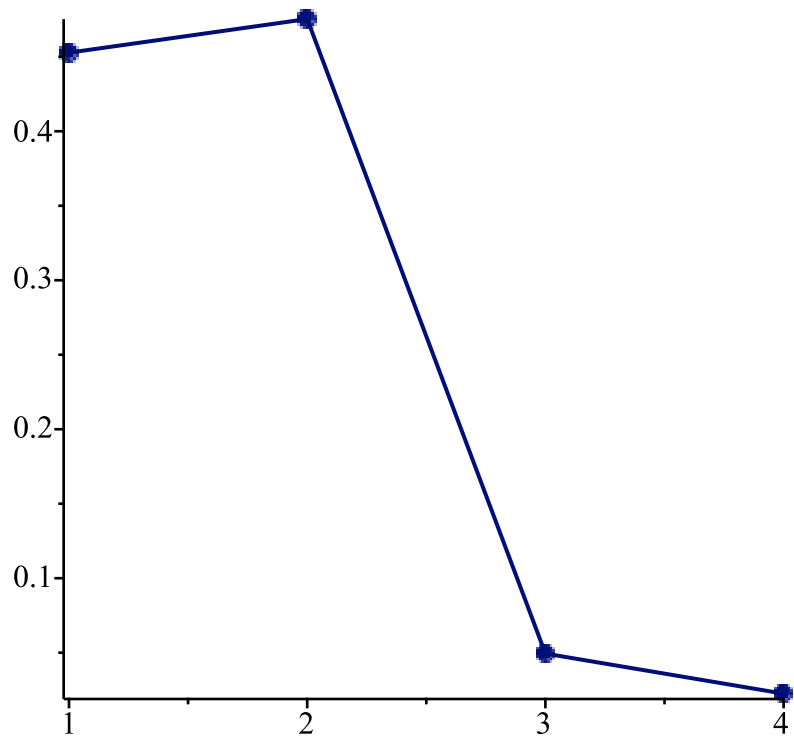

Output P(M18 | A=19)

*nx := 8*

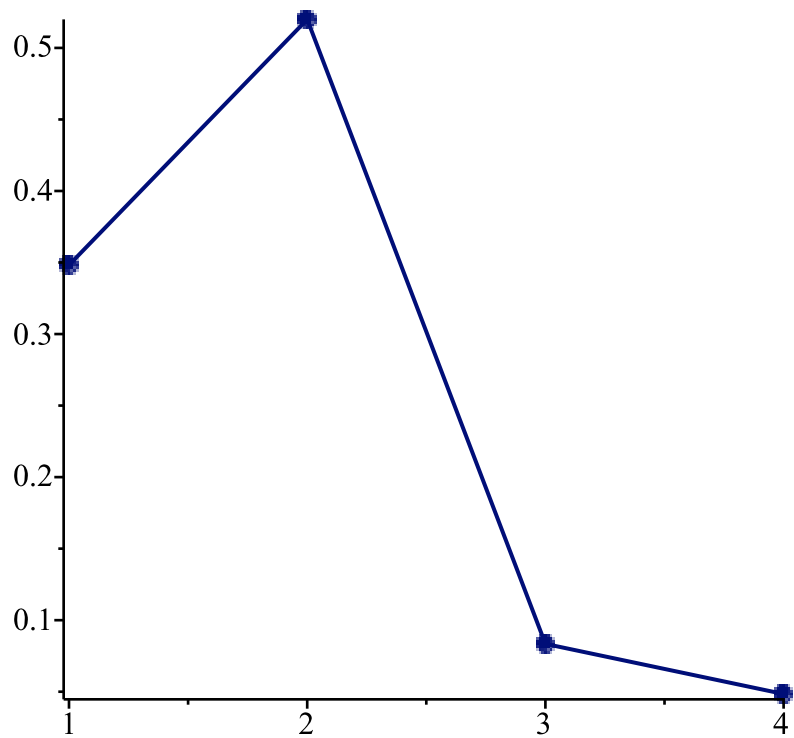

Output P(M18 | A=20)

*nx := 9*

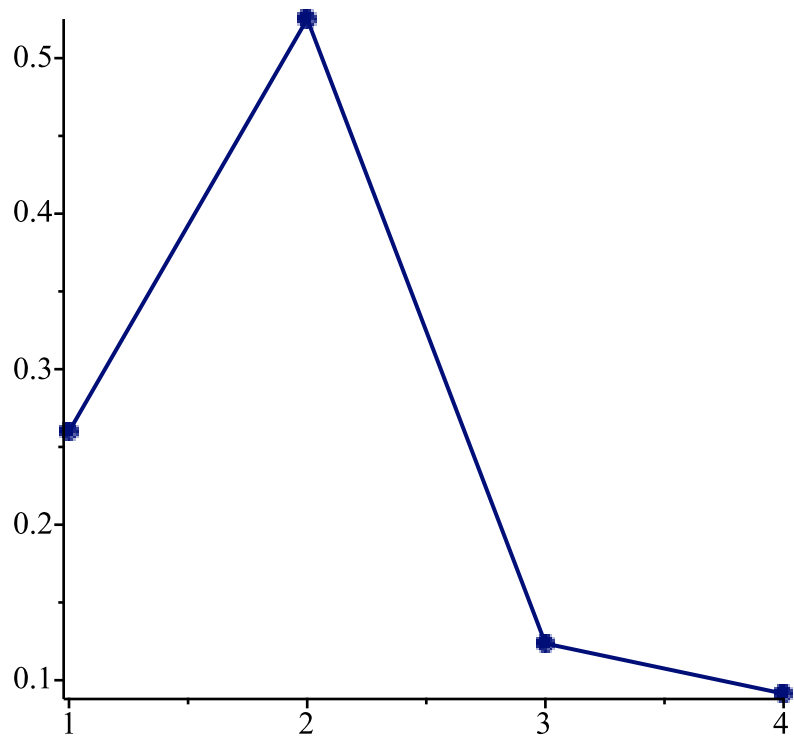

Output P(M18 | A=21)

*nx := 10*

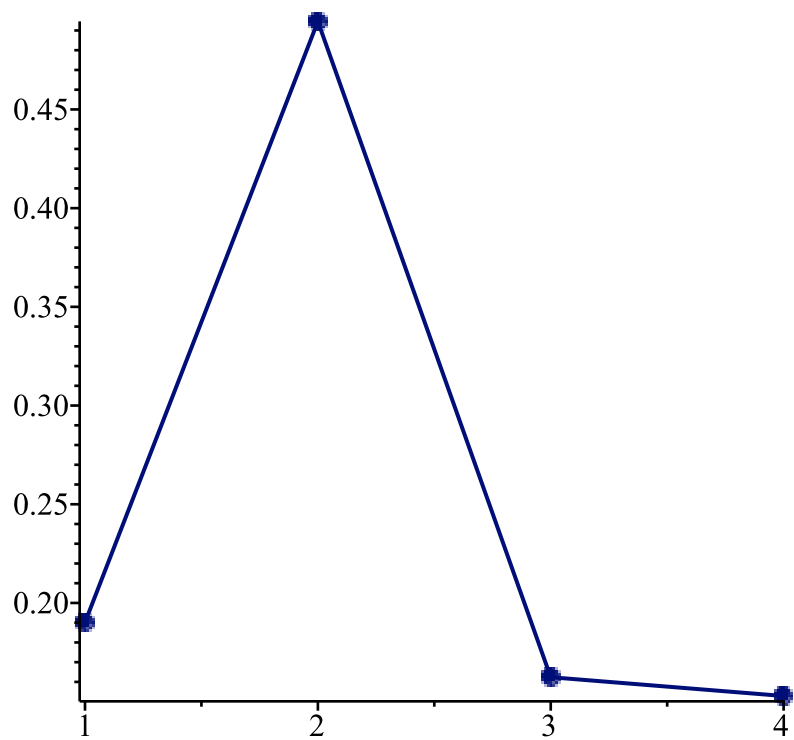

Output P(M18 | A=22)

*nx := 11*

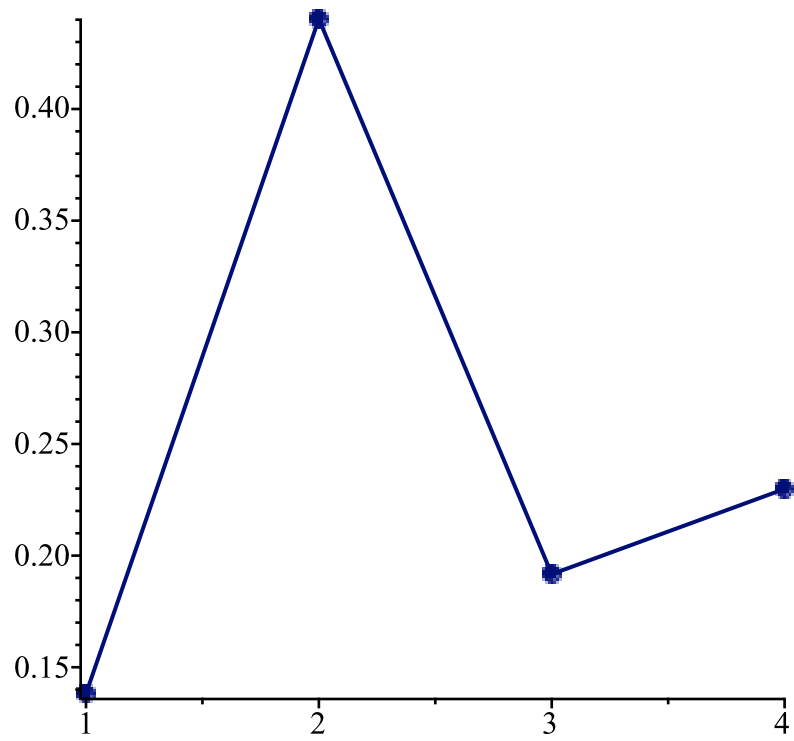

Output P(M18 | A=23)

*nx := 12*

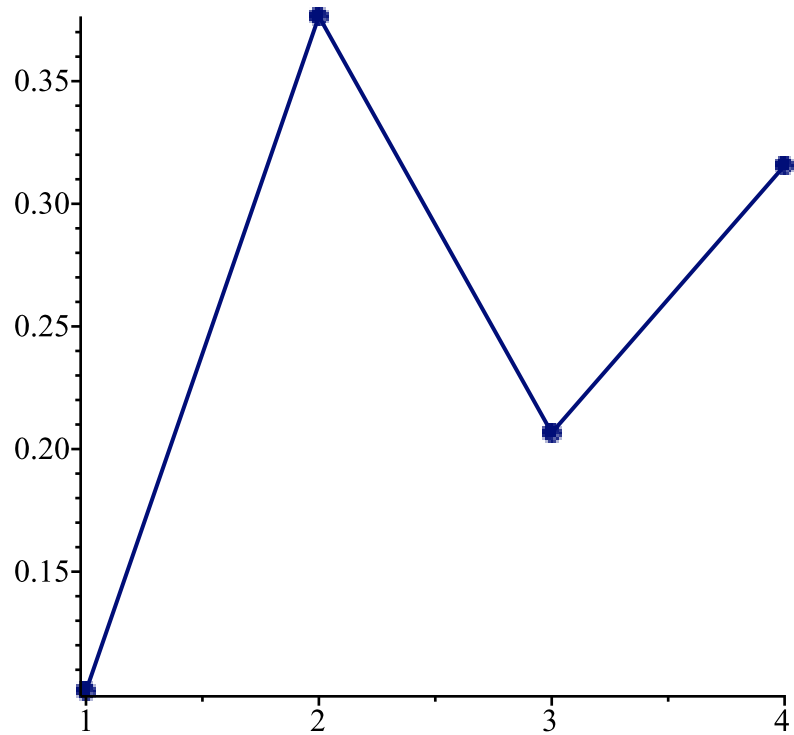

Output P(M18 | A=24)

*nx := 13*

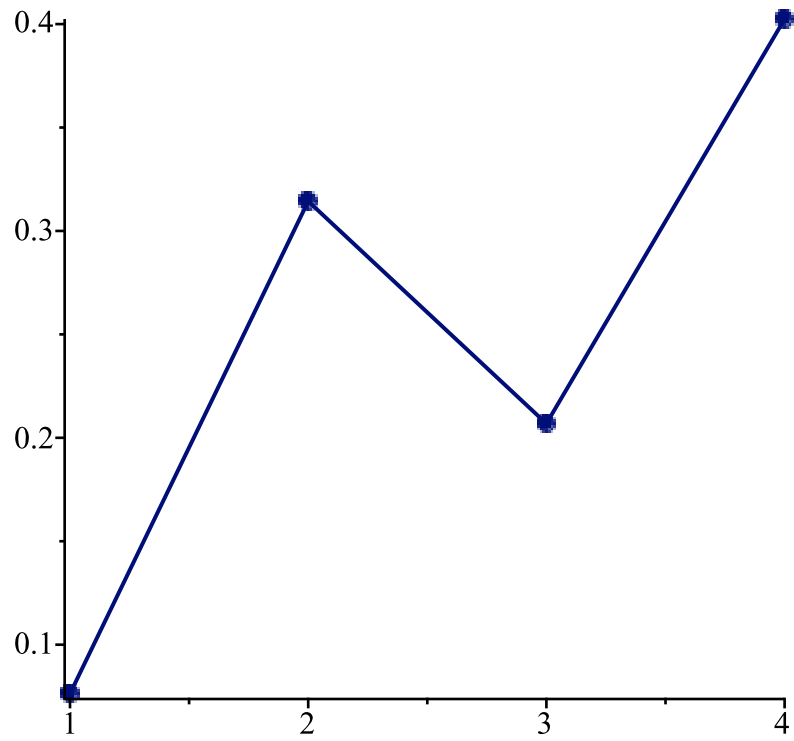

Output P(M18 | A=25)

*nx := 14*

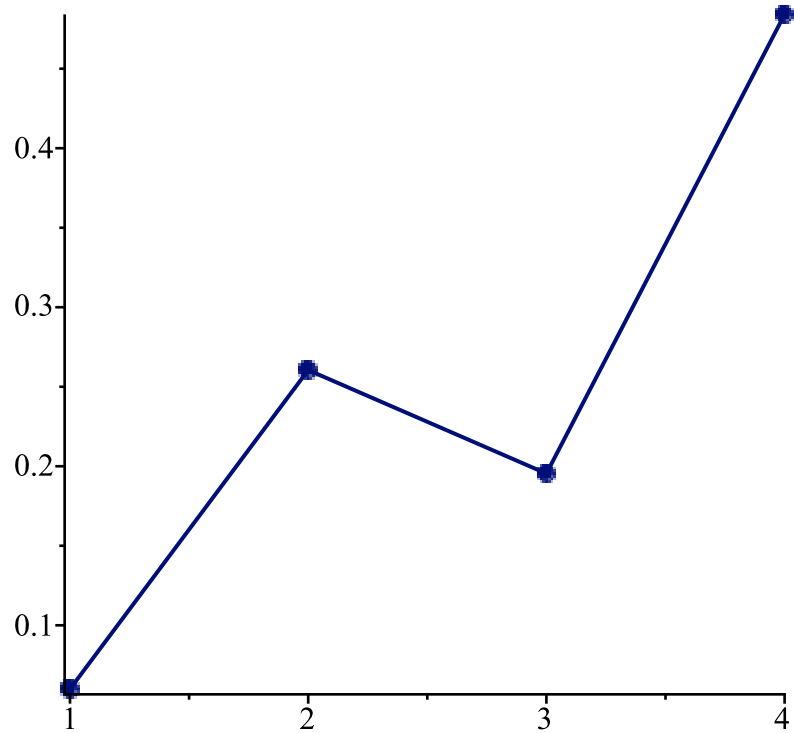

Output P(M18 | A=26)

*nx := 15*

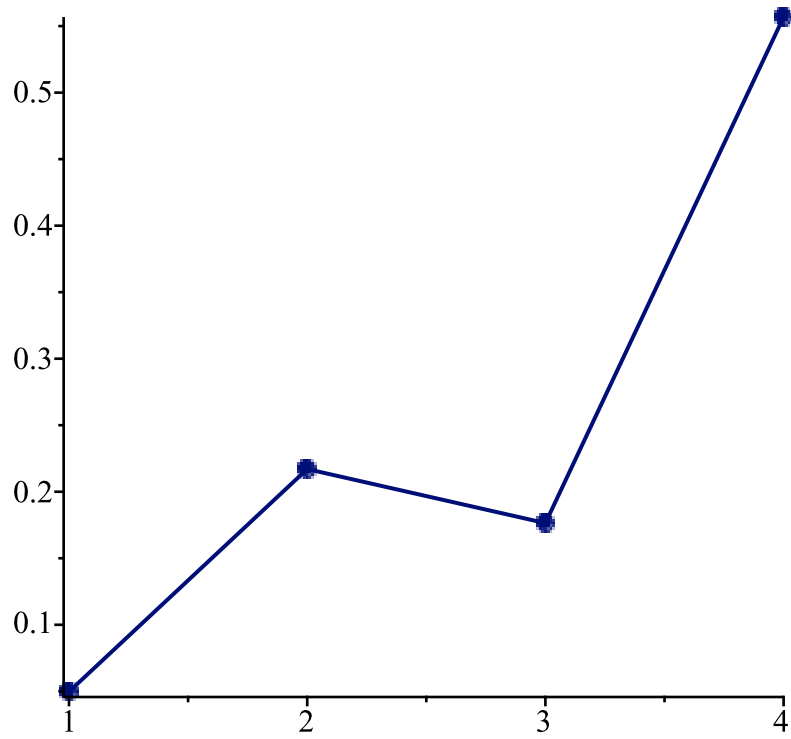

Output P(M18 | A=27)

*nx := 16*

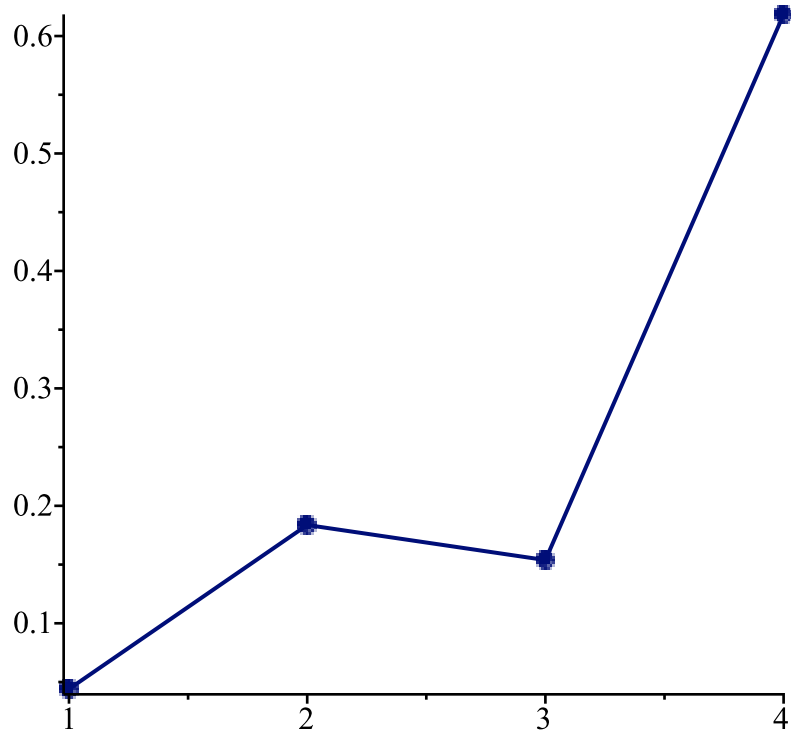

Output P(M18 | A=28)

*nx := 17*

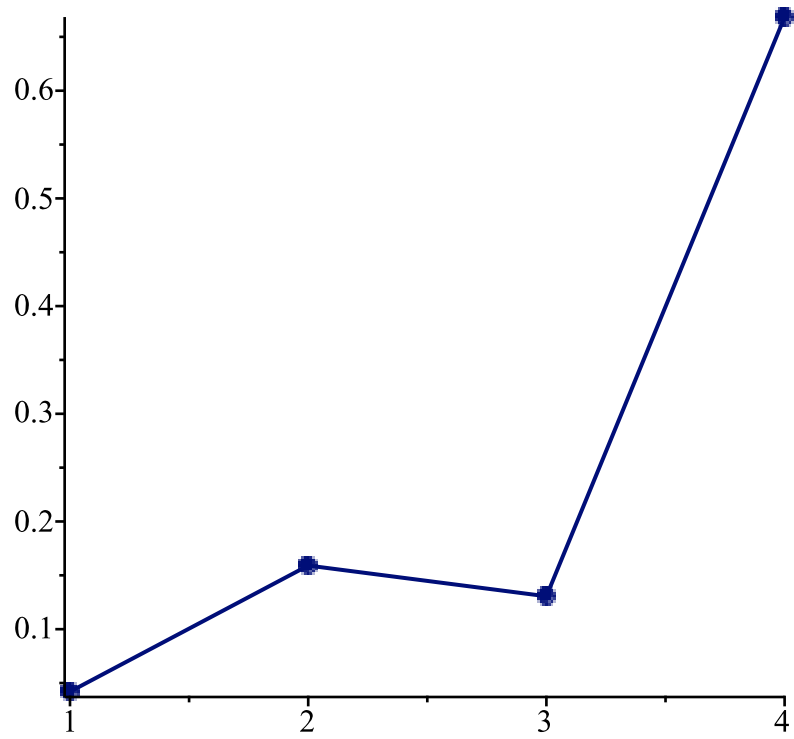

Output P(M18 | A=29)

*nx := 18*

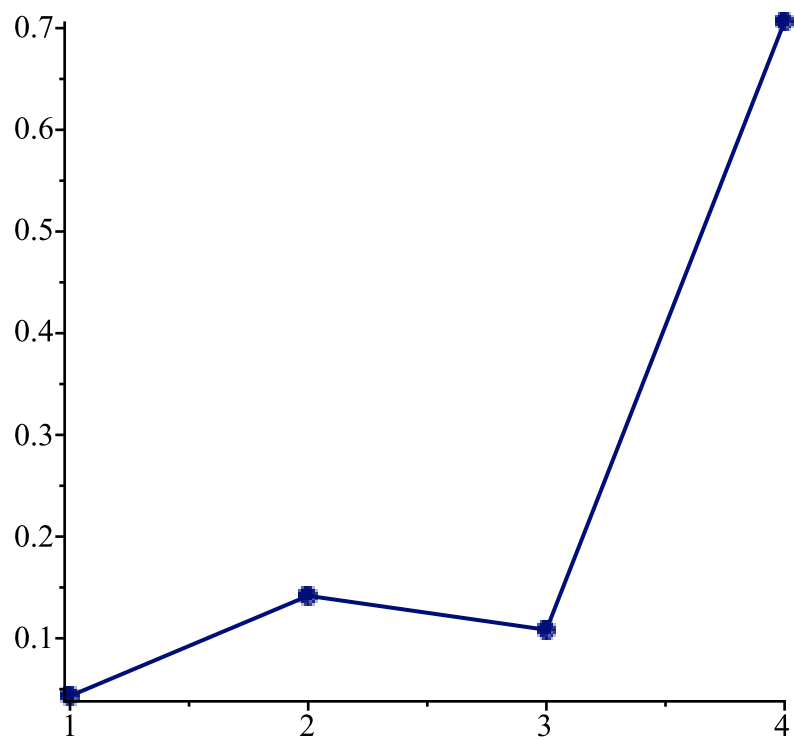

Output P(M18 | A=30)

*nx := 19*



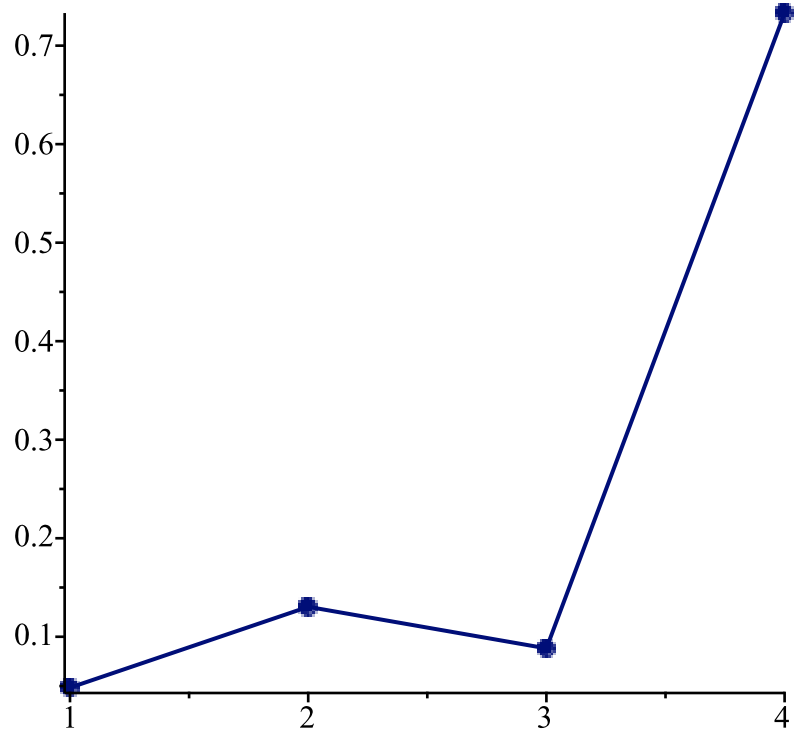

Output  $P(M18 | A=31)$

*nx := 20*

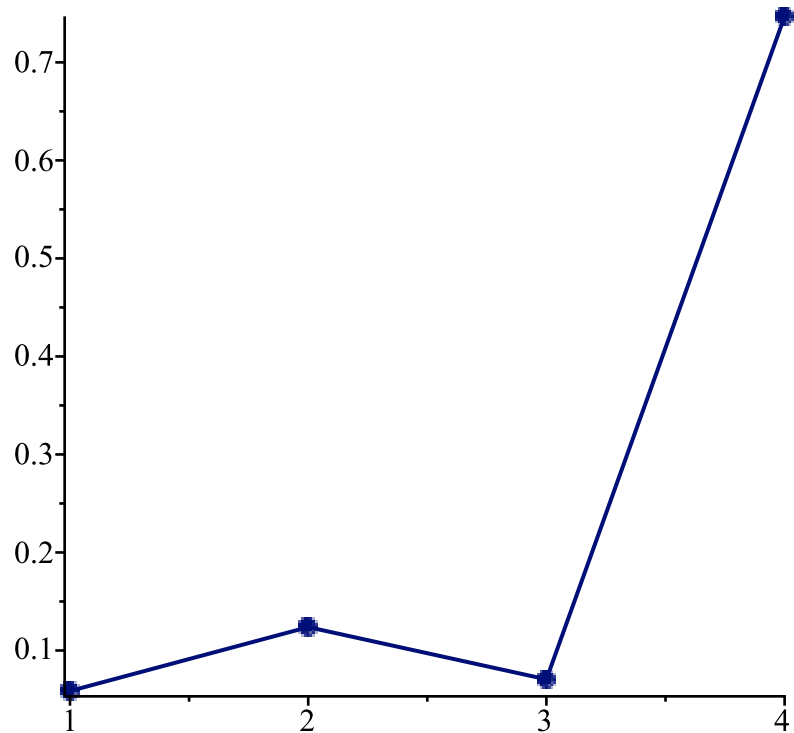

Output  $P(M18 | A=32)$

*nx := 21*

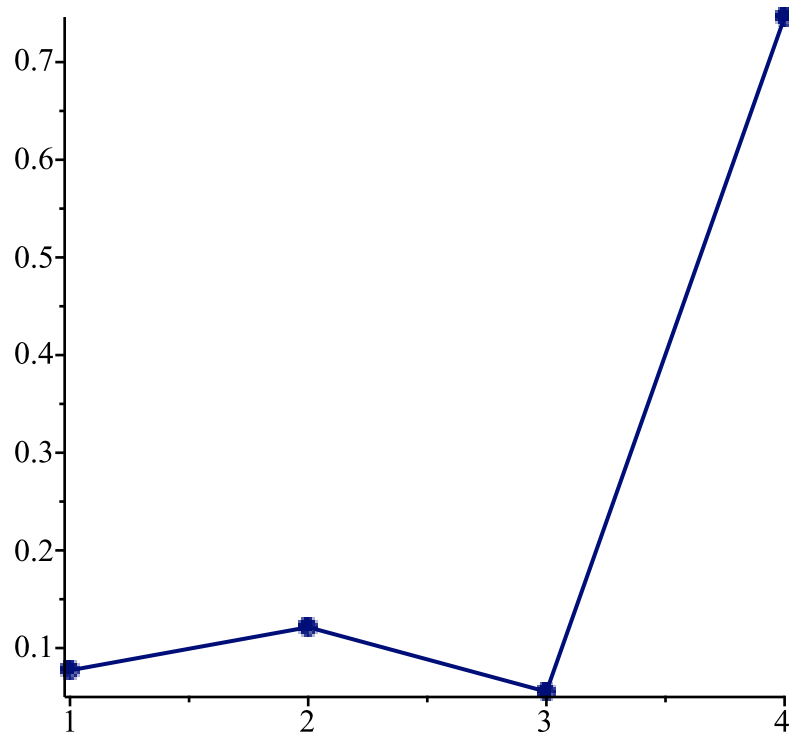

Output P(M18 | A=33)

*nx := 22*

(69)

**for** *nx* **from** 1 **to** *NA* **do**

*dataplot*(*PMA*[*nx*,..], *color* = "red", *caption* = *typeset*("Output P(M2 | A=", *nx* + *AMin*,  
")"));

**end do;**

*nx := 1*

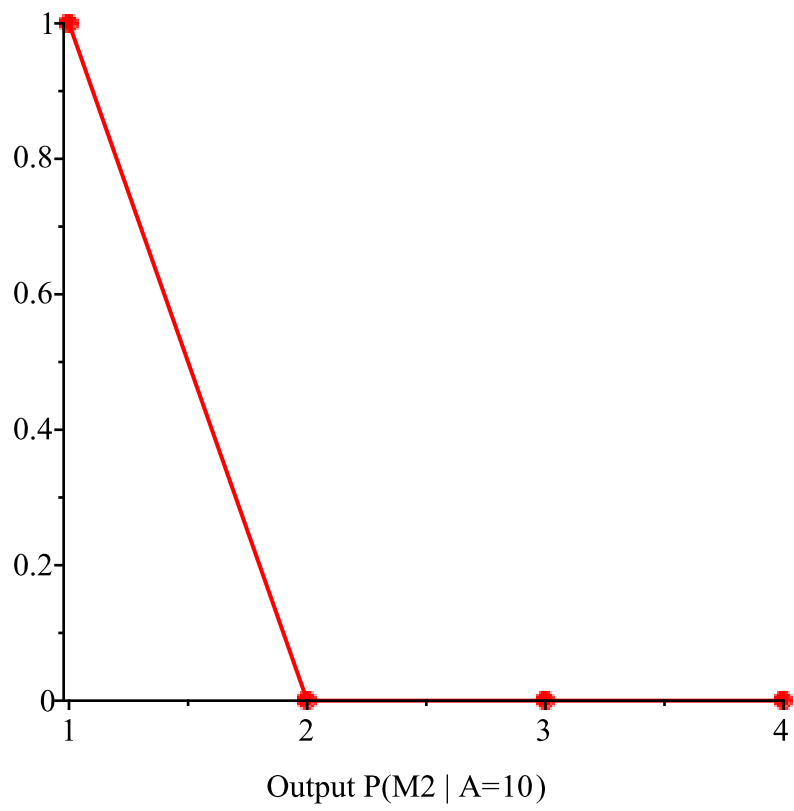

*nx := 2*

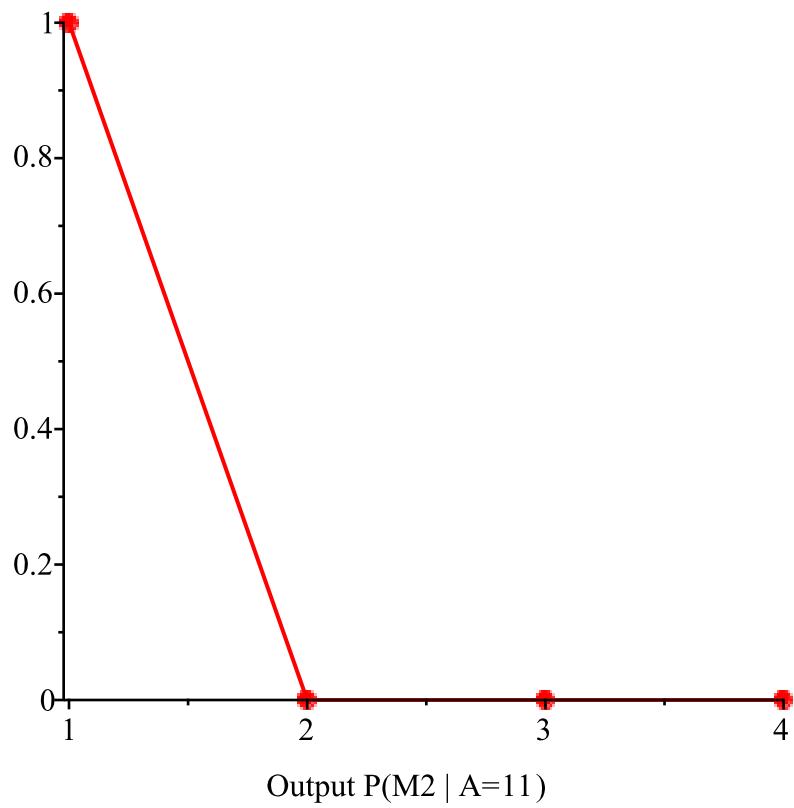

*nx := 3*

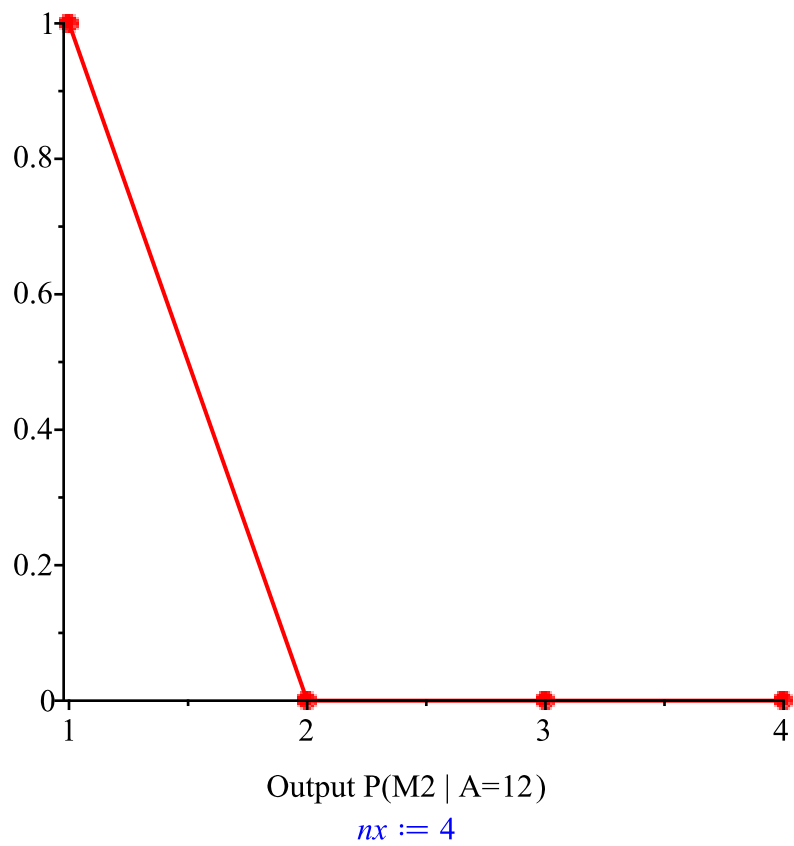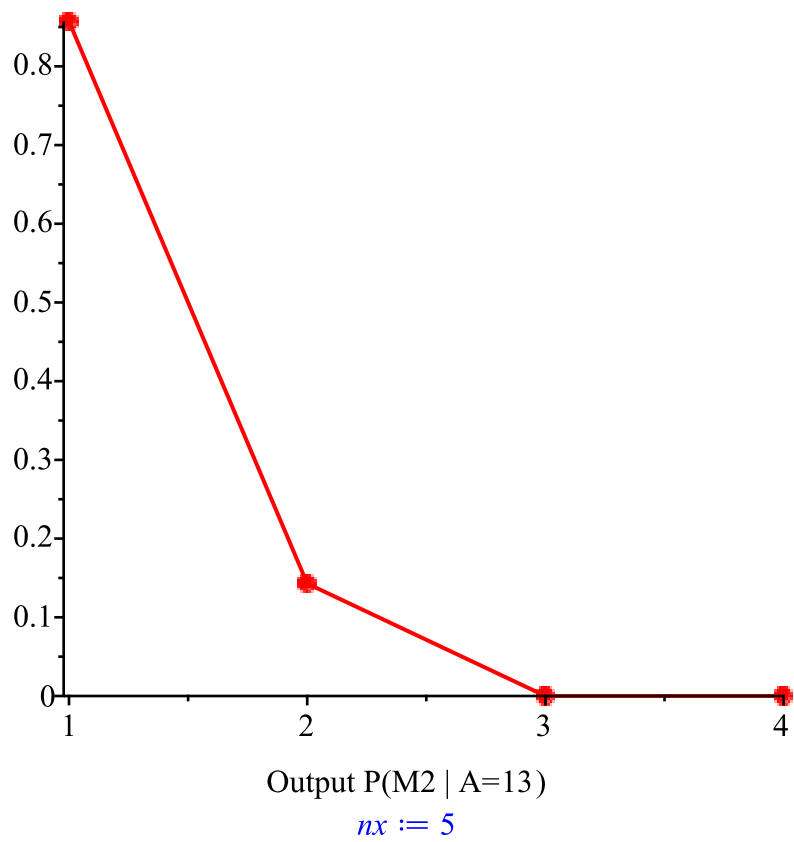

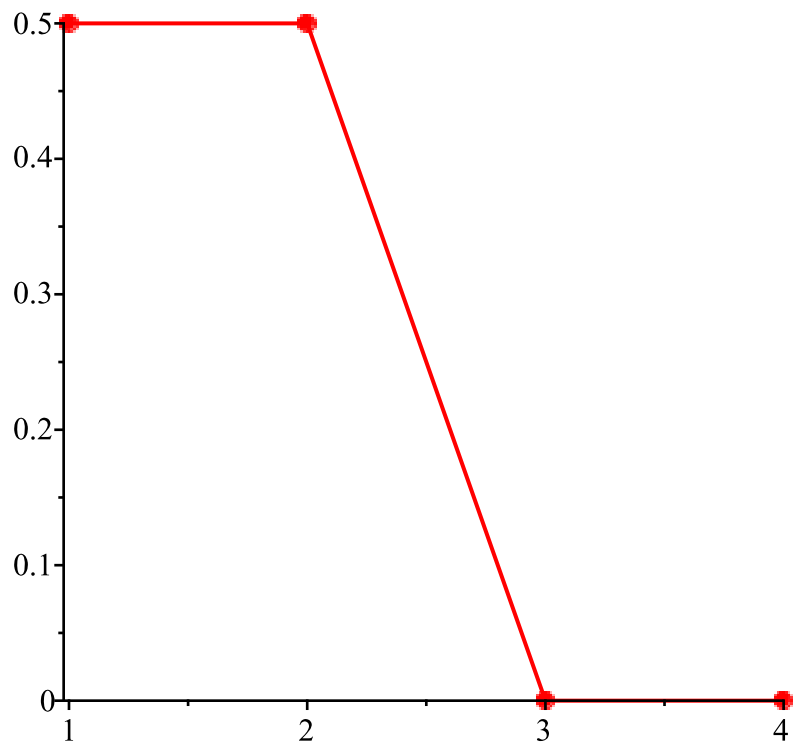

Output P(M2 | A=14)

*nx := 6*

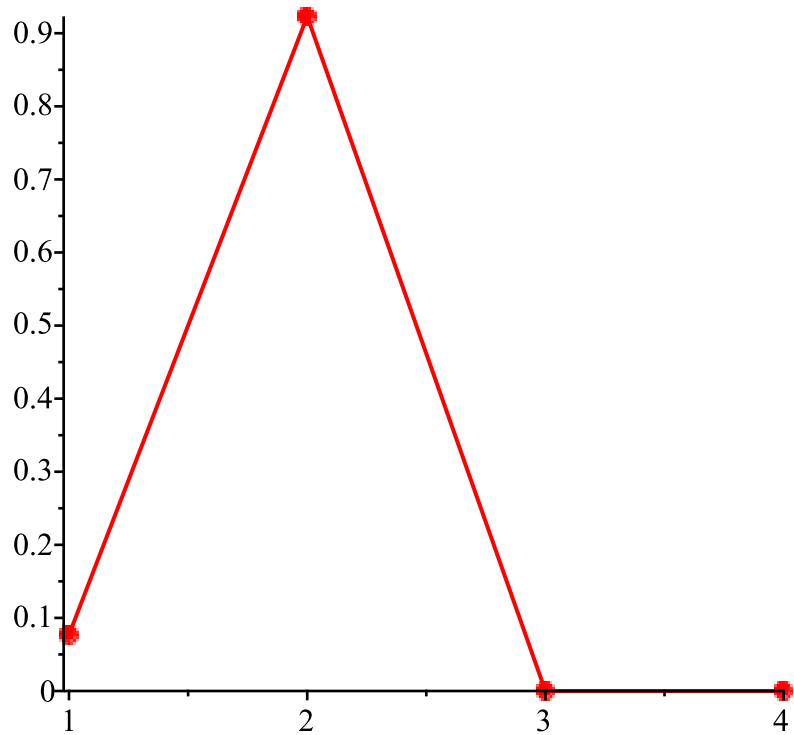

Output P(M2 | A=15)

*nx := 7*

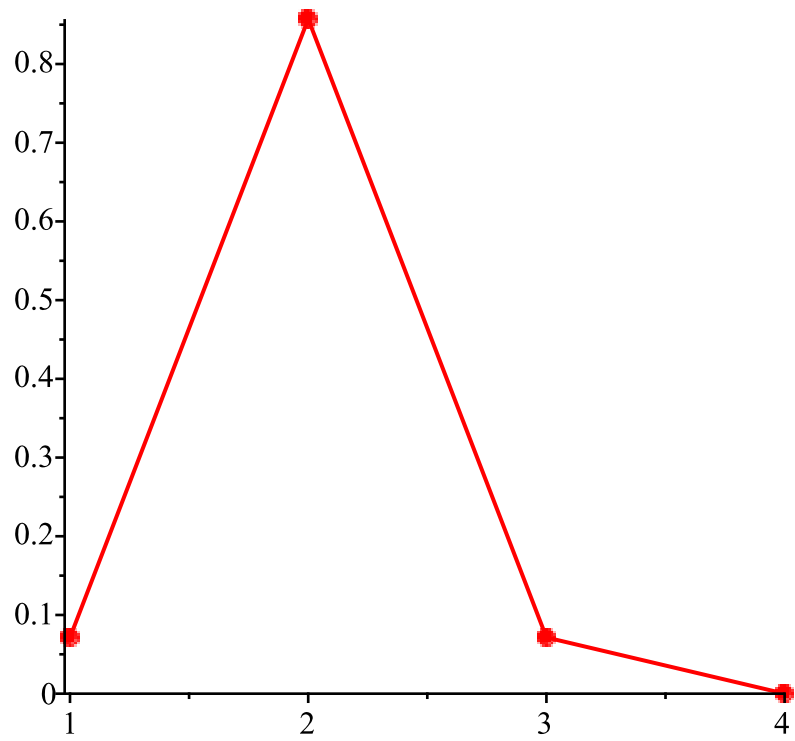

Output P(M2 | A=16)

*nx := 8*

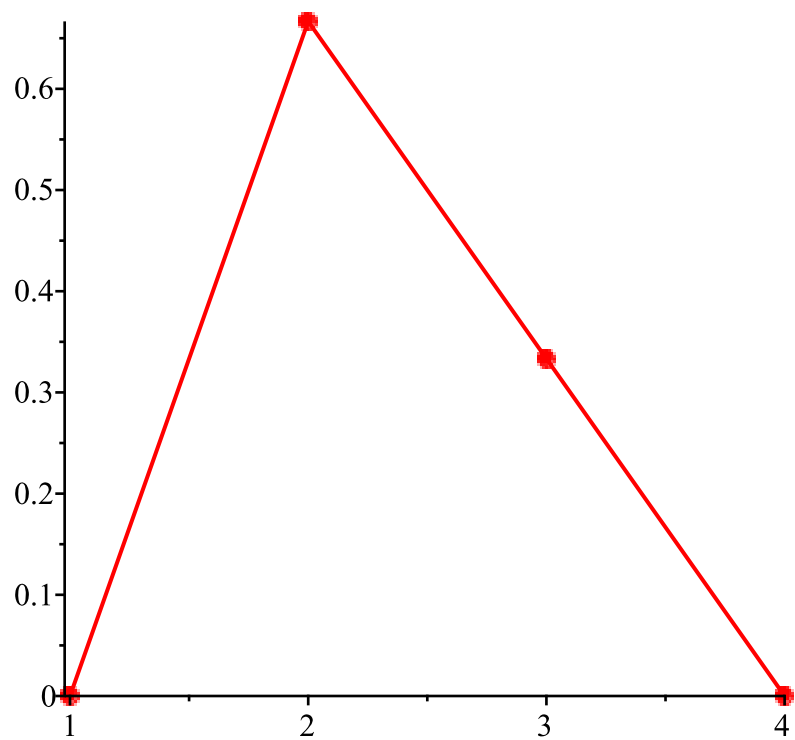

Output P(M2 | A=17)

*nx := 9*

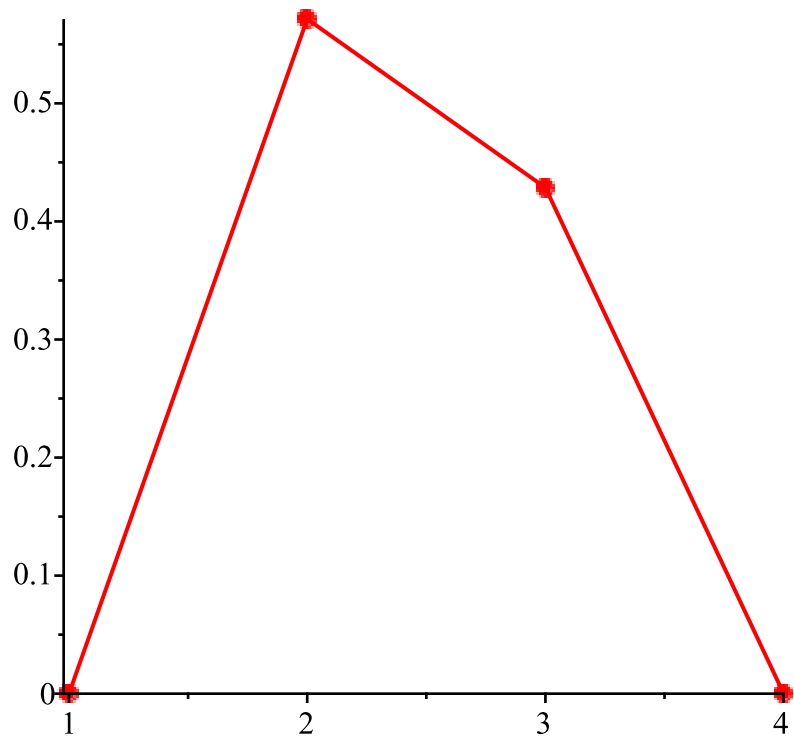

Output  $P(M2 | A=18)$

$nx := 10$

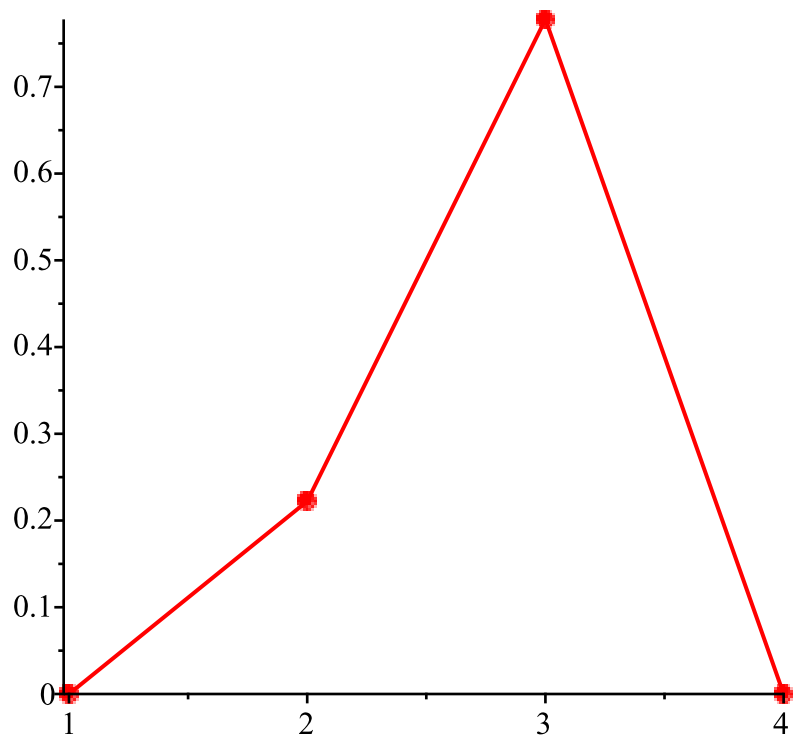

Output  $P(M2 | A=19)$

$nx := 11$

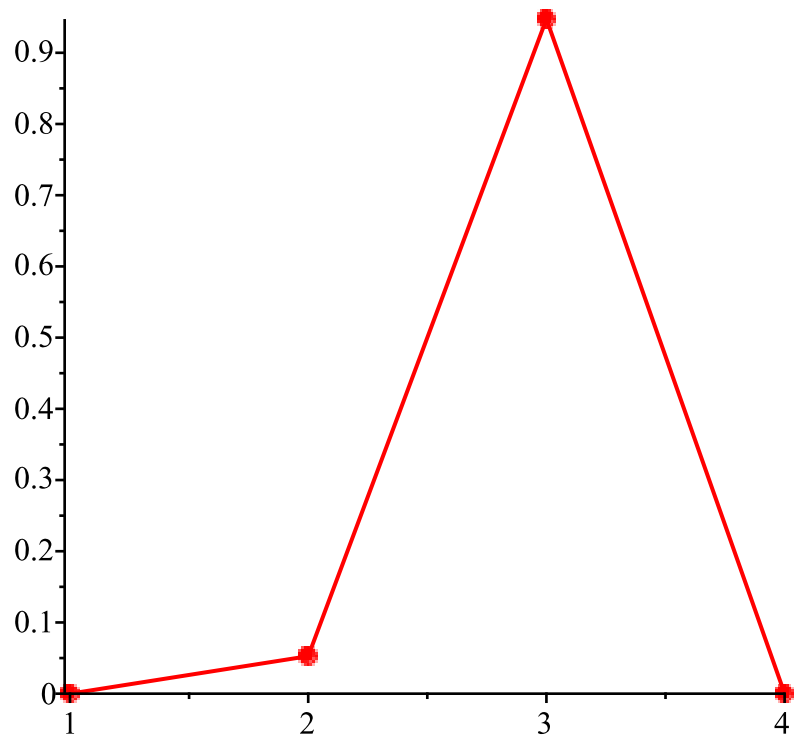

Output P(M2 | A=20)

*nx := 12*

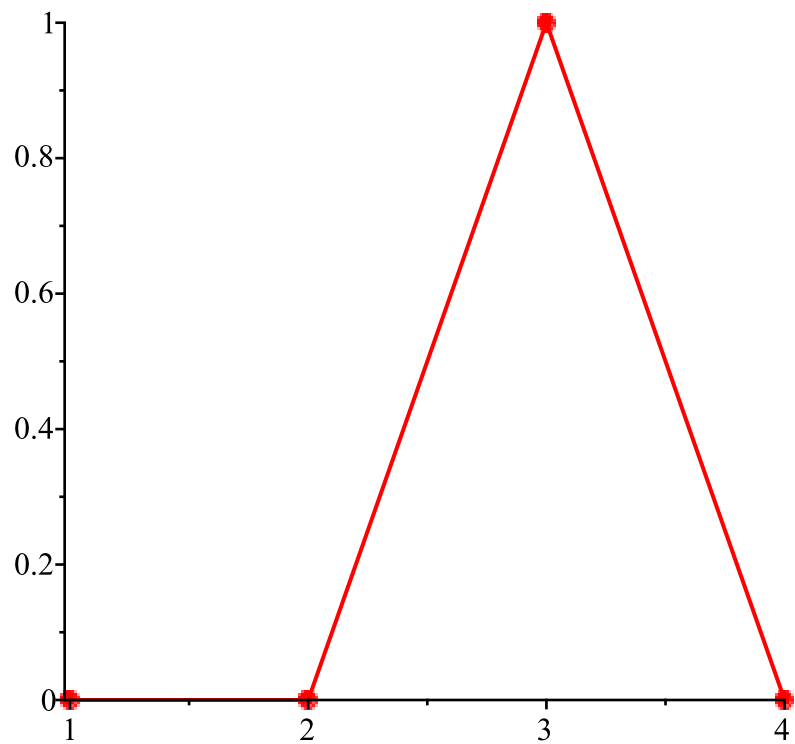

Output P(M2 | A=21)

*nx := 13*



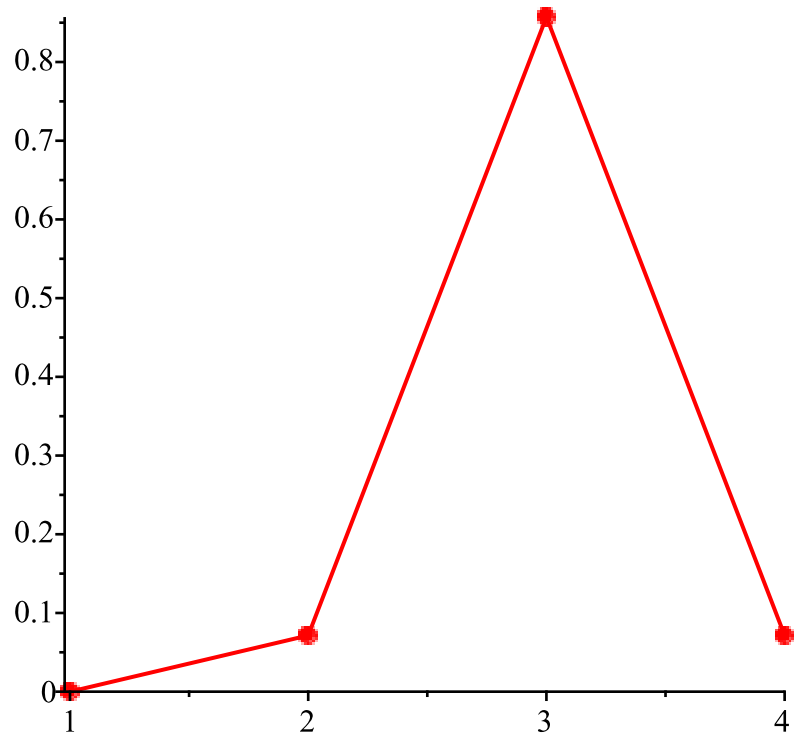

Output P(M2 | A=22)

*nx := 14*

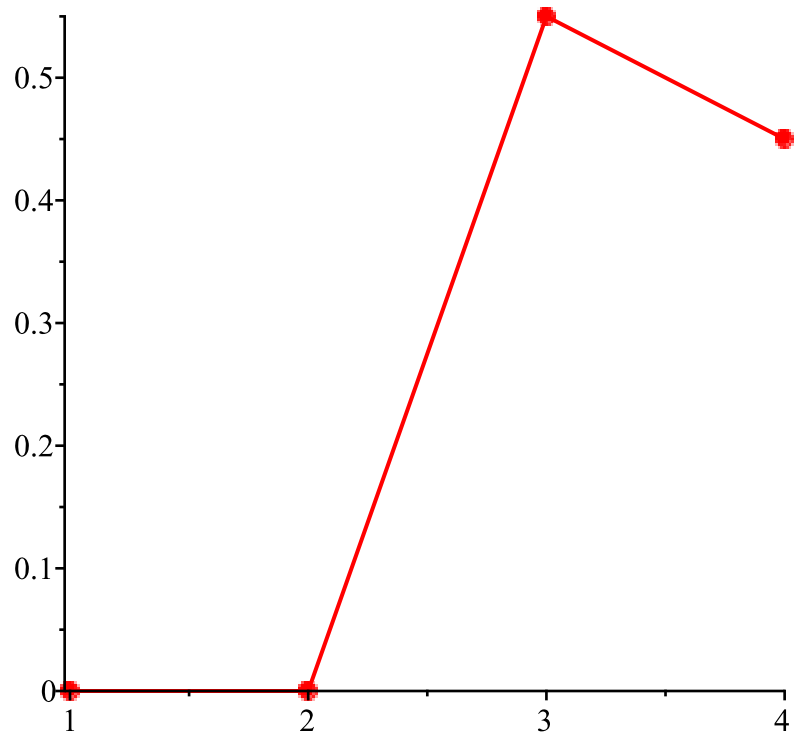

Output P(M2 | A=23)

*nx := 15*

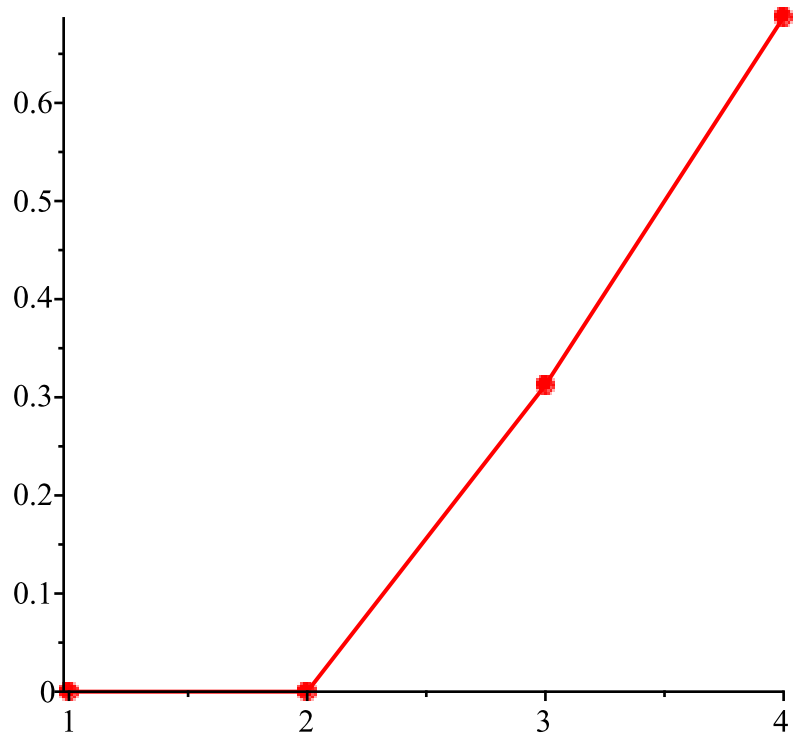

Output  $P(M2 | A=24)$

$nx := 16$

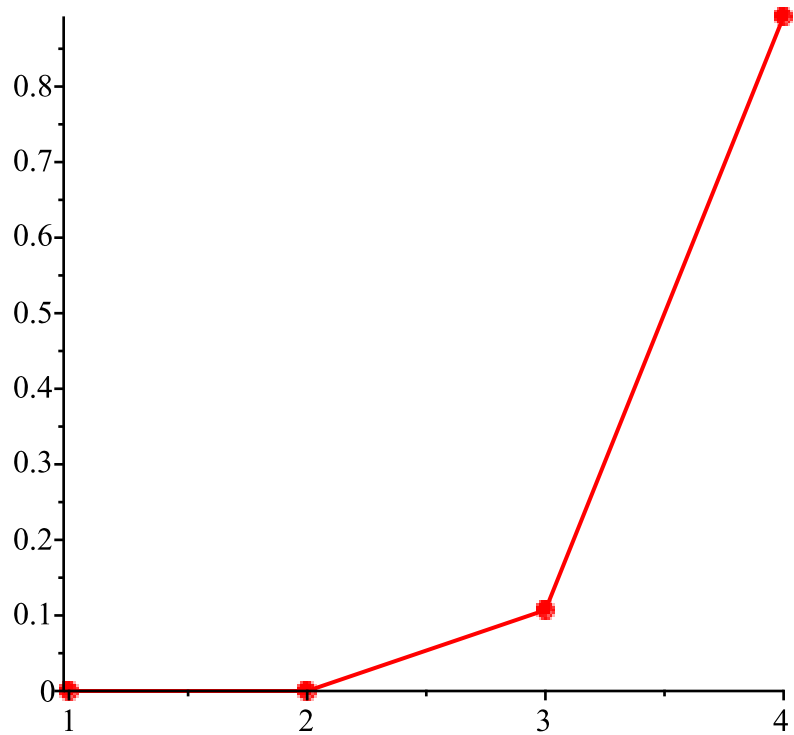

Output  $P(M2 | A=25)$

$nx := 17$

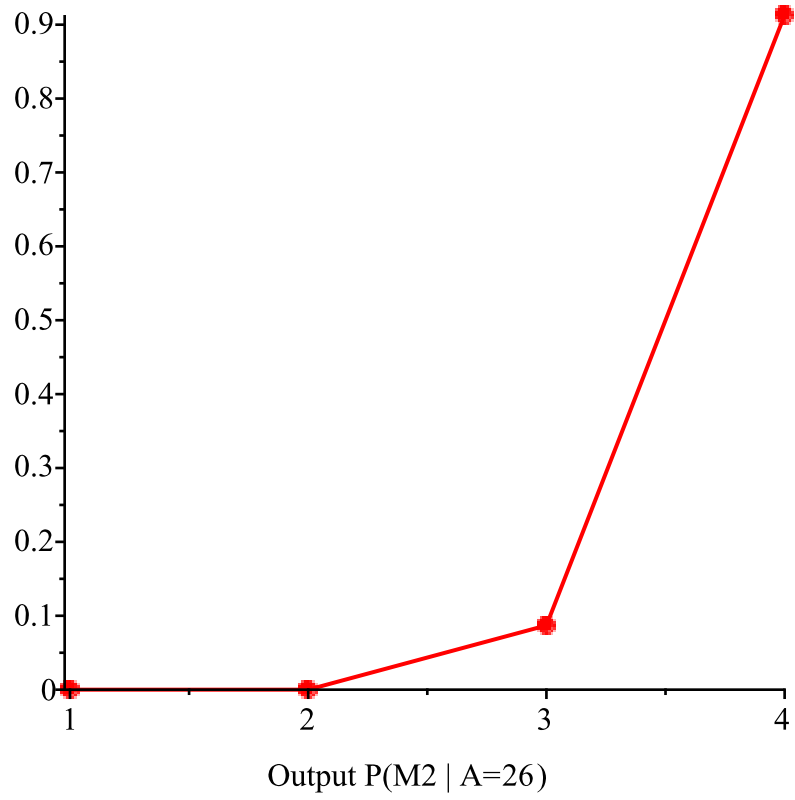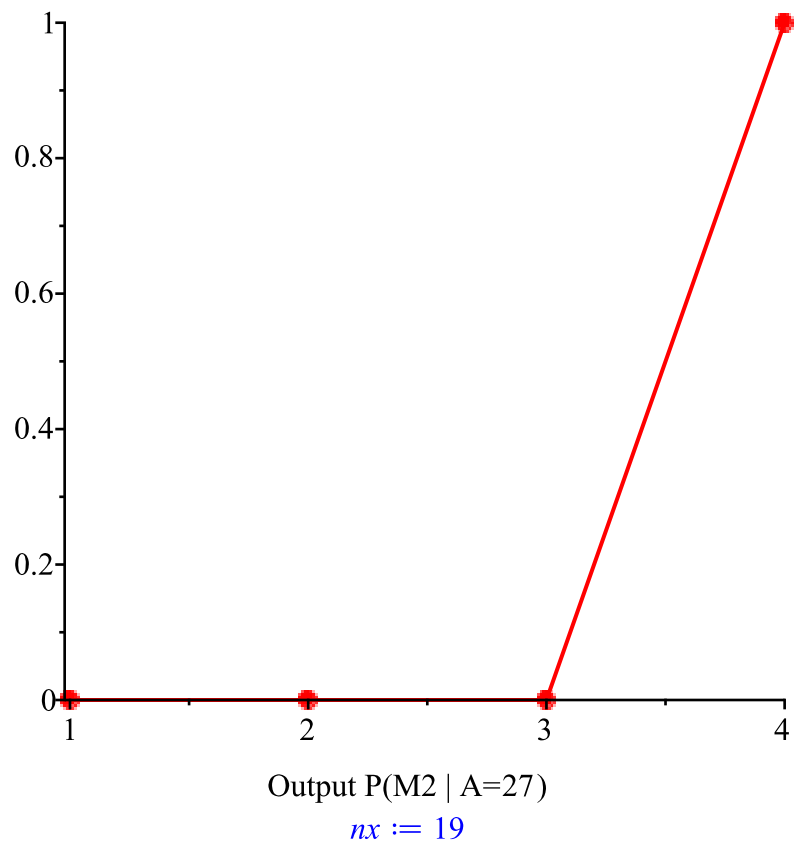

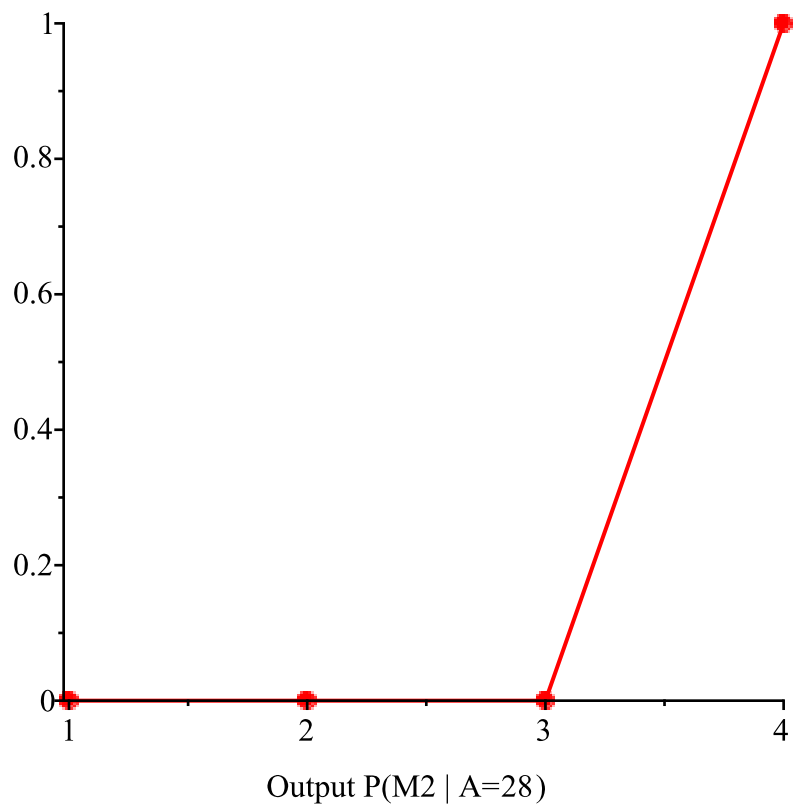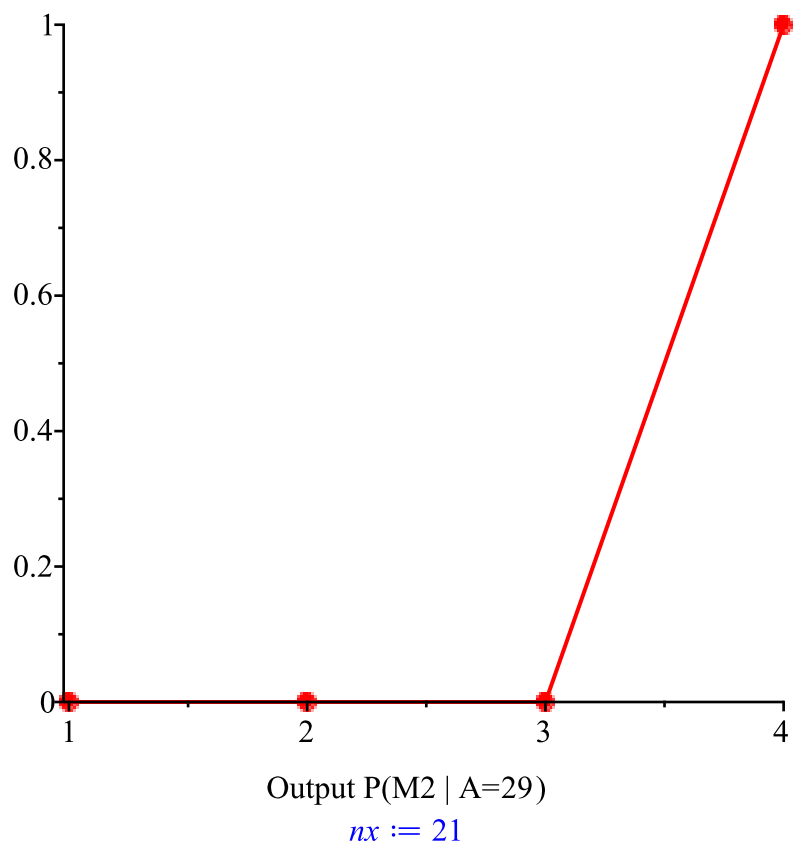

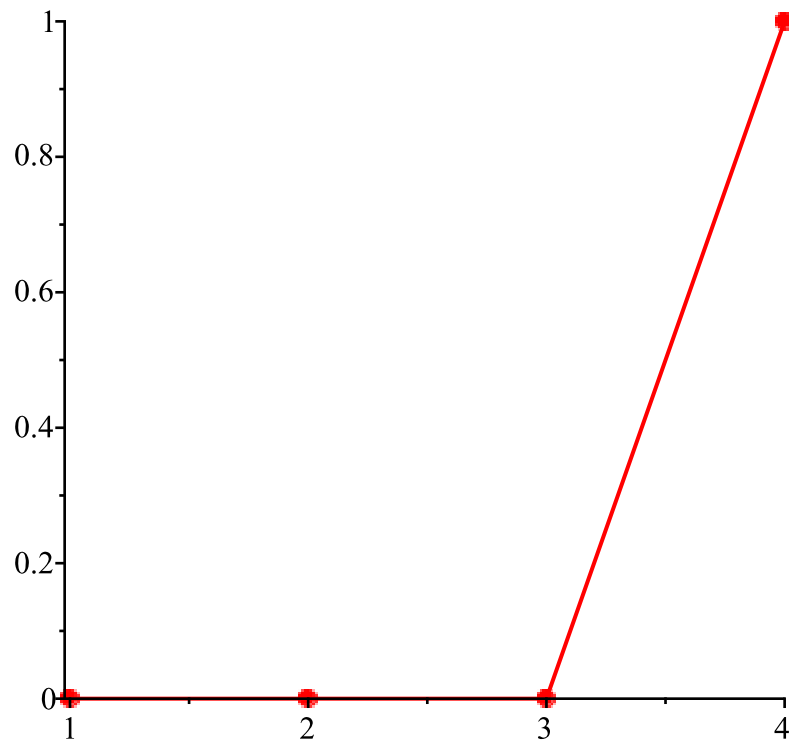

Output P(M2 | A=30)

*nx := 22*

(70)

*# Berechne  $P(A \geq 18 | M18 = m1, M2 = m2)$*

*PA18M18M2 := Matrix(NM18, NM2, 0.) :*

*for ny1 from 1 to NM18 do*

*for ny2 from 1 to NM2 do*

*for nx from AMin to NA do*

*PA18M18M2[ny1, ny2] := PA18M18M2[ny1, ny2] + PAM118M2[nx, NM2 · (ny1 - 1)*

*+ ny2] :*

*end do;*

*end do:*

*end do:*

*#PAM118M2;*

*PA18M18M2;*

|    |                    |                   |                    |
|----|--------------------|-------------------|--------------------|
| 0. | 0.0783479464506893 | 0.733837840754400 | 1.                 |
| 0. | 0.188899639017959  | 0.860471447746264 | 1.                 |
| 0. | 0.406917851958642  | 0.952150879980468 | 1.0000000000000000 |
| 0. | 0.578440776893369  | 0.983651809820881 | 1.                 |

(71)

*dataplot([1, 2, 3, 4], [1, 2, 3, 4], PA18M18M2);*

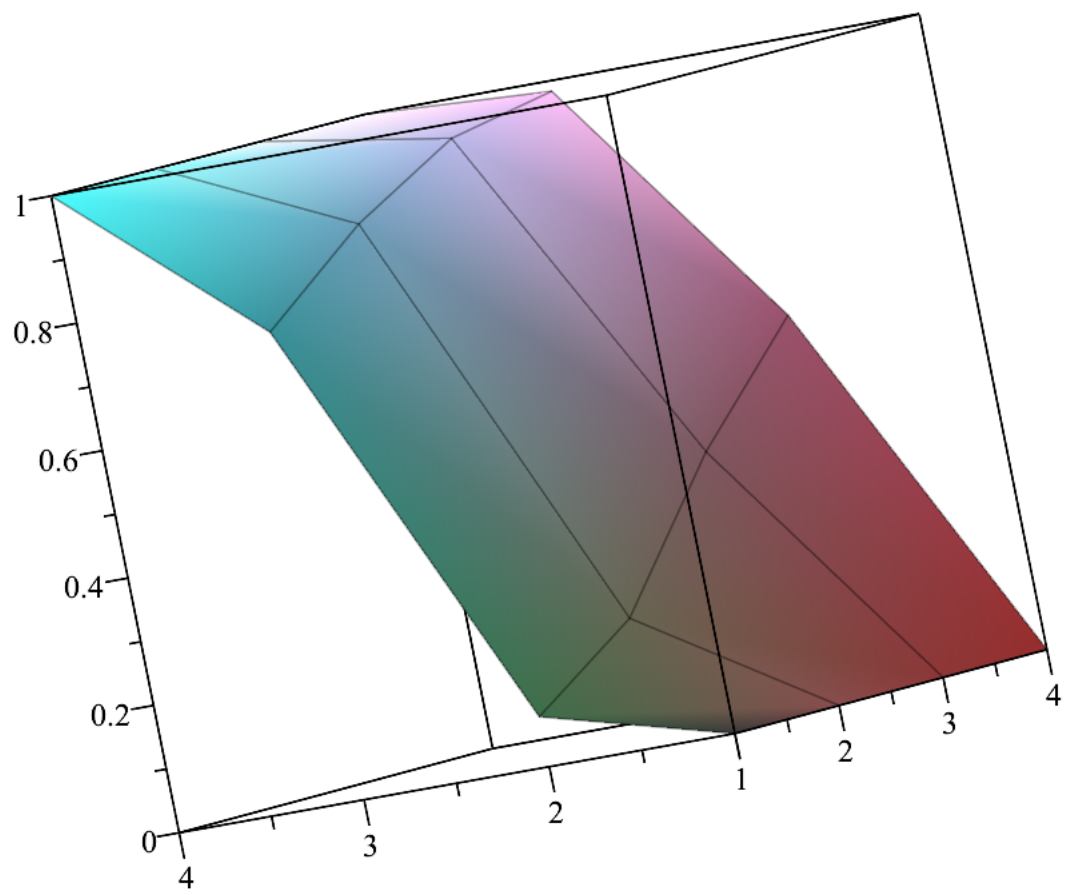

Supplement: MOESM1 [file 26588274]
